# Supplementary material for: Modulating the ground state, stability and charge transport in OFETs of biradicaloid hexahydro-diindenopyrene derivatives and a proposed method to estimate the biradical character
Source: Royal Society of Chemistry journal article supplement (doi:10.1039/d0sc04583g), 2020-01-01
Supplement: d0sc04583g1.pdf [file d0sc04583g1.pdf]

## Electronic Supplementary Information

### Modulating the ground state, stability and charge transport in OFETs of biradicaloid Hexahydro-diindenopyrene derivatives and a proposed method to estimate the biradical character

Tanguy Jousselin-Oba,<sup>a</sup> Masashi Mamada,<sup>\*b</sup> Atsushi Okazawa,<sup>c</sup> Jérôme Marrot,<sup>a</sup> Takayuki Ishida,<sup>d</sup> Chihaya Adachi,<sup>b,e</sup> Abderrahim Yassar,<sup>f</sup> Michel Frigoli<sup>\*a</sup>

---

<sup>a.</sup> UMR CNRS 8180, UVSQ, Institut Lavoisier de Versailles, Université Paris-Saclay, 45 avenue des Etats-Unis, 78035 Versailles Cedex, France. [michel.frigoli@uvsq.fr](mailto:michel.frigoli@uvsq.fr)

<sup>b.</sup> Center for Organic Photonics and Electronics Research (OPERA), JST ERATO Adachi Molecular Exciton Engineering Project, and Academia-Industry Molecular Systems for Devices Research and Education Center, Kyushu University, Kyushu University, Nishi, Fukuoka, 819-0395 Japan. [mamada@opera.kyushu-u.ac.jp](mailto:mamada@opera.kyushu-u.ac.jp)

<sup>c.</sup> Division of Chemistry, Institute of Liberal Education, Nihon University School of Medicine, Itabashi, Tokyo 173-8610, Japan.

<sup>d.</sup> Department of Engineering Science, The University of Electro-Communications, Chofu, Tokyo 182-8585, Japan.

<sup>e.</sup> International Institute for Carbon Neutral Energy Research (WPI-I2CNER), Kyushu University, Nishi, Fukuoka 819-0395, Japan.

<sup>f.</sup> Ecole Polytechnique, Institut Polytechnique de Paris, LPICM, CNRS, route de Saclay, 91128 Palaiseau, France.

## Content

|                                                                                                                            |     |
|----------------------------------------------------------------------------------------------------------------------------|-----|
| GENERAL METHODS FOR SYNTHESIS .....                                                                                        | S3  |
| INSTRUMENTS .....                                                                                                          | S3  |
| SYNTHESIS .....                                                                                                            | S4  |
| X-RAY STRUCTURE OF alcohol by product (CCDC: 1987611) .....                                                                | S14 |
| X-RAY STRUCTURE OF HDIP (CCDC: 1987607).....                                                                               | S15 |
| X-RAY STRUCTURE OF <i>LINEAR</i> -HDIP (CCDC: 1987608).....                                                                | S16 |
| X-RAY STRUCTURE OF <i>Syn</i> -HDIP (CCDC: 1987609).....                                                                   | S17 |
| X-RAY STRUCTURE OF <i>Anti</i> -HDIP (CCDC: 1987610).....                                                                  | S18 |
| VARIABLE TEMPERATURE <sup>1</sup> H NMR of HDIP in <i>o</i> -DCB (d <sub>4</sub> ) .....                                   | S19 |
| VARIABLE TEMPERATURE <sup>1</sup> H NMR of <i>linear</i> -HDIP in <i>o</i> -DCB (d <sub>4</sub> ) with COSY and NOESY..... | S20 |
| VARIABLE TEMPERATURE <sup>1</sup> H NMR of <i>syn</i> -HDIP in <i>o</i> -DCB (d <sub>4</sub> ).....                        | S22 |
| VARIABLE TEMPERATURE <sup>1</sup> H NMR of <i>anti</i> -HDIP in <i>o</i> -DCB (d <sub>4</sub> ) with COSY and NOESY .....  | S23 |
| ESR and SQUID MEASUREMENTS.....                                                                                            | S25 |
| STABILITY TESTS OF HDIP DERIVATIVES .....                                                                                  | S27 |
| THERMOGRAVIMETRY ANALYSIS OF HDIP derivatives under N <sub>2</sub> .....                                                   | S29 |
| THEORITICAL CALCULATIONS .....                                                                                             | S30 |
| HDIP: Bond length comparison of X-ray structure and calculations .....                                                     | S32 |
| <i>Linear</i> -HDIP: Bond length comparison of X-ray structure and calculations.....                                       | S34 |
| <i>Syn</i> -HDIP: Bond length comparison of X-ray structure and calculations .....                                         | S36 |
| <i>Anti</i> -HDIP: Bond length comparison of X-ray structure and calculations .....                                        | S38 |
| TIPS-octazethrene: Bond length comparison of X-ray structure and calculations.....                                         | S40 |
| TIPS-heptazethrene: Bond length comparison of X-ray structure and calculations .....                                       | S42 |
| <i>Linear</i> -DIAn: Bond length comparison of X-ray structure and calculations .....                                      | S44 |
| ODD-ELECTRON DENSITY MAPS FOR FF DERIVATIVES.....                                                                          | S53 |
| OFET DEVICES .....                                                                                                         | S54 |
| RMN SPECTRA .....                                                                                                          | S56 |
| INFRARED SPECTRA .....                                                                                                     | S63 |
| MALDI (TOF) of HDIP derivatives.....                                                                                       | S67 |
| REFERENCES .....                                                                                                           | S71 |

## GENERAL METHODS FOR SYNTHESIS

---

All reactions were carried out under argon. Dichloromethane was distilled from P<sub>2</sub>O<sub>5</sub>, THF and Toluene were distilled over Na/benzophenone. Dichloromethane and Toluene were kept over activated 3 Å molecular sieves. All commercial reagents were used without further purification. 4,9-dibromo-1,2,3,6,7,8-hexahydropyrene, <sup>i</sup> methyl 2-(4,4,5,5-tetramethyl-1,3,2-dioxaborolan-2-yl)benzoate, <sup>ii</sup> methyl 1-(4,4,5,5-tetramethyl-1,3,2-dioxaborolan-2-yl)-2-naphthoate, <sup>iii</sup> 3-(4,4,5,5-tetramethyl-1,3,2-dioxaborolan-2-yl)-2-naphthoate, <sup>iv</sup> and methyl 3-(4,4,5,5-tetramethyl-1,3,2-dioxaborolan-2-yl)-2-naphthoate,<sup>v</sup> were obtained according to procedures described from literature. <sup>1</sup>H and <sup>13</sup>C NMR spectra were recorded at room temperature on Bruker Avance-300 MHz NMR spectrometer. <sup>1</sup>H NMR spectra were recorded at 300 MHz and <sup>13</sup>C NMR spectra were recorded at 75 MHz. Chloroform residual peak was taken as internal reference at 7.26 ppm for <sup>1</sup>H NMR and 77 ppm for <sup>13</sup>C NMR. *o*-Dichlorobenzene-d<sub>4</sub> residual peak was taken as internal reference at 7.20 ppm for <sup>1</sup>H NMR. Infrared spectra were recorded from Nicolet 6700 FT-IR spectrometer. High-resolution mass spectra were obtained by using Waters Xevo Q-ToF using positive mode. MALDI High-resolution mass spectra and Elementary analysis were performed by the analysis platform of ICSN (Centre de Recherche de Gif - [www.icsn.cnrs-gif.fr](http://www.icsn.cnrs-gif.fr)).

## INSTRUMENTS

---

Thermogravimetry-differential thermal analysis (TG-DTA) and differential scanning calorimetry (DSC) were performed on a TA Instruments SDT Q600 unit under a N<sub>2</sub> atmosphere with a heating rate of 10 °C per minute. Cyclic voltammetry was performed with BAS Electrochemical system in a three-electrode single-compartment cell with platinum working electrode, a platinum wire counter electrode, and an Ag/AgNO<sub>3</sub> reference electrode. The measurements were carried out in dry chlorobenzene using a 0.1 M tetrabutylammonium hexafluorophosphate (TBAPF<sub>6</sub>) electrolyte, the solution being purged with nitrogen prior to measurement. All potentials were internally referred to the ferrocene/ferrocenium couple. Ultraviolet-visible (UV-vis) absorption spectra were recorded on UV-vis (Lambda 950-PKA, PerkinElmer) spectrophotometer. The thickness of CYTOP was measured by surface profiler Bruker Dektak XT. The channel width and length were measured optically with a laser scanning microscope (Olympus LEXT).

## SYNTHESIS

---

### Compound 1a

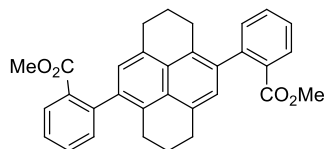

A solution of 4,9-dibromo-1,2,3,6,7,8-hexahydropyrene (1 g, 2.73 mmol), methyl 2-(4,4,5,5-tetramethyl-1,3,2-dioxaborolan-2-yl)benzoate (2.12 g; 8.1 mmol),  $K_3PO_4$  (3.44 g; 16.2 mmol) and toluene/water (36/4 mL) was degassed for 30 min with argon. Tris(dibenzylideneacetone)dipalladium (0) ( $Pd_2(dba)_3$ ) (124 mg; 0.135 mmol) and S-Phos (111 mg; 0.270 mmol) were then added. The resulting solution was heated at 100°C for 36 hours. The crude mixture was left to return to room temperature, diluted with chloroform. The solution was heated and then filtered through a pad of silica gel with hot chloroform several times. The resulting solution was concentrated under vacuum. The crude product was precipitated in DCM/MeOH. The solid obtained was then pass through a pad of silica gel eluted first with Petroleum ether / DCM (50/50) then with DCM to obtain a mixture of atropisomers (white solid, 1.20 g, 92%). Only  $^1H$  NMR could be performed due to low solubility.  $^1H$  NMR (300 MHz,  $CDCl_3$ )  $\delta$  7.97 (d,  $J = 7.8$  Hz, 2H), 7.59 – 7.52 (m, 2H), 7.44 (td,  $J = 7.6, 1.2$  Hz, 2H), 7.34 – 7.27 (m, 2H), 7.02 (d,  $J = 7.8$  Hz, 2H), 3.64 (s, 2.7H), 3.62 (s, 3.3H), 3.10 – 3.00 (m, 4H), 2.75 – 2.70 (m, 4H), 2.00-1.90 (m, 4H). IR ( $cm^{-1}$ ) = 1719 (COOMe); Elementary analysis: calculated for %C: 80.65; %H: 5.92; found for %C: 80.38; %H: 5.94.

### Compound 1b

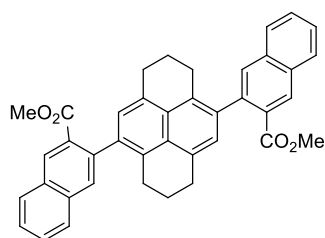

The synthesis of **1b** follows the same recipe as described for **1a** with 4,9-dibromo-1,2,3,6,7,8-hexahydropyrene (1 g, 2.70 mmol), methyl 1-(4,4,5,5-tetramethyl-1,3,2-dioxaborolan-2-yl)-2-naphthoate (2.53 g; 8.10 mmol),  $K_3PO_4$  (5.16 g; 24.3 mmol), toluene/water (54/6 mL),  $Pd_2(dba)_3$  (186 mg; 0.203 mmol) and S-Phos (167 mg; 0.407 mmol). Only  $^1H$  NMR could be performed due to low solubility. Yield 90% (2.13 g);  $^1H$  NMR (300 MHz,  $CDCl_3$ )  $\delta$  8.55 (s, 2H), 8.00 (d,  $J = 7.7$  Hz, 2H), 7.86 (t,  $J = 7.0$  Hz, 2H), 7.77 (s, 1.1H), 7.73 (s, 0.9H), 7.65 – 7.54 (m, 4H), 7.14 (d,  $J = 7.5$  Hz, 2H), 3.71 (s, 2.7H), 3.69 (s, 3.3H), 3.10-3.09 (m, 4H), 2.81-2.77 (m, 4H), 2.02 – 1.90 (m, 4H); IR ( $cm^{-1}$ ) = 1718 (COOMe); Elementary analysis: calculated for %C: 83.31; %H: 5.59; found for %C: 82.96; %H: 5.63.

## Compound 1c

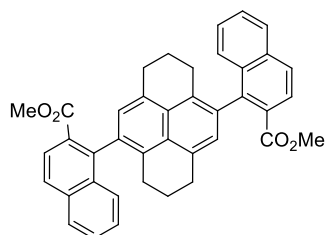

The synthesis of **1c** follows the same recipe as described for **1a** with 4,9-dibromo-1,2,3,6,7,8-hexahydropyrene (1 g, 4.10 mmol), methyl 3-(4,4,5,5-tetramethyl-1,3,2-dioxaborolan-2-yl)-2-naphthoate (2.53 g; 8.10 mmol),  $K_3PO_4$  (3.44 g; 16.2 mmol), toluene/water (36/4 mL),  $Pd_2(dba)_3$  (124 mg; 0.135 mmol) and S-Phos (111 mg; 0.270 mmol). The crude product was purified by column chromatography using as eluent first EP/DCM (50/50) to collect first diastereoisomers (*trans*-configuration, 745 mg) then with dichloromethane to collect the second diastereoisomers (*cis*-configuration, 519 mg). The global yield is of 90 % with a ratio *trans/cis* of 59/41.

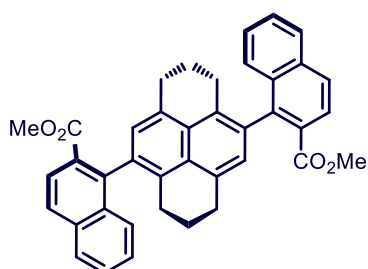

First diastereoisomer (*trans*): *Rf*: 0.54 (30/70, PE/DCM),  $^1H$  NMR (300 MHz,  $CDCl_3$ )  $\delta$  8.03 (d,  $J = 8.6$  Hz, 2H), 7.94 (d,  $J = 8.5$  Hz, 4H), 7.62 – 7.51 (m, 4H), 7.48 – 7.41 (m, 2H), 7.02 (s, 2H), 3.73 (s, 6H), 3.06-3.02 (m, 4H), 2.74-2.65 (m, 2H), 2.53-2.44 (m, 2H), 1.98 – 1.85 (m, 4H);  $^{13}C$  NMR (75 MHz,  $CDCl_3$ )  $\delta$  168.06, 142.49, 134.85, 133.65, 132.64, 132.60, 131.82, 129.72, 128.24, 127.86, 127.60, 127.49, 127.41, 126.68, 125.70, 125.53, 52.10, 31.35, 28.86, 23.10;  $^{13}C$  NMR (75 MHz,  $CDCl_3$ )  $\delta$  168.06, 142.49, 134.85, 133.65, 132.64, 132.60, 131.82, 129.72, 128.24, 127.86, 127.60, 127.49, 127.41, 126.68, 125.70, 125.53, 52.10, 31.35, 28.86, 23.10; IR ( $cm^{-1}$ ) = 1723 (COOMe); Elementary analysis: calculated for %C: 83.31; %H: 5.59; found for %C: 83.15; %H: 5.61.

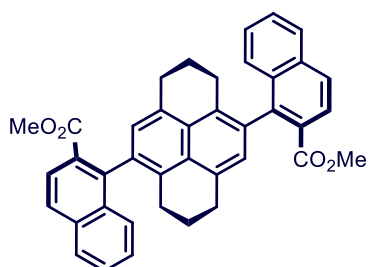

Second diastereoisomer (*cis*): *Rf*: 0.30 (30/70, PE/DCM),  $^1H$  NMR (300 MHz,  $CDCl_3$ )  $\delta$  7.94 (dd,  $J_{AB} = 16.0$ , 8.5 Hz, 6H), 7.58 – 7.48 (m, 4H), 7.43 – 7.35 (m, 2H), 7.02 (s, 2H), 3.56 (s, 6H), 3.05 - 3.99 (m, 2H), 2.74

– 2.62 (m, 2H), 2.52 – 2.45 (m, 2H), 2.0 – 1.85 (m, 4H); Elementary analysis: calculated for %C: 83.31; %H: 5.59; found for %C: 83.17; %H: 5.61.

### Compound 1d

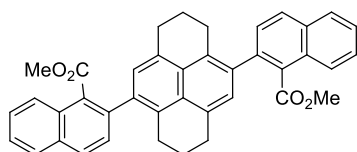

The synthesis of **1d** follows the same recipe as described for **1a** with 4,9-dibromo-1,2,3,6,7,8-hexahydropyrene (1 g, 4.10 mmol), methyl 3-(4,4,5,5-tetramethyl-1,3,2-dioxaborolan-2-yl)-2-naphthoate (2.53 g; 8.10 mmol), K<sub>3</sub>PO<sub>4</sub> (3.44 g; 16.2 mmol), toluene/water (36/4 mL), Pd<sub>2</sub>(dba)<sub>3</sub> (124 mg; 0.135 mmol) and S-Phos (111 mg; 0.270 mmol). Only <sup>1</sup>H NMR could be performed due to low solubility. Yield 85% (1.11 g); <sup>1</sup>H NMR (300 MHz, CDCl<sub>3</sub>) δ 7.99 (td, *J* = 8.1, 2.1 Hz, 6H), 7.67 – 7.57 (m, 4H), 7.50 (d, *J* = 8.4 Hz, 1.1H), 7.45 (d, *J* = 8.4 Hz, 0.9H), 7.20 (s, 2H), 3.66 (s, 3H), 3.65 (s, 3H), 3.12–3.08 (m, 4H), 2.90–2.87 (m, 4H), 2.11 – 1.90 (m, 4H); IR (cm<sup>-1</sup>) = 1727 (COOMe); Elementary analysis: calculated for %C: 83.31; %H: 5.59; found for %C: 83.14; %H: 5.61.

### Compound 2a

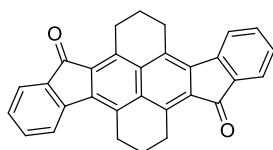

Compound **1a** (900 mg, 1.89 mmol) was put in suspension in 1,2-Dichloroethane (72 mL). TfOH (5.83 mL, 66 mmol) was then added dropwise. The resulting mixture was stirred at room temperature overnight then was transferred to an Erlenmeyer flask with a minimum amount of dichloromethane. MeOH (150 mL) was carefully added followed by a saturated aq. NaHCO<sub>3</sub> solution until neutral pH then diluted with plenty of water. The resulting precipitate was filtered, washed with water and MeOH. After drying under vacuum, compound **2a** was obtained as orange solid (677 mg, 78%). Due to the insolubility of the compound, only IR was measured. IR (cm<sup>-1</sup>) = 1692 (C=O stretching of 5-membered ring); Elementary analysis: calculated for %C: 87.36; %H: 4.89; found for %C: 86.99; %H: 4.93.

### Compound 2b

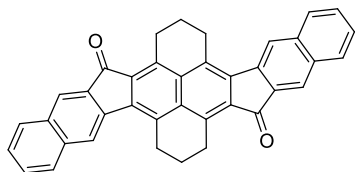

Compound **1b** (1.5 g, 2.60 mmol) was put in suspension in 1,2-Dichloroethane (100 mL). TfOH (8 mL, 91 mmol) was then added dropwise. The resulting mixture was stirred at room temperature for 5h then was transferred to an Erlenmeyer flask with a minimum amount of dichloromethane. MeOH (200 mL) was carefully added followed by a saturated aq. NaHCO<sub>3</sub> solution until neutral pH then diluted with plenty of water. The resulting precipitate was filtered, washed with water and MeOH. After drying under vacuum, compound **2b** was obtained as orange solid (1.29 g, 98%). Due the insolubility of the compound, only IR was measured. IR (cm<sup>-1</sup>) = 1691 (C=O stretching of 5-membered ring); Elementary analysis: calculated for %C: 89.04; %H: 4.72; found for %C: 88.65; %H: 4.75.

### Compound 2c

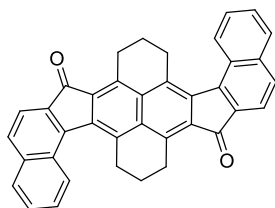

Compound **2c** (408 mg, 0.708 mmol) was put in suspension in 1,2-Dichloroethane (27 mL). TfOH (4.38 mL, 49.6 mmol) was then added dropwise. The resulting mixture was stirred at room temperature overnight then was transferred to an Erlenmeyer flask with a minimum amount of dichloromethane. MeOH (60 mL) was carefully added followed by a saturated aq. NaHCO<sub>3</sub> solution until neutral pH then diluted with plenty of water. The resulting precipitate was filtered, washed with water and MeOH. After drying under vacuum, compound **2c** was obtained as orange-red solid (323 mg, 89%). Due the insolubility of the compound, only IR was measured. IR (cm<sup>-1</sup>) = 1688 (C=O stretching of 5-membered ring); Elementary analysis: calculated for %C: 89.04; %H: 4.72; found for %C: 88.25; %H: 4.77.

## Compound 2d

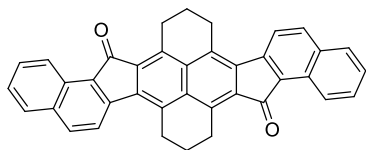

Compound **1d** (850 mg, 1.47 mmol) was put in suspension in 1,2-Dichloroéthane (56 mL). TfOH (8 mL, 91 mmol) was then added dropwise. The resulting mixture was stirred at room temperature for 5h than was transferred to an Erlenmeyer flask with a minimum amount of dichloromethane. MeOH (110 mL) was carefully added followed by a saturated aq. NaHCO<sub>3</sub> solution until neutral pH then diluted with plenty of water. The resulting precipitate was filtered, washed with water and MeOH. After drying under vacuum, compound **2d** was obtained as orange-red solid (766 mg, 75%). Due the insolubility of the compound, only IR was measured. IR (cm<sup>-1</sup>) = 1676 (C=O stretching of 5-membered ring); Elementary analysis: calculated for %C: 89.04; %H: 4.72; found for %C: 88.60; %H: 4.75.



## HDIP

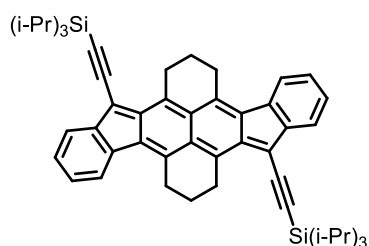

(Triisopropylsilyl)acetylene (0.46 g, 2.45 mmol) in THF (6 mL) was cooled to 0 °C. *n*-BuLi (1.51 mL, 2.41 mmol, 1.6 M) was added and the mixture stirred at 0 °C for 30 min. In a separate flask, **compound 2a** (206 mg, 0.049 mmol) in THF (60 mL) was sonicated for 30 min and then cooled to 0 °C. The lithiate solution was cannulated into the cold diene suspension and the reaction was stirred for 3h30 at room temperature. The reaction was quenched by addition of saturated aq. NH<sub>4</sub>Cl solution and extracted with Et<sub>2</sub>O. The organic layer was washed with water and dried (MgSO<sub>4</sub>), filtered, and concentrated under vacuum keeping the temperature below 40°C. The crude product was precipitated purified by filtration on an alumina gel pad, eluting with different mixture of solvent: petroleum ether/Dichloromethane/diethyl ether/methanol: starting with 10/0/0/0 to remove the excess of TIPS-acetylene, then 0/8/2/0 to collect the first diol diastereoisomer, and then 0/9/0/1 to collect the second diol diastereoisomer. The obtain diols after concentration under vacuum at temperature below 40°C were then precipitated in a mixture of dichloromethane/petroleum ether, filtered and dried under vacuum to afford the crude diols: 98 mg of the trans diol and 232 mg of the cis diol.

The diol (330 mg, 0.424 mmol) was dissolved in anhydrous toluene (126 ml), degassed for 30 min with Ar under sonication, then SnCl<sub>2</sub> (322 mg, 1.69 mmol) was added. The resulting mixture was stirred at room temperature for 1h20 then filtered over a pad of silica gel eluted with dichloromethane. After concentration the product was precipitated with CH<sub>2</sub>Cl<sub>2</sub> and MeCN and filtered. The filtrate is purified by column chromatography eluted with petroleum ether/dichloromethane: 9/1 to afford a bit of HDIP and the partially aromatized monoalcohol (39 mg, 12%). The fraction of the HDIP obtain by chromatography is putted together with the previously obtained precipitate, and is precipitated in a mixture of dichloromethane/petroleum ether to afford the expected HDIP (163 mg, 48%) as a blue solid. Due to the low solubility of HDIP, only the <sup>1</sup>H NMR was recorded. <sup>1</sup>H NMR (300 MHz, CDCl<sub>3</sub>) δ 7.70 (dd, *J* = 6.2, 2.0 Hz, 2H), 7.53 – 7.45 (m, 2H), 7.23 – 7.14 (m, 4H), 3.58 (t, *J* = 6.1 Hz, 4H), 3.27 (t, *J* = 6.2 Hz, 4H), 2.16 – 1.92 (m, 4H), 1.35 – 1.12 (m, 42H); HRMS (MALDI-TOF): calculated for C<sub>52</sub>H<sub>62</sub>Si<sub>2</sub> (M<sup>+</sup>): 742.43901; found: 742.43850.

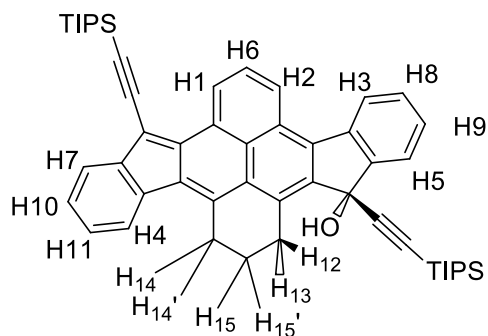

$^1\text{H}$  NMR (300 MHz,  $\text{CD}_2\text{Cl}_2$ )  $\delta$  9.64 (d,  $J = 7.5$  Hz, H1), 8.67 (d,  $J = 8.3$  Hz, H2), 8.22 (d,  $J = 7.6$  Hz, H3), 7.94 (d,  $J = 7.6$  Hz, H4), 7.77 (d,  $J = 7.2$  Hz, H5), 7.70 (t,  $J = 8.0$  Hz, H6), 7.65 (d,  $J = 7.2$  Hz, H7), 7.49 (t,  $J = 6.9$  Hz, H8), 7.43 (t,  $J = 7.1$  Hz, H9), 7.37 (t,  $J = 7.1$  Hz, H10), 7.28 (t,  $J = 7.0$  Hz, H11), 3.95 – 3.80 (m, H12), 3.68 – 3.53 (m, H13), 3.52 – 3.35 (m, H14, H14'), 2.59 (s, OH), 2.31 – 2.04 (m, H15, H15'), 1.33 – 1.21 (m, 21H, TIPS), 1.01 (s, 21H, TIPS).

### Linear-HDIP

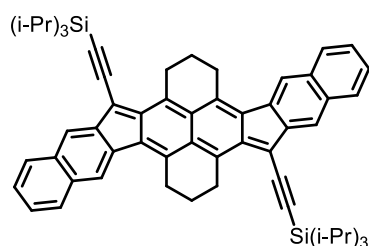

(Triisopropylsilyl)acetylene (0.854 g, 4.68 mmol) in THF (12 mL) was cooled to 0 °C. *n*-BuLi (2.8 mL, 4.53 mmol, 1.6 M) was added and the mixture stirred at 0 °C for 30 min. In a separate flask, **compound 2b** (390 mg, 0.76 mmol) in THF (120 mL) was sonicated for 30 min and then cooled to 0 °C. The lithiated solution was cannulated into the cold dione suspension and the reaction was stirred for 4h at room temperature. The reaction was quenched by addition of saturated aq.  $\text{NH}_4\text{Cl}$  solution and extracted with  $\text{Et}_2\text{O}$ . The organic layer was washed with water and dried ( $\text{MgSO}_4$ ), filtered, and concentrated under vacuum keeping the temperature below 40°C. The crude product was precipitated purified by filtration on an alumina gel pad, eluting with different mixture of solvent: petroleum ether/dichloromethane/diethyl ether/methanol: starting with 10/0/0/0 to remove the excess of TIPS-acetylene, then 0/8/2/0 to collect the first *trans*-diastereoisomer, and then 0/9/0/1 to collect the *cis*-diol diastereoisomer. The obtain diols after concentration under vacuum at temperature below 40°C were then precipitated in a mixture of dichloromethane/petroleum ether, filtered and dried under vacuum to afford the crude diols 175 mg of the *trans*-diol and 474 mg of the *cis*-diol.

The *trans*-diol (175 mg, 0.200 mmol) was dissolved in anhydrous toluene (70 ml), degassed for 30 min with Ar under sonication, then  $\text{SnCl}_2$  (151 mg, 0.798 mmol) was added. The resulting mixture was stirred at room temperature for 2h30, and then filtered over a pad of silica gel eluted with dichloromethane. After concentration the product was precipitated with  $\text{CH}_2\text{Cl}_2$  and MeCN and

filtered. The precipitate is solubilized in dichloromethane and precipitated with petroleum ether upon evaporation of the dichloromethane under vacuum and then filtrated. The MeCN and petroleum ether filtrate are put together and purified by column chromatography eluted with petroleum ether/dichloromethane: 9/1 to afford a bit of linear-HDIP. The fraction of the *linear*-HDIP obtain by chromatography is putted together with the previously obtained precipitate, and is precipitated again twice in a mixture of dichloromethane/petroleum ether to afford the expected *linear*-HDIP (73mg, 41%) as a dark blue solid.

Starting with the *cis*-diol (474 mg, 0,540 mmol) under the same condition, the reaction time is 1h20 until completion and afford the about the same yield (191mg, 40%).

Due to the low solubility of *linear*-HDIP, only the  $^1\text{H}$  NMR was recorded.  $^1\text{H}$  NMR (300 MHz,  $\text{CDCl}_3$ )  $\delta$  8.08 (s, 2H), 7.85 (s, 2H), 7.83 – 7.69 (m, 4H), 7.40-7.34 (m, 4H), 3.67 (t,  $J = 5.8$  Hz, 4H), 3.40 (t,  $J = 6.1$  Hz, 4H), 2.12 (dt,  $J = 12.2, 6.1$  Hz, 4H), 1.29 (dd,  $J = 16.8, 3.9$  Hz, 42H); HRMS (MALDI-TOF): calculated for  $\text{C}_{60}\text{H}_{66}\text{Si}_2$  ( $\text{M}^+$ ): 842.47031; found: 842.47138.

### Syn-HDIP

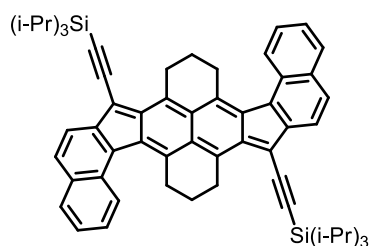

(Triisopropylsilyl)acetylene (0.854 g, 4.68 mmol) in THF (12 mL) was cooled to 0 °C. *n*-BuLi (2.8 mL, 4.53 mmol, 1.6 M) was added and the mixture stirred at 0 °C for 30 min. In a separate flask, **compound 2b** (400 mg, 0,78 mmol) in THF (120 mL) was sonicated for 30 min and then cooled to 0 °C. The lithiated solution was cannulated into the cold dione suspension and the reaction was stirred for 4h at room temperature. The reaction was quenched by addition of saturated aq.  $\text{NH}_4\text{Cl}$  solution and extracted with  $\text{Et}_2\text{O}$ . The organic layer was washed with water and dried ( $\text{MgSO}_4$ ), filtered, and concentrated under vacuum keeping the temperature below 40°C. The crude product was precipitated purified by filtration on an alumina gel pad, eluting with different mixture of solvent: petroleum ether/dichloromethane/diethyl ether: starting with 10/0/0 to remove the excess of TIPS-acetylene, then 5/5/0 to collect the *trans*-diol diastereoisomer and then 0/5/5 to collect the *cis*-diol diastereoisomer. The obtain diols after concentration under vacuum at temperature below 40°C were then precipitated twice in a mixture of dichloromethane/petroleum ether, filtered and dried under vacuum to afford the crude diols 268 mg of the *trans*-diol and 173 mg of the *cis*-diol.

The *cis*-diol (170 mg, 0.194 mmol) was dissolved in anhydrous toluene (70 ml), degassed for 30 min with Ar under sonication, then  $\text{SnCl}_2$  (147 mg, 0.775 mmol) was added. The resulting mixture was stirred at room temperature for 1h30, and then filtered over a pad of silica gel eluted with dichloromethane. After concentration the product was precipitated with  $\text{CH}_2\text{Cl}_2$  and MeCN and

filtered and precipitated again in dichloromethane/methanol. The precipitate is purified by column chromatography eluted with petroleum ether/dichloromethane: 9/1 to afford a *syn*-HDIP. The fraction of the *syn*-HDIP obtain by chromatography is putted together with the previously obtained precipitate, and is precipitated again twice in a mixture of dichloromethane/petroleum ether to afford the expected *syn*-HDIP (31mg, 13%) as a dark blue solid.

Starting with the *trans*-diol (268 mg, 0.305 mmol) under the same condition, the reaction time is 1h50 until completion and afford about the same yield (61 mg, 8%).

Due to the low solubility of *syn*-HDIP, only the  $^1\text{H}$  NMR was recorded.  $^1\text{H}$  NMR (300 MHz,  $\text{CDCl}_3$ )  $\delta$  8.18 (d,  $J = 8.3$  Hz, 2H), 7.75 (d,  $J = 7.1$  Hz, 2H), 7.63 (s, 4H), 7.44 (t,  $J = 7.0$  Hz, 2H), 7.36 (t,  $J = 7.2$  Hz, 2H), 3.63 (t,  $J = 5.8$  Hz, 4H), 3.36 – 3.23 (m, 4H), 2.04 – 1.80 (m, 4H), 1.34 – 1.12 (m, 42H); HRMS (MALDI-TOF): calculated for  $\text{C}_{60}\text{H}_{66}\text{Si}_2$  ( $\text{M}^+$ ): 842.47031; found: 842.47254.

### Anti-HDIP

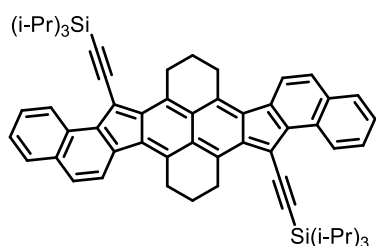

(Triisopropylsilyl)acetylene (1.07 g, 5.85 mmol) in THF (16 mL) was cooled to 0 °C. *n*-BuLi (3.53 mL, 5.64 mmol, 1.6 M) was added and the mixture stirred at 0 °C for 30 min. In a separate flask, **compound 2b** (500 mg, 0,98 mmol) in THF (150 mL) was sonicated for 30 min and then cooled to 0 °C. The lithiated solution was cannulated into the cold dione suspension and the reaction was stirred for 4h at room temperature. The reaction was quenched by addition of saturated aq.  $\text{NH}_4\text{Cl}$  solution and extracted with  $\text{Et}_2\text{O}$ . The organic layer was washed with water and dried ( $\text{MgSO}_4$ ), filtered, and concentrated under vacuum keeping the temperature below 40°C. The crude product was precipitated purified by filtration on an alumina gel pad, eluting with different mixture of solvent: petroleum ether/dichloromethane/diethyl ether/methanol: starting with 10/0/0/0 to remove the excess of TIPS-acetylene, then 0/8/2/0 to collect the *trans*-diol diastereoisomer, and then 0/8/0/2 to collect the *cis*-diol diastereoisomer. The obtain diols after concentration under vacuum at temperature below 40°C were then precipitated in a mixture of dichloromethane/petroleum ether, filtered and dried under vacuum to afford the crude diols: 244 mg of the *trans*-diol and 478 mg of the *cis*-diol.

The *trans*-diol (100 mg, 0.114 mmol) was dissolved in anhydrous toluene (40 ml), degassed for 30 min with Ar under sonication, then  $\text{SnCl}_2$  (87 mg, 0.456 mmol) was added. The resulting mixture was stirred at room temperature for 4h30, and then filtered over a pad of silica gel eluted with dichloromethane and then hot toluene. After concentration the product was precipitated twice with

CH<sub>2</sub>Cl<sub>2</sub> and MeCN, filtered, washed with MeCN, methanol, petroleum ether and acetone and dried under vacuum to afford *anti* HDIP (53 mg, 51%) as a dark blue solid.

Starting with the *trans*-diol (100 mg, 0.114 mmol) under the same condition, the reaction time is 2h30 until completion and afford about the same yield (52 mg, 52%).

Due to the low solubility of *Anti*-HDIP, only the <sup>1</sup>H NMR was recorded; <sup>1</sup>H NMR (300 MHz, CDCl<sub>3</sub>) δ 9.68 – 9.63 (m, 2H), 7.83 (d, *J* = 8.8 Hz, 2H), 7.72 (dd, *J* = 6.3, 3.3 Hz, 2H), 7.55 (d, *J* = 8.3 Hz, 2H), 7.41-7.36 (m, 3H), 3.69 (t, *J* = 5.9 Hz, 4H), 3.35 (t, *J* = 6.5 Hz, 4H), 2.15 – 1.94 (m, 4H), 1.60 – 0.96 (m, 42H); HRMS (MALDI-TOF): calculated for C<sub>60</sub>H<sub>66</sub>Si<sub>2</sub> (M<sup>+</sup>): 842.47031; found: 842.47270.

## X-RAY STRUCTURE OF alcohol by product (CCDC: 1987611)

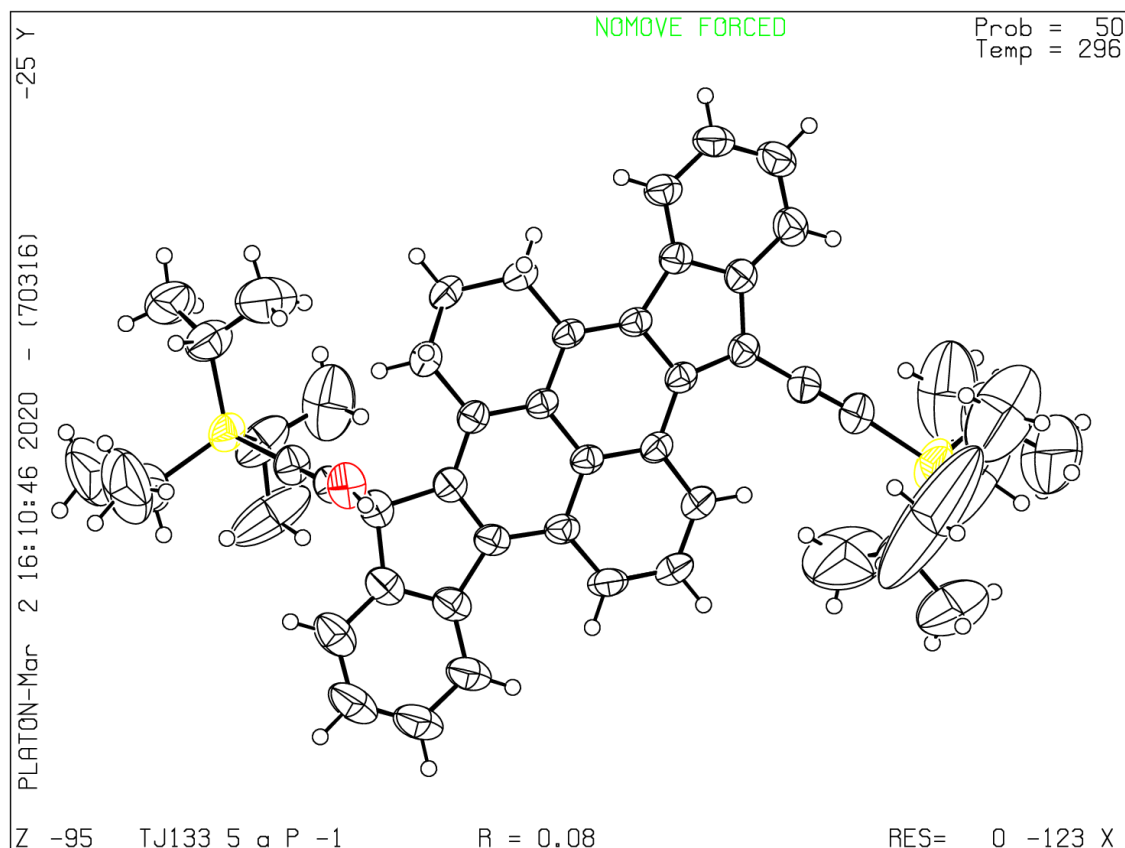

Crystal data for alcohol by product :  $C_{52}H_{60}OSi_2$ ,  $M_w = 757.18$ , triclinic, space group  $P-1$ ; dimensions:  $a = 11.6952(3) \text{ \AA}$ ,  $b = 12.3024(3) \text{ \AA}$ ,  $c = 18.2803(5) \text{ \AA}$ ,  $\alpha = 72.922(1)^\circ$ ,  $\beta = 72.859(1)^\circ$ ,  $\gamma = 66.635(1)^\circ$ ,  $V = 2259.89(10) \text{ \AA}^3$ ;  $Z = 2$ ;  $\mu = 0.11 \text{ mm}^{-1}$ ; 55136 reflections measured at 296 K; independent reflections: 10425 [ $7533 F_o > 4\sigma(F_o)$ ]; data were collected up to a  $2\theta_{max}$  value of  $55.2^\circ$  (99.6 % coverage). Number of variables: 509;  $R_1 = 0.080$ ,  $wR_2 = 0.232$ ,  $S = 1.05$ ; highest residual electron density  $0.64 \text{ e.\AA}^{-3}$ ; CCDC = 1987611.

## X-RAY STRUCTURE OF HDIP (CCDC: 1987607)

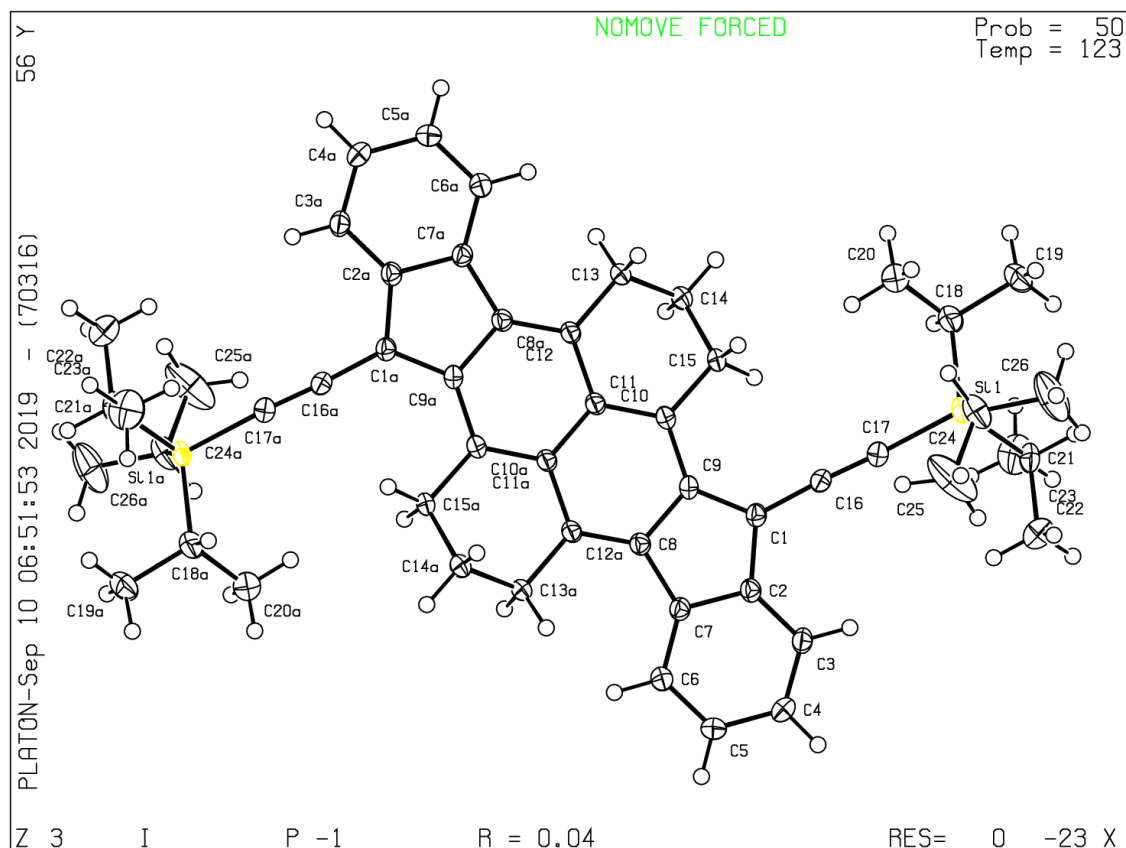

Crystal data for HDIP :  $C_{52}H_{62}Si_2$ ,  $M_w = 743.19$ , triclinic, space group  $P-1$ ; dimensions:  $a = 7.7000$  (5) Å,  $b = 8.2465$  (5) Å,  $c = 17.9156$  (8) Å,  $\alpha = 89.138$  (4)°,  $\beta = 79.878$  (4)°,  $\gamma = 75.346$  (5)°,  $V = 1082.95$  (11) Å<sup>3</sup>;  $Z = 1$ ;  $\mu = 0.12$  mm<sup>-1</sup>; 17540 reflections measured at 123 K; independent reflections: 4955 [3978  $F_o > 4\sigma(F_o)$ ]; data were collected up to a  $2\theta_{max}$  value of 54.8° (99.9 % coverage). Number of variables: 250;  $R_1 = 0.045$ ,  $wR_2 = 0.123$ ,  $S = 1.05$ ; highest residual electron density 0.51 e.Å<sup>-3</sup>; CCDC = 1987607.

## X-RAY STRUCTURE OF *LINEAR-HDIP* (CCDC: 1987608)

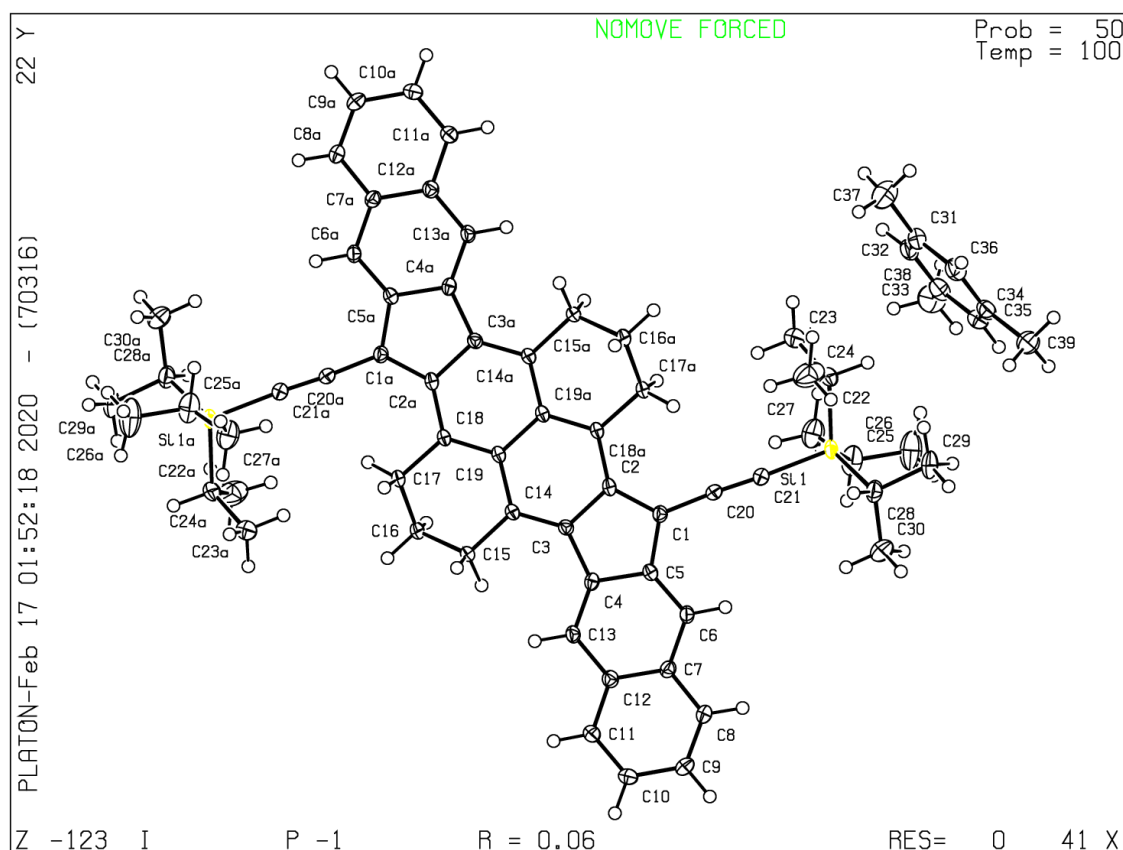

Crystal data for *linear-HDIP*:  $C_{78}H_{90}Si_2$ ,  $M_w = 1083.67$ , triclinic, space group  $P-1$ ; dimensions:  $a = 8.8789(6) \text{ \AA}$ ,  $b = 12.7356(5) \text{ \AA}$ ,  $c = 14.6701(9) \text{ \AA}$ ,  $\alpha = 99.626(4)^\circ$ ,  $\beta = 104.748(6)^\circ$ ,  $\gamma = 98.811(4)^\circ$ ,  $V = 1547.92(16) \text{ \AA}^3$ ;  $Z = 1$ ;  $\mu = 0.10 \text{ mm}^{-1}$ ; 17632 reflections measured at 100 K; independent reflections: 6212 [4914  $F_o > 4\sigma(F_o)$ ]; data were collected up to a  $2\theta_{\text{max}}$  value of  $52.6^\circ$  (98.3 % coverage). Number of variables: 370;  $R_1 = 0.059$ ,  $wR_2 = 0.144$ ,  $S = 1.03$ ; highest residual electron density  $0.86 \text{ e.\AA}^{-3}$ ; CCDC = 1987608.



## X-RAY STRUCTURE OF *Syn*-HDIP (CCDC: 1987609)

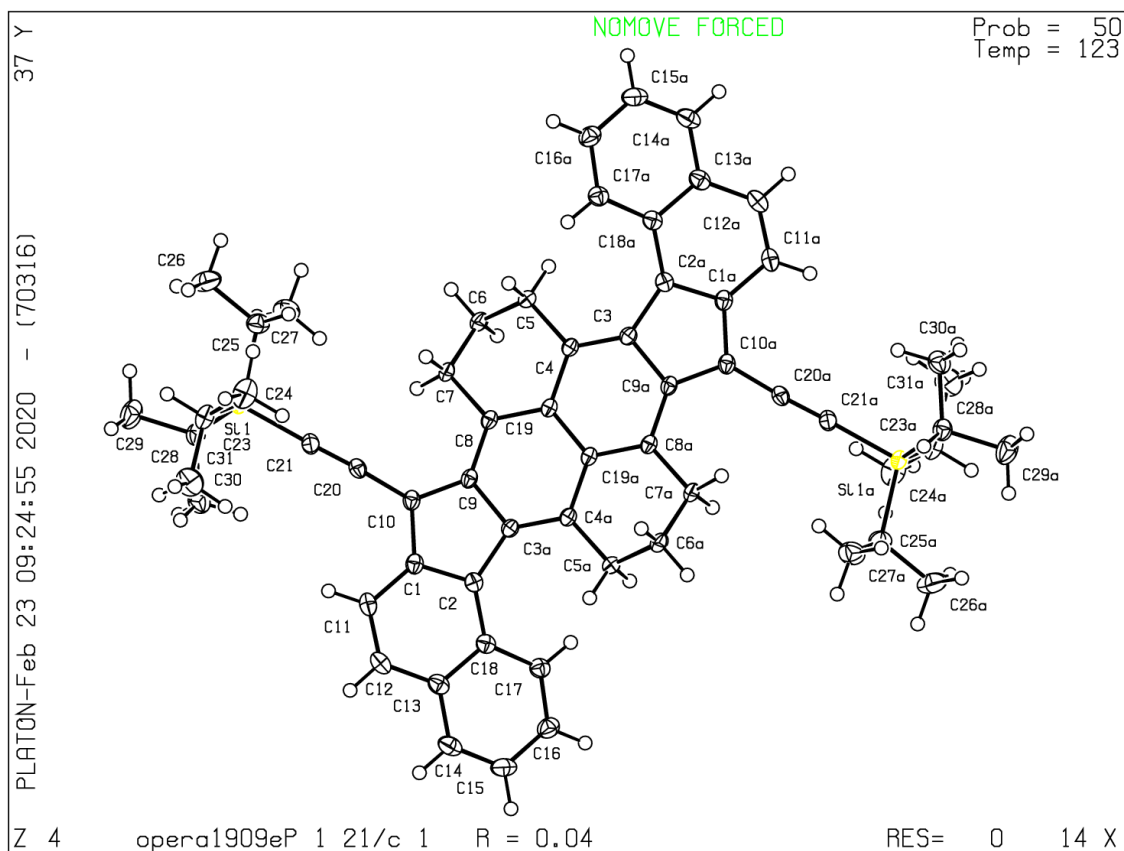

Crystal data for *syn*-HDIP :  $C_{60}H_{66}Si_2$ ,  $M_w = 843.30$ , monoclinic, space group  $P2_1/c$ ; dimensions:  $a = 8.1631(3) \text{ \AA}$ ,  $b = 13.8454(6) \text{ \AA}$ ,  $c = 21.1693(8) \text{ \AA}$ ,  $\beta = 91.995(4)^\circ$ ,  $V = 2391.13(18) \text{ \AA}^3$ ;  $Z = 2$ ;  $\mu = 0.11 \text{ mm}^{-1}$ ; 21124 reflections measured at 123 K; independent reflections: 5474 [ $4380 F_o > 4\sigma(F_o)$ ]; data were collected up to a  $2\theta_{\text{max}}$  value of  $54.9^\circ$  (99.8 % coverage). Number of variables: 286;  $R_1 = 0.042$ ,  $wR_2 = 0.103$ ,  $S = 1.03$ ; highest residual electron density  $0.37 \text{ e.\AA}^{-3}$ ; CCDC = 1987609.

## X-RAY STRUCTURE OF *Anti*-HDIP (CCDC: 1987610)

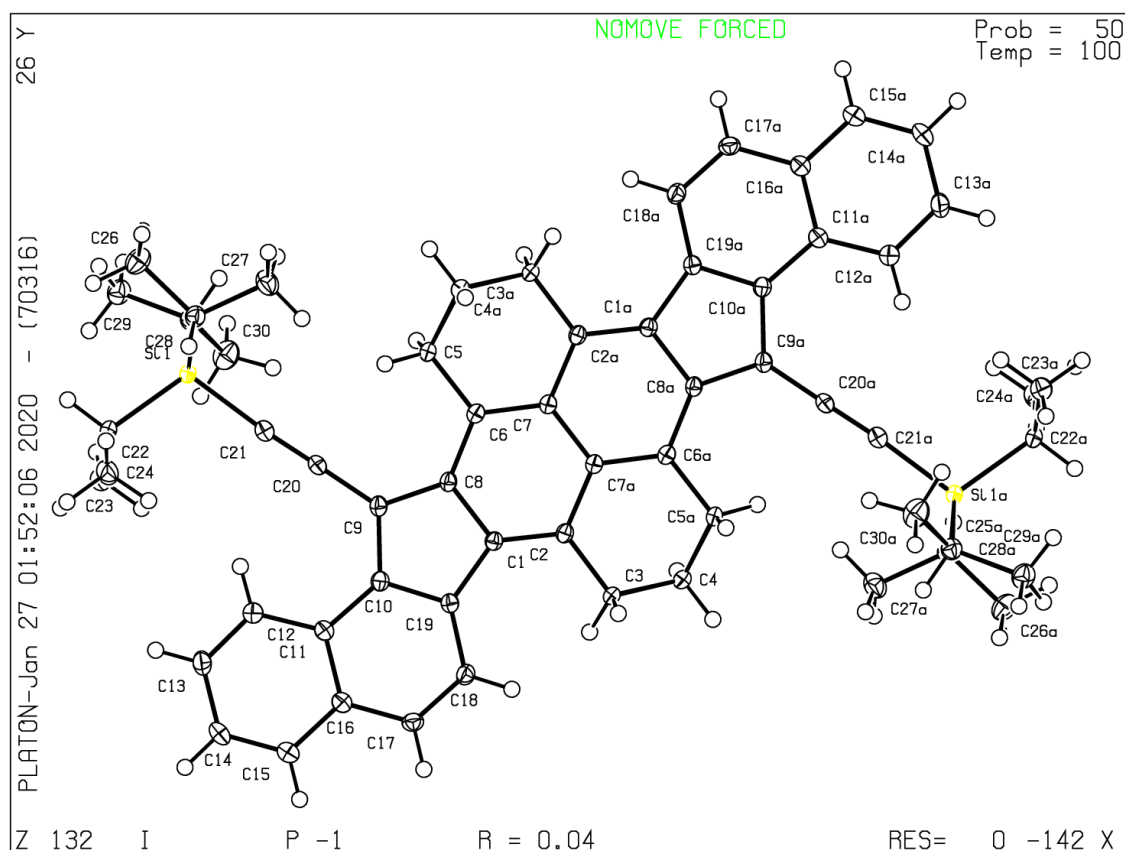

Crystal data for *anti*-HDIP :  $C_{60}H_{66}Si_2$ ,  $M_w = 843.30$ , triclinic, space group  $P-1$ ; dimensions:  $a = 8.2869$  (3) Å,  $b = 9.3544$  (4) Å,  $c = 15.0106$  (7) Å,  $\alpha = 83.361$  (4)°,  $\beta = 81.878$  (4)°,  $\gamma = 89.500$  (3)°,  $V = 1144.18$  (8) Å<sup>3</sup>;  $Z = 1$ ;  $\mu = 0.12$  mm<sup>-1</sup>; 26342 reflections measured at 100 K; independent reflections: 5252 [4265  $F_o > 4\sigma(F_o)$ ]; data were collected up to a  $2\theta_{max}$  value of 54.9° (99.9 % coverage). Number of variables: 286;  $R_1 = 0.041$ ,  $wR_2 = 0.107$ ,  $S = 1.04$ ; highest residual electron density 0.29 e.Å<sup>-3</sup>; CCDC = 1987610.

## VARIABLE TEMPERATURE $^1\text{H}$ NMR of HDIP in *o*-DCB ( $\text{d}_4$ )

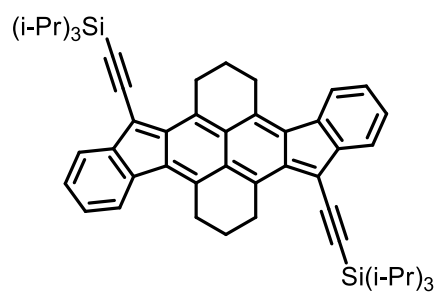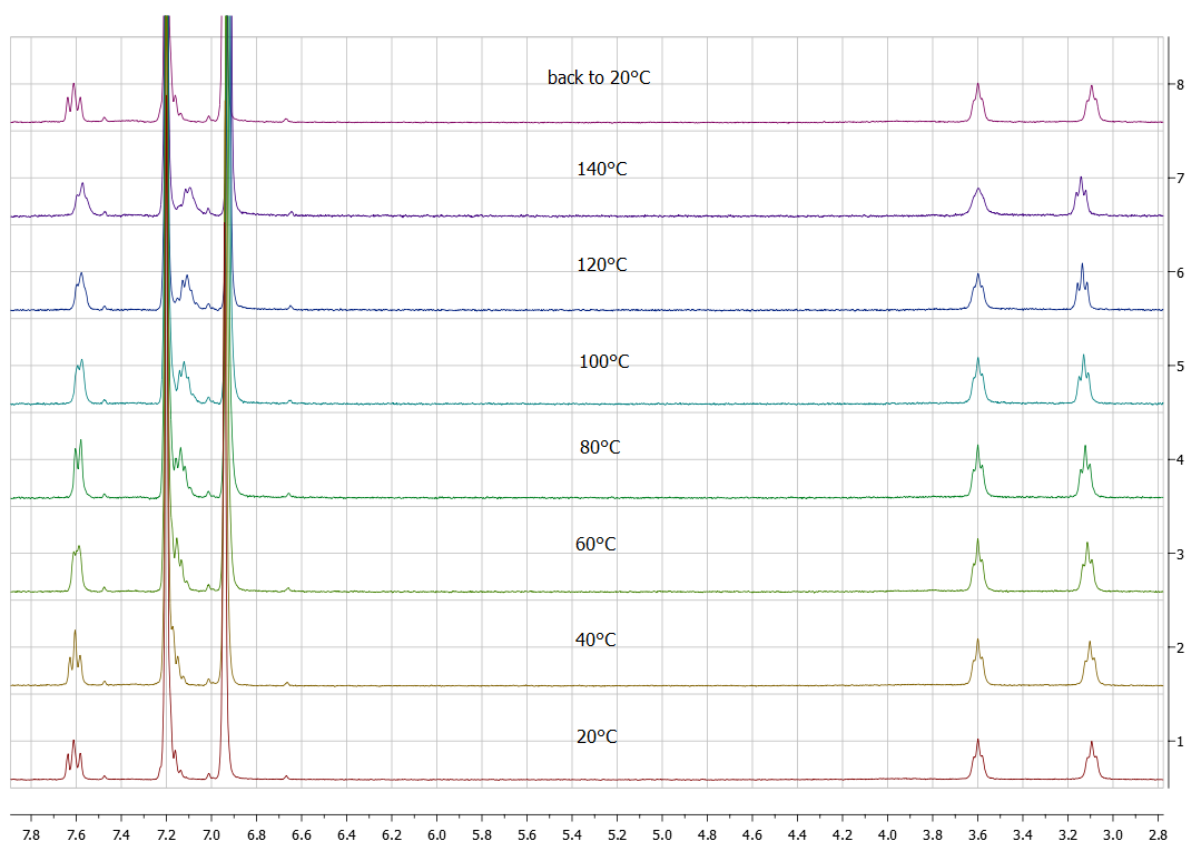

# VARIABLE TEMPERATURE $^1\text{H}$ NMR of *linear*-HDIP in *o*-DCB ( $\text{d}_4$ ) with COSY and NOESY

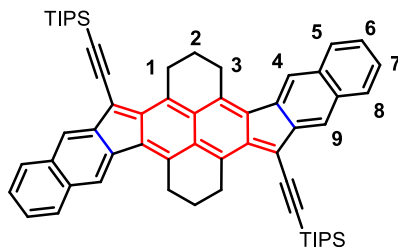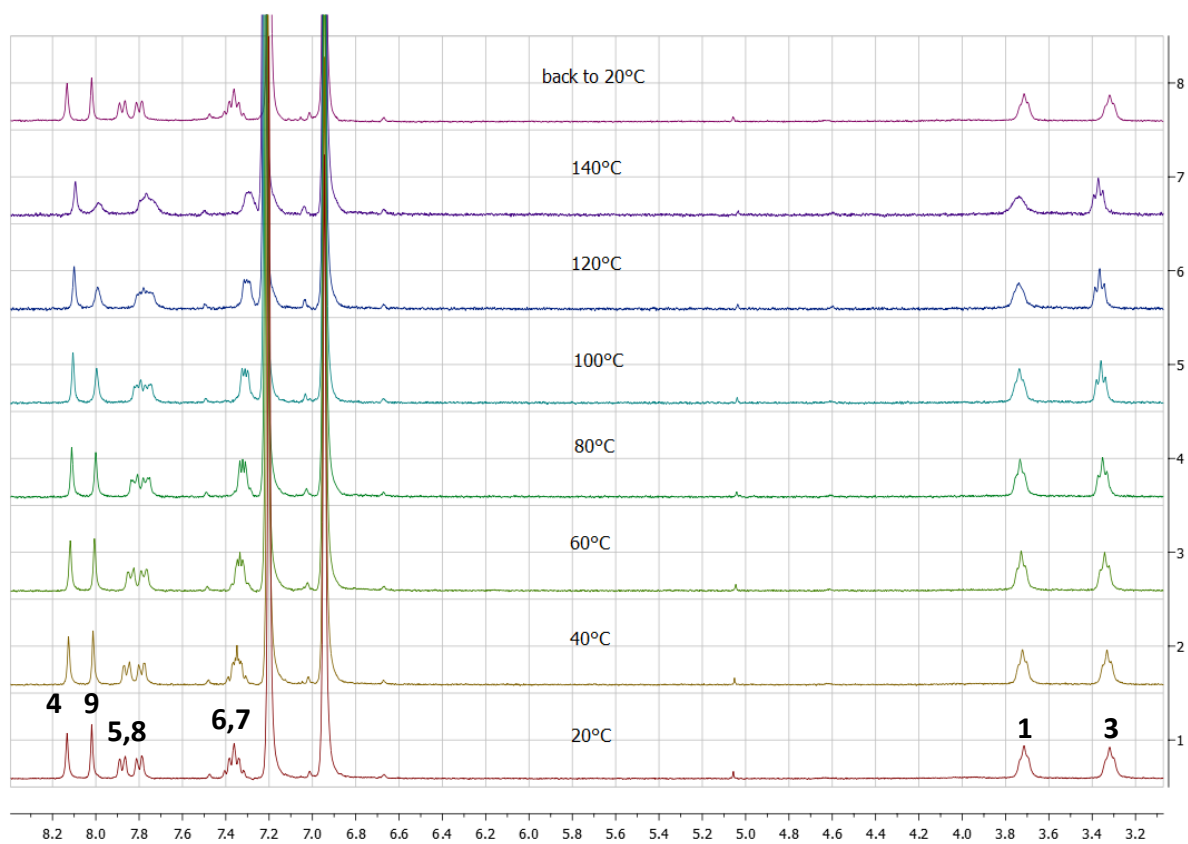

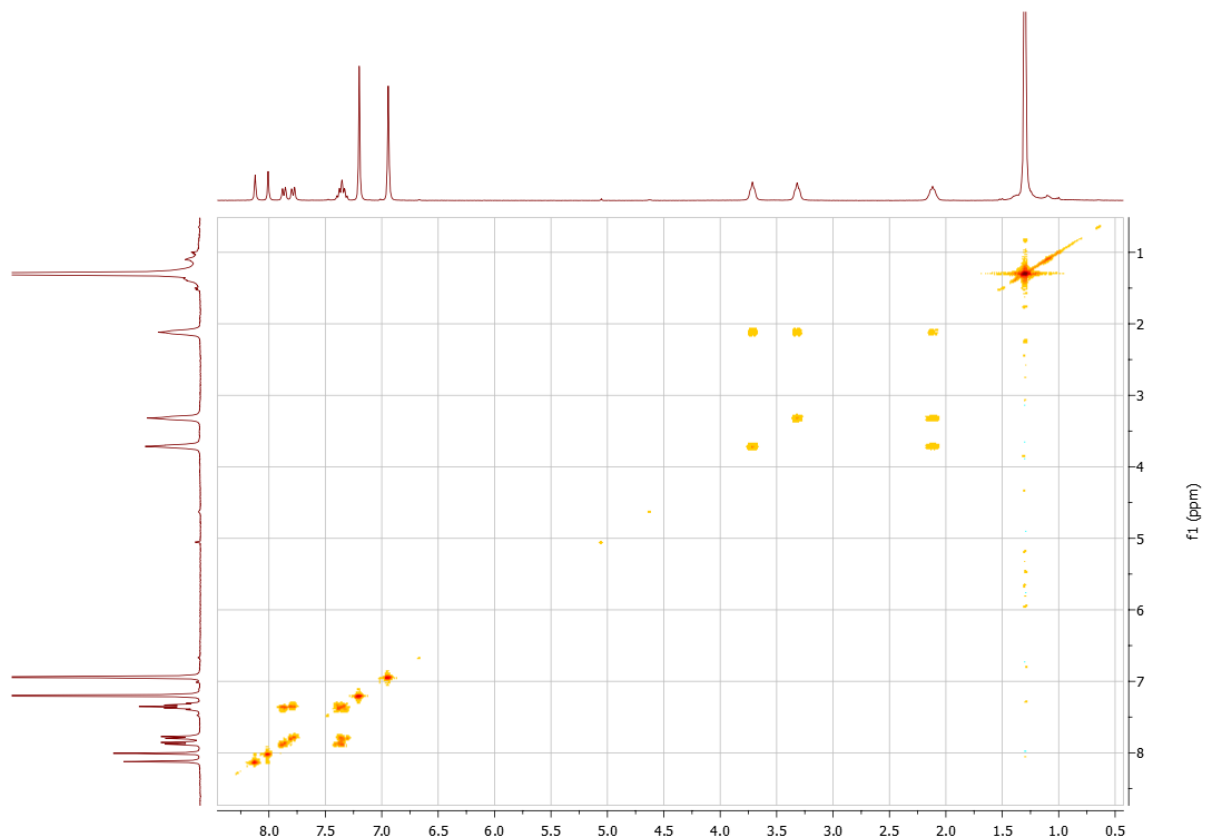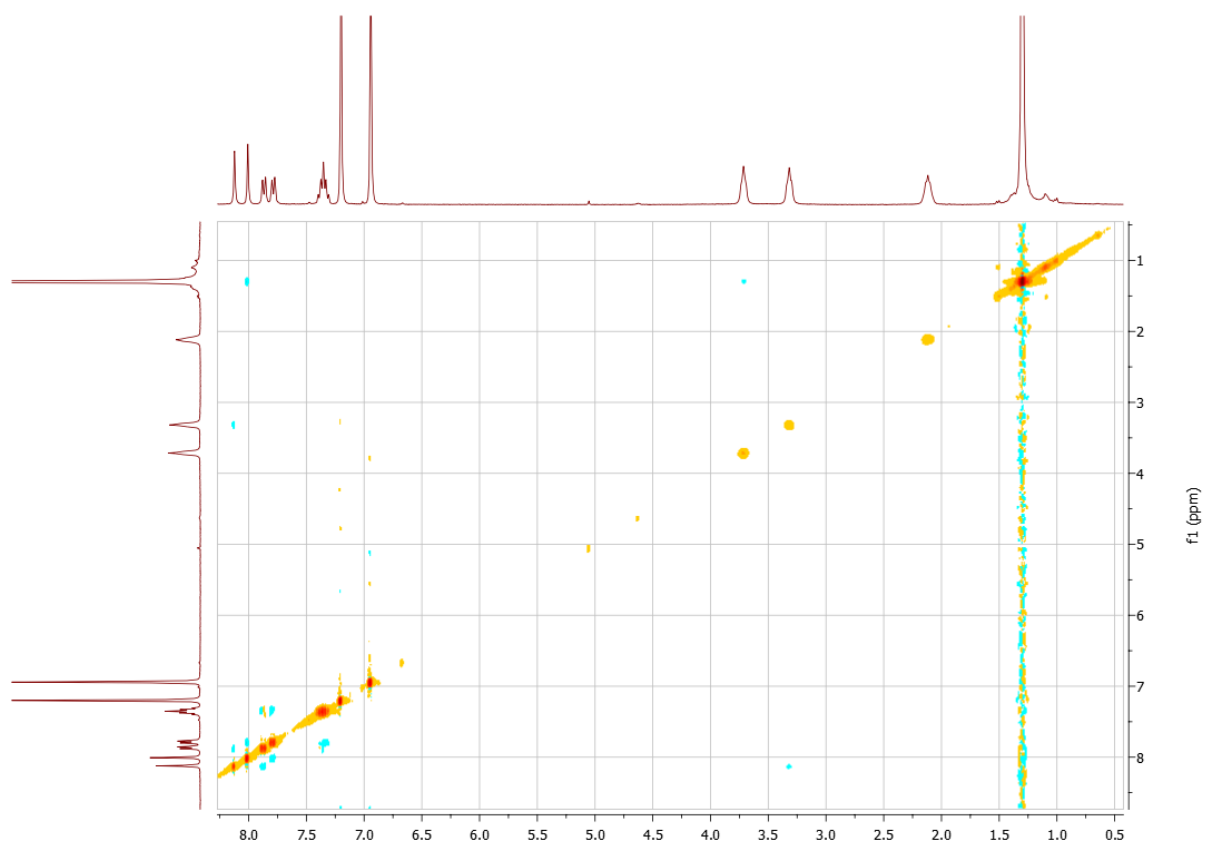

## VARIABLE TEMPERATURE $^1\text{H}$ NMR of *syn*-HDIP in *o*-DCB ( $\text{d}_4$ )

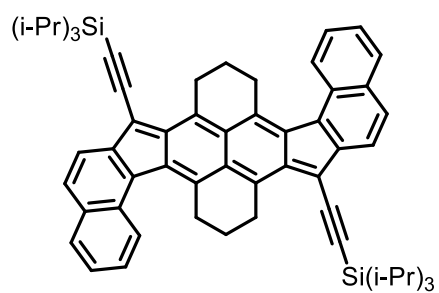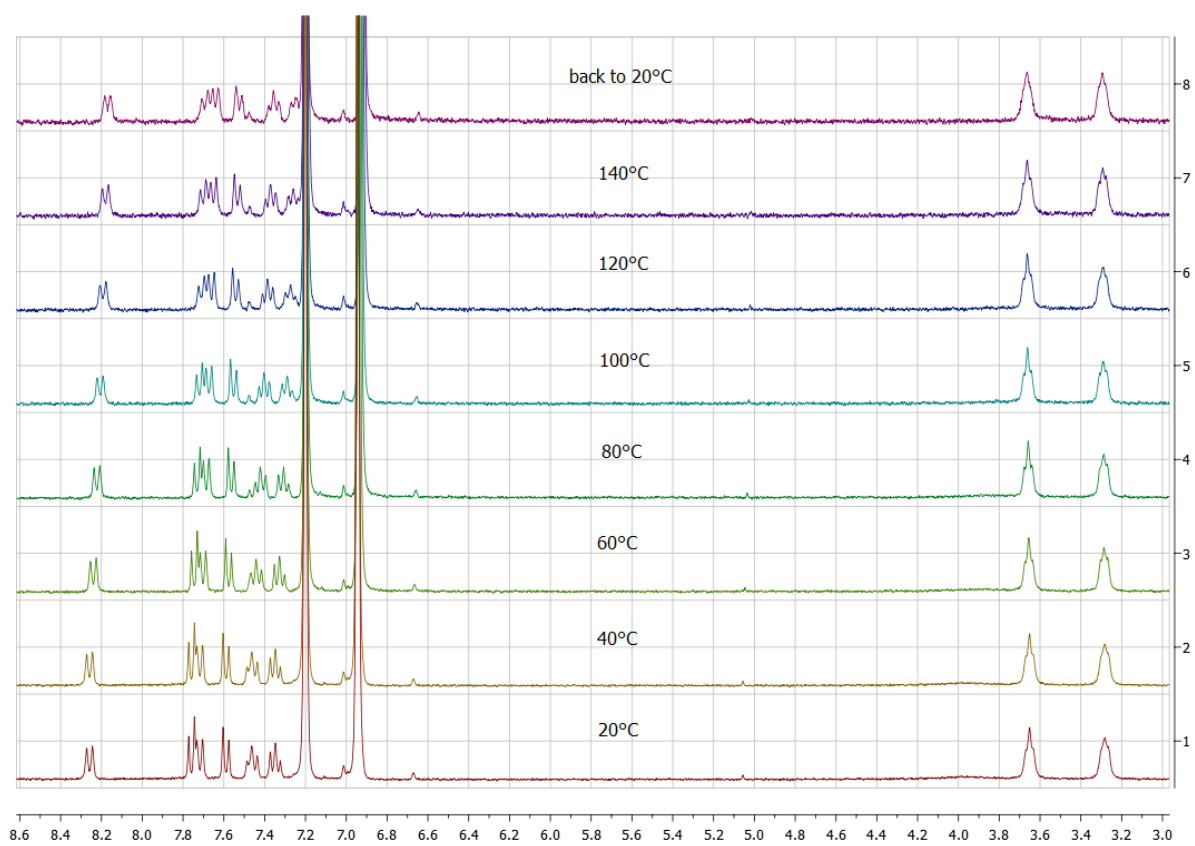

# VARIABLE TEMPERATURE $^1\text{H}$ NMR of *anti*-HDIP in *o*-DCB ( $d_4$ ) with COSY and NOESY

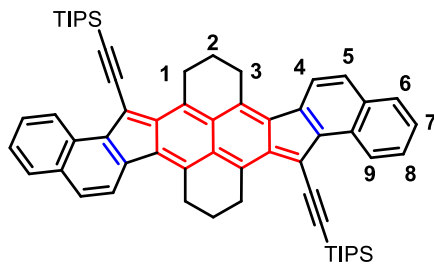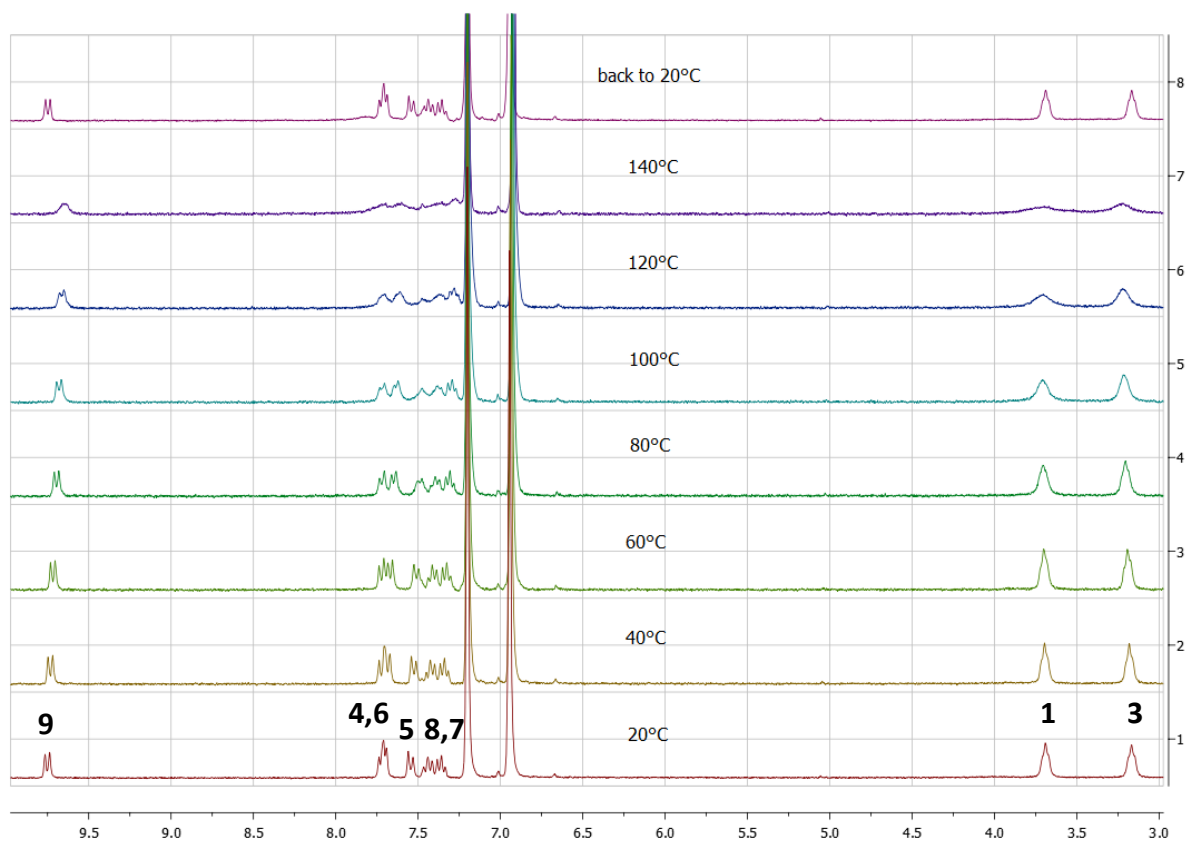

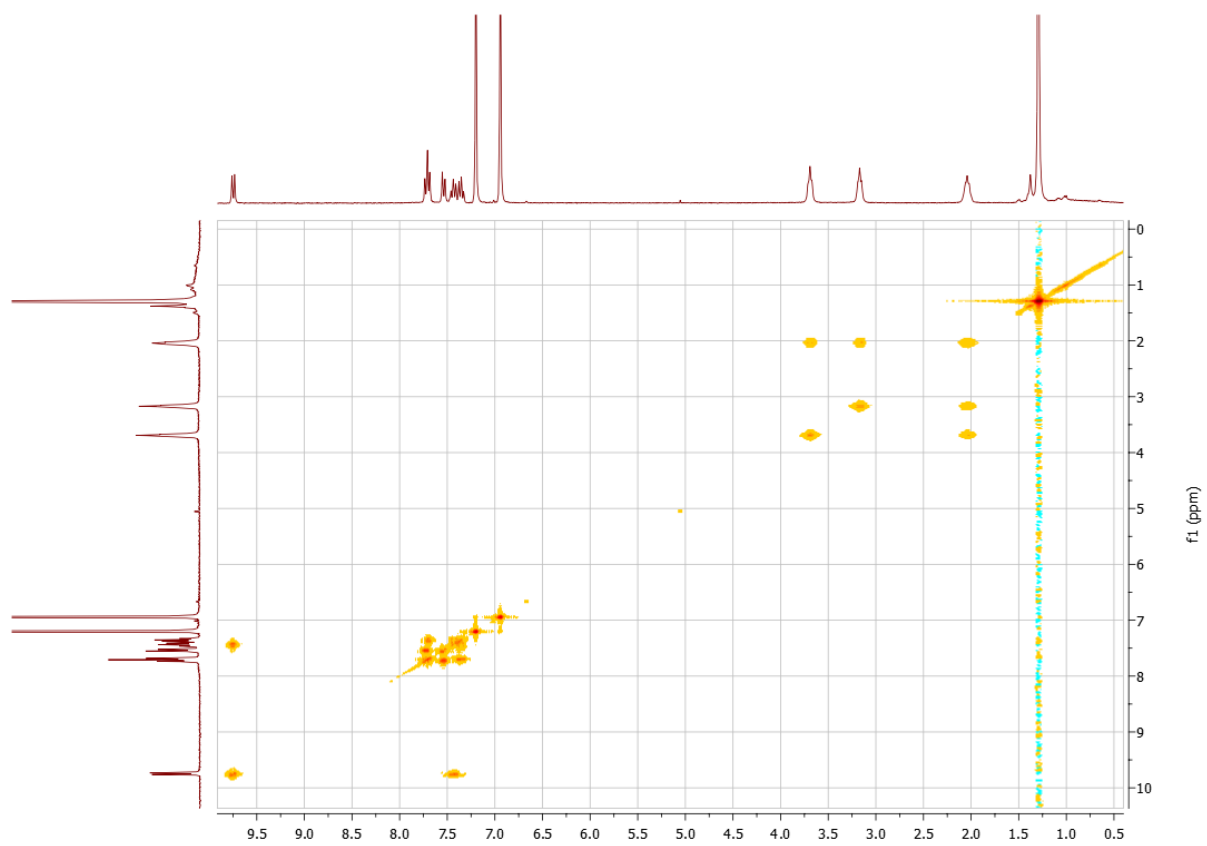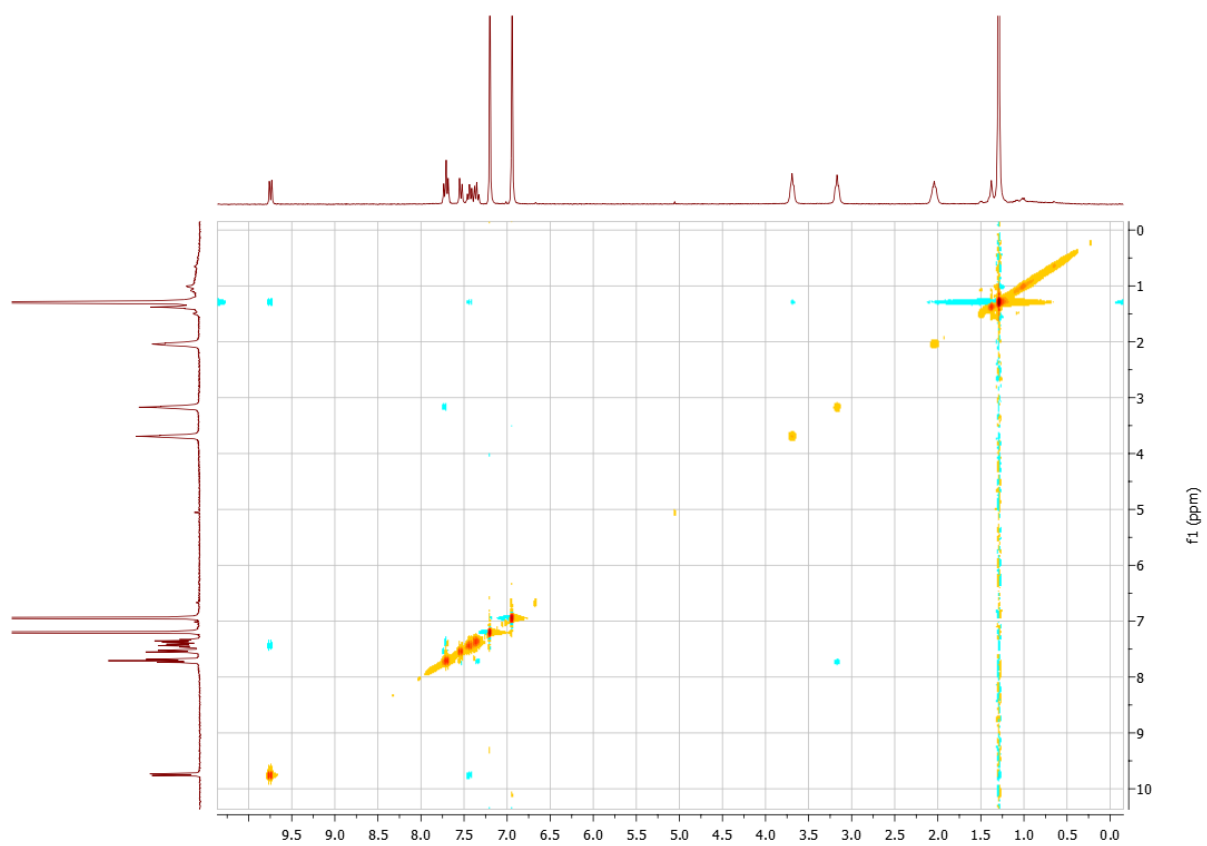



## ESR and SQUID MEASUREMENTS

Magnetic susceptibilities of the samples were measured using a Quantum Design MPMS-XL7 SQUID magnetometer in a temperature range of 200–400 K at an applied magnetic field of 1 T. The magnetic response was corrected with diamagnetic blank from the sample holder measured separately. The diamagnetism of the sample itself was estimated from Pascal's constant. Electron spin resonance (ESR) measurements were carried out on a Bruker ELEXSYS X-band (9.7 GHz) spectrometer. The ESR spectra of the polycrystalline samples were recorded in a temperature range from 200–500 K, where a cryostat (Oxford) was applied using liquid nitrogen. The samples were contained in a glass tube where inner gasses were removed in vacuum and sealed by using flame in order to prevent oxygen containing. Unfortunately, a detectable response derived from the excited spin triplet state in the samples cannot be found in SQUID and ESR results in the measuring temperature range, because the magnetic susceptibility and ESR responses for all the HDIP samples showed anomalous paramagnetic behavior quite similar to those in the previous report.<sup>vi</sup> According to the reference, the anomalous behavior was derived from a small concentration of radical cations generated through exposure to ambient atmosphere (oxygen, water) and light even for extra-purified samples. The broadening ( $\Delta H_{pp} = \sim 15$  G) of ESR signals is supportive of such anomalous behavior, which seems to be a nature of aggregated samples different from a chemically oxidized radical cation showing a sharp signal. The unexpected paramagnetic response was not avoided in our magnetic experiments, which masks the contribution of the inherent excited triplet state in the HDIP singlet biradicals.

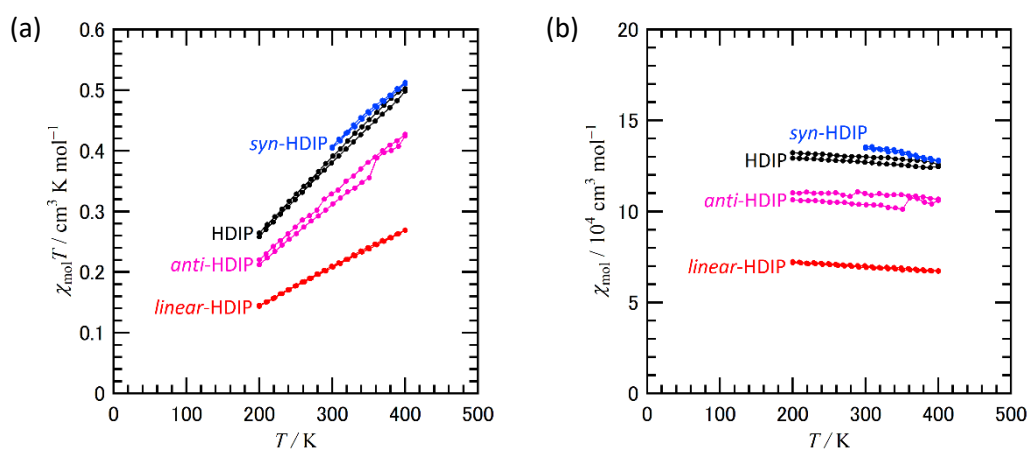

**Figure S1.** Temperature dependences (a) of  $\chi_{\text{mol}} T$  and (b) of  $\chi_{\text{mol}}$  for the HDIP derivatives.

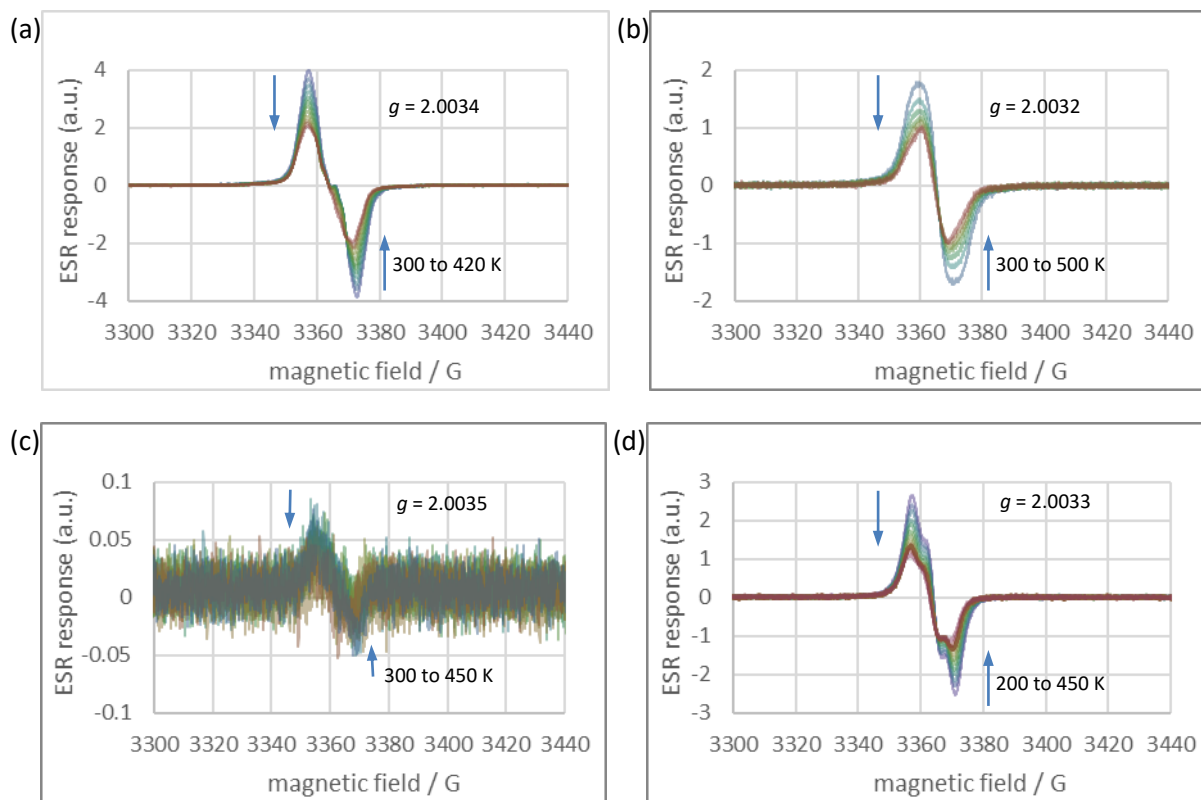

**Figure S2.** Temperature dependences of ESR spectra on the polycrystalline samples of (a) HDIP, (b) *linear*-HDIP, (c) *syn*-HDIP, and (d) *anti*-HDIP.

## STABILITY TESTS OF HDIP DERIVATIVES

The stability tests were performed in 100 ml volumetric flask containing a toluene solution of the materials at a concentration of 26.6  $\mu\text{M}$ . Air bubbling on the toluene solution for 30 min and 1 hour left with open bottle prior the dilution was done. All the samples were prepared at the same time and the volumetric flask with capped on were left on the bench with light on. Aliquots of 2.5 mL were taken at different times and were put in the cuvette for recording UV/vis absorption spectra.

Change of UV/vis absorption spectra over time (left) and plot of  $A_t/A_0$  at their own  $\lambda_{\text{max}}$  nm vs time (right)

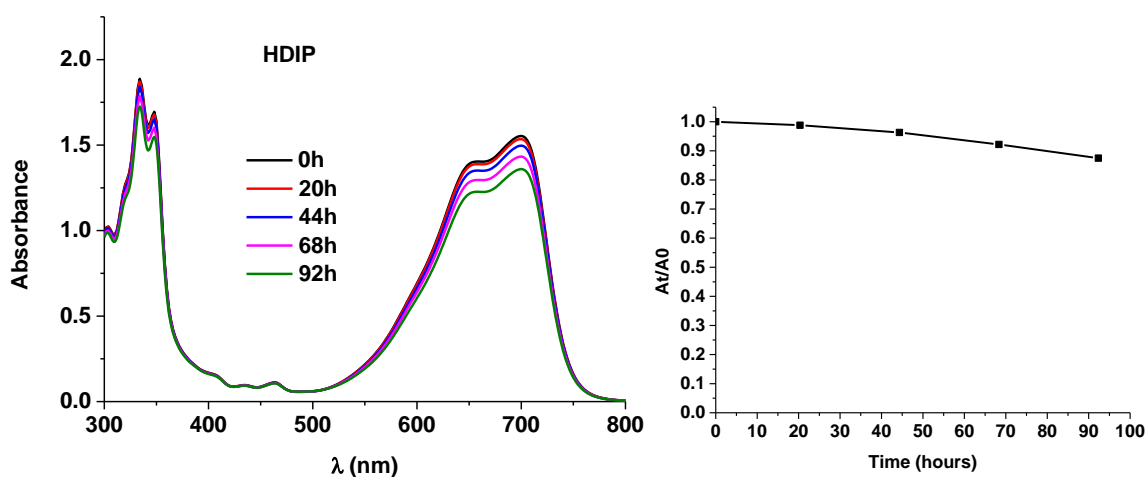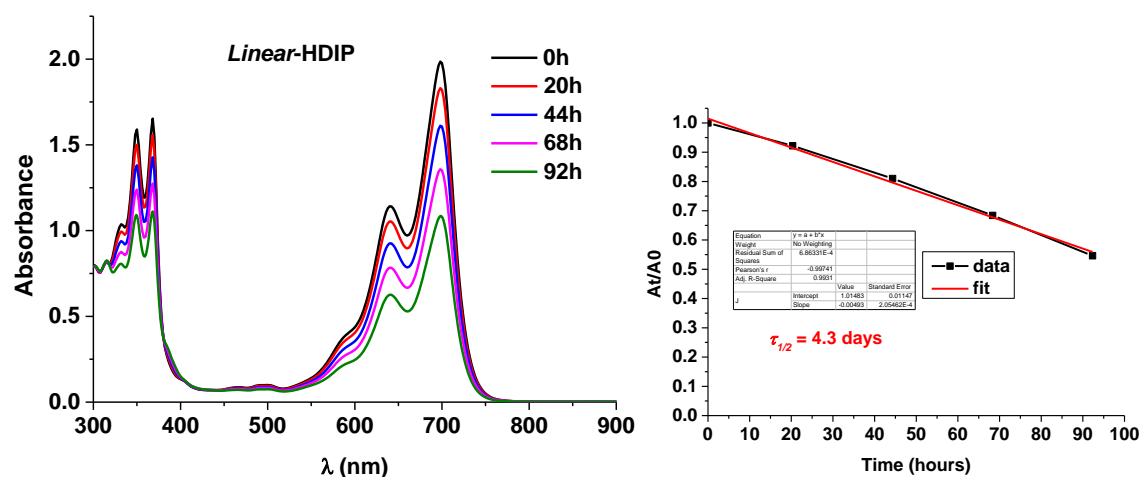

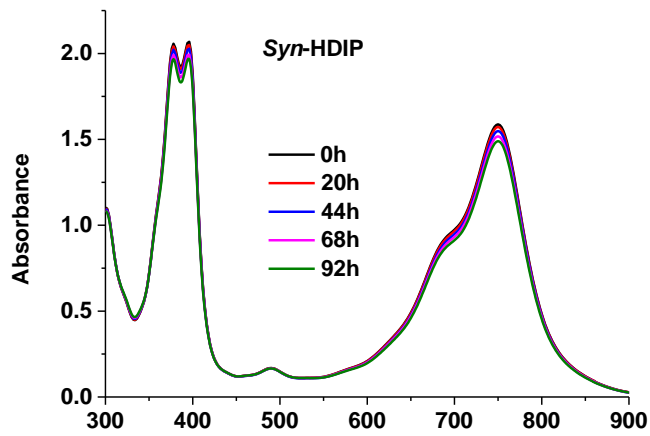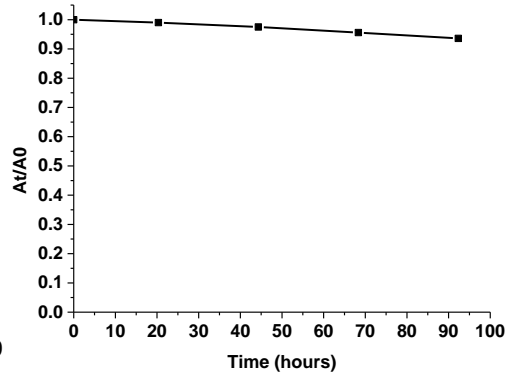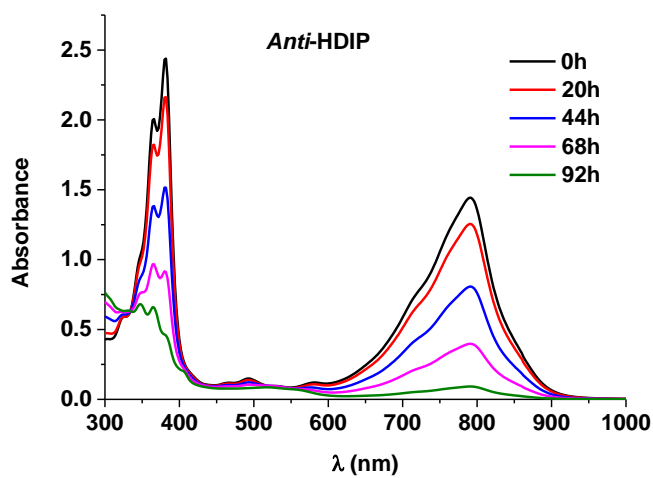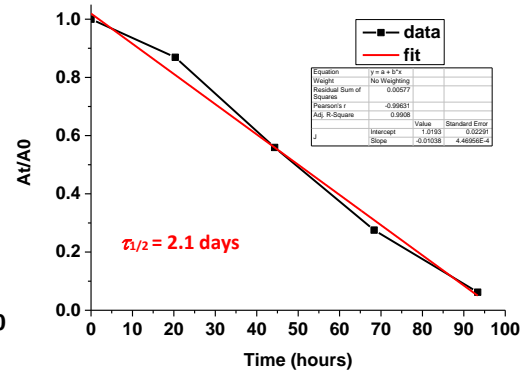

## THERMOGRAVIMETRY ANALYSIS OF HDIP derivatives under N<sub>2</sub>

---

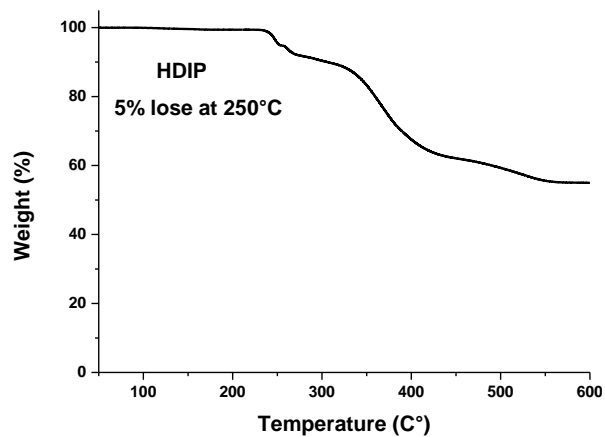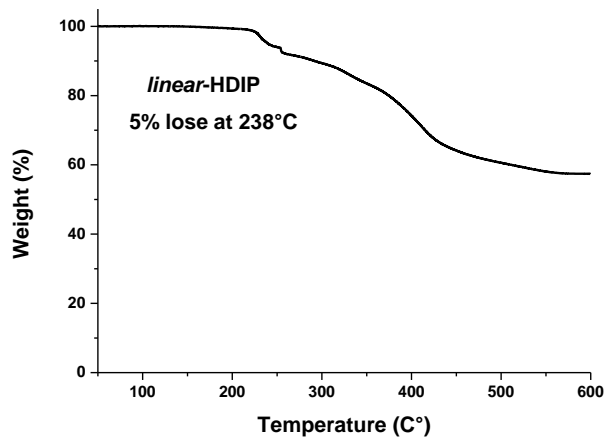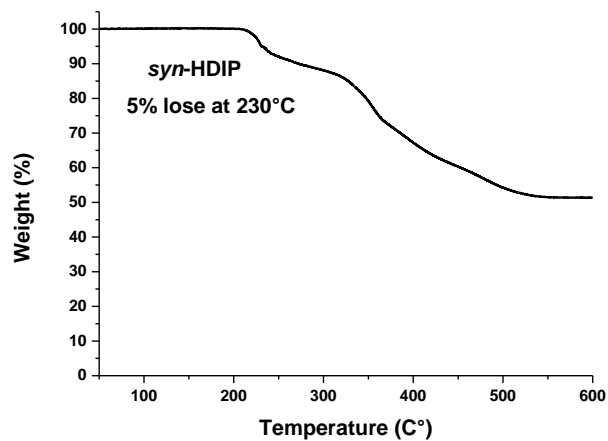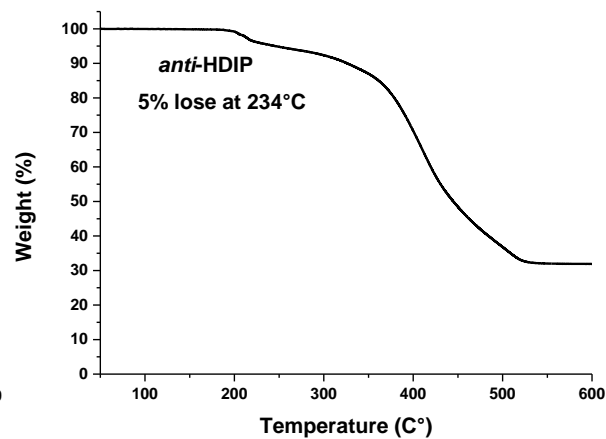

## THEORETICAL CALCULATIONS

---

The computations were mainly performed using the computer facilities at the Research Institute for Information Technology, Kyushu University. Molecular orbital calculations were performed using the program Gaussian 16 except for odd-electron density and NICS calculations.<sup>vii</sup> The geometries were optimized at the B3LYP/6-311G(d,p) level for the singlet and UB3LYP/6-311G(d,p) for the triplet, and these optimized structures are used for the further calculations of the singlet and triplet, respectively, unless otherwise noted according to the literature.<sup>viii</sup> The presence of energy minima for the geometry optimization was confirmed by the absence of imaginary modes (no imaginary frequencies). To numerically achieve accurate values, we have used a fine grid. The triisopropylsilyl (TIPS) groups were substituted with trimethylsilyl (TMS) groups. We adopted four model systems, which are main aromatic backbone without substituents (native FF series), with TMS-acetylene groups (FF series), with propane groups (native HDIP series), and with propane and TMS-acetylene groups (HDIP series) (Figure S1). The singlet biradical was investigated by re-optimizing the geometry using open-shell broken-symmetry calculations at the UB3LYP/6-311G(d,p) level. The structures were also optimized at the CAM-B3LYP/6-311+G(d,p), broken symmetry UCAM-B3LYP/6-311+G(d,p), and UCAM-B3LYP/6-311+G(d,p) for closed-shell singlet, open-shell singlet, and triplet, respectively.

The singlet biradical factor was also calculated by the natural orbital occupation number (NOON) of the LUMO in a projected spin-unrestricted Hartree-Fock (PUHF) calculation using 6-31+G(d,p) basis set.<sup>ix</sup> The broken symmetry PUHF/6-31+G(d,p) calculations gave LUMO occupation number. According to the Yamaguchi scheme,<sup>x</sup> the index for singlet biradical character is expressed as

$$y_i = 1 - \frac{2T_i}{1 + T_i^2}$$

where  $T_i$  is the orbital overlap between the corresponding orbital pairs and it can be presented using the NOON of HOMO and LUMO.

$$T_i = \frac{n_{HOMO} - n_{LUMO}}{2}$$

The diradical characters by the theoretical calculation are listed in Table S1.

The TD-DFT calculations were conducted at the B3LYP/6-311+G(d,p) level for the excited states calculations.

Odd-electron density distribution were calculated using the program Multiwfn<sup>xi</sup>

NICS calculations were performed using Gaussian 09 and Aroma 1.0.<sup>xii</sup> NICS values employ  $\sigma$ -only model to obtain the effect of the  $\pi$  contribution only. NICS(0) $\pi_{zz}$ , NICS(1) $\pi_{zz}$ , and NICS(1.7) $\pi_{zz}$ , where the dummy atoms are positioned ring center at 0 Å, 1 Å, and 1.7 Å above the ring, respectively. The NICS values were estimated using the GIAO-B3LYP/6-311+G(d,p) methods for the structures calculated at the B3LYP basis set and the GIAO-CAM-B3LYP/6-311+G(d,p) methods for the structures calculated at the CAM-B3LYP basis set, and these data are summarized in Table S5 and S6.

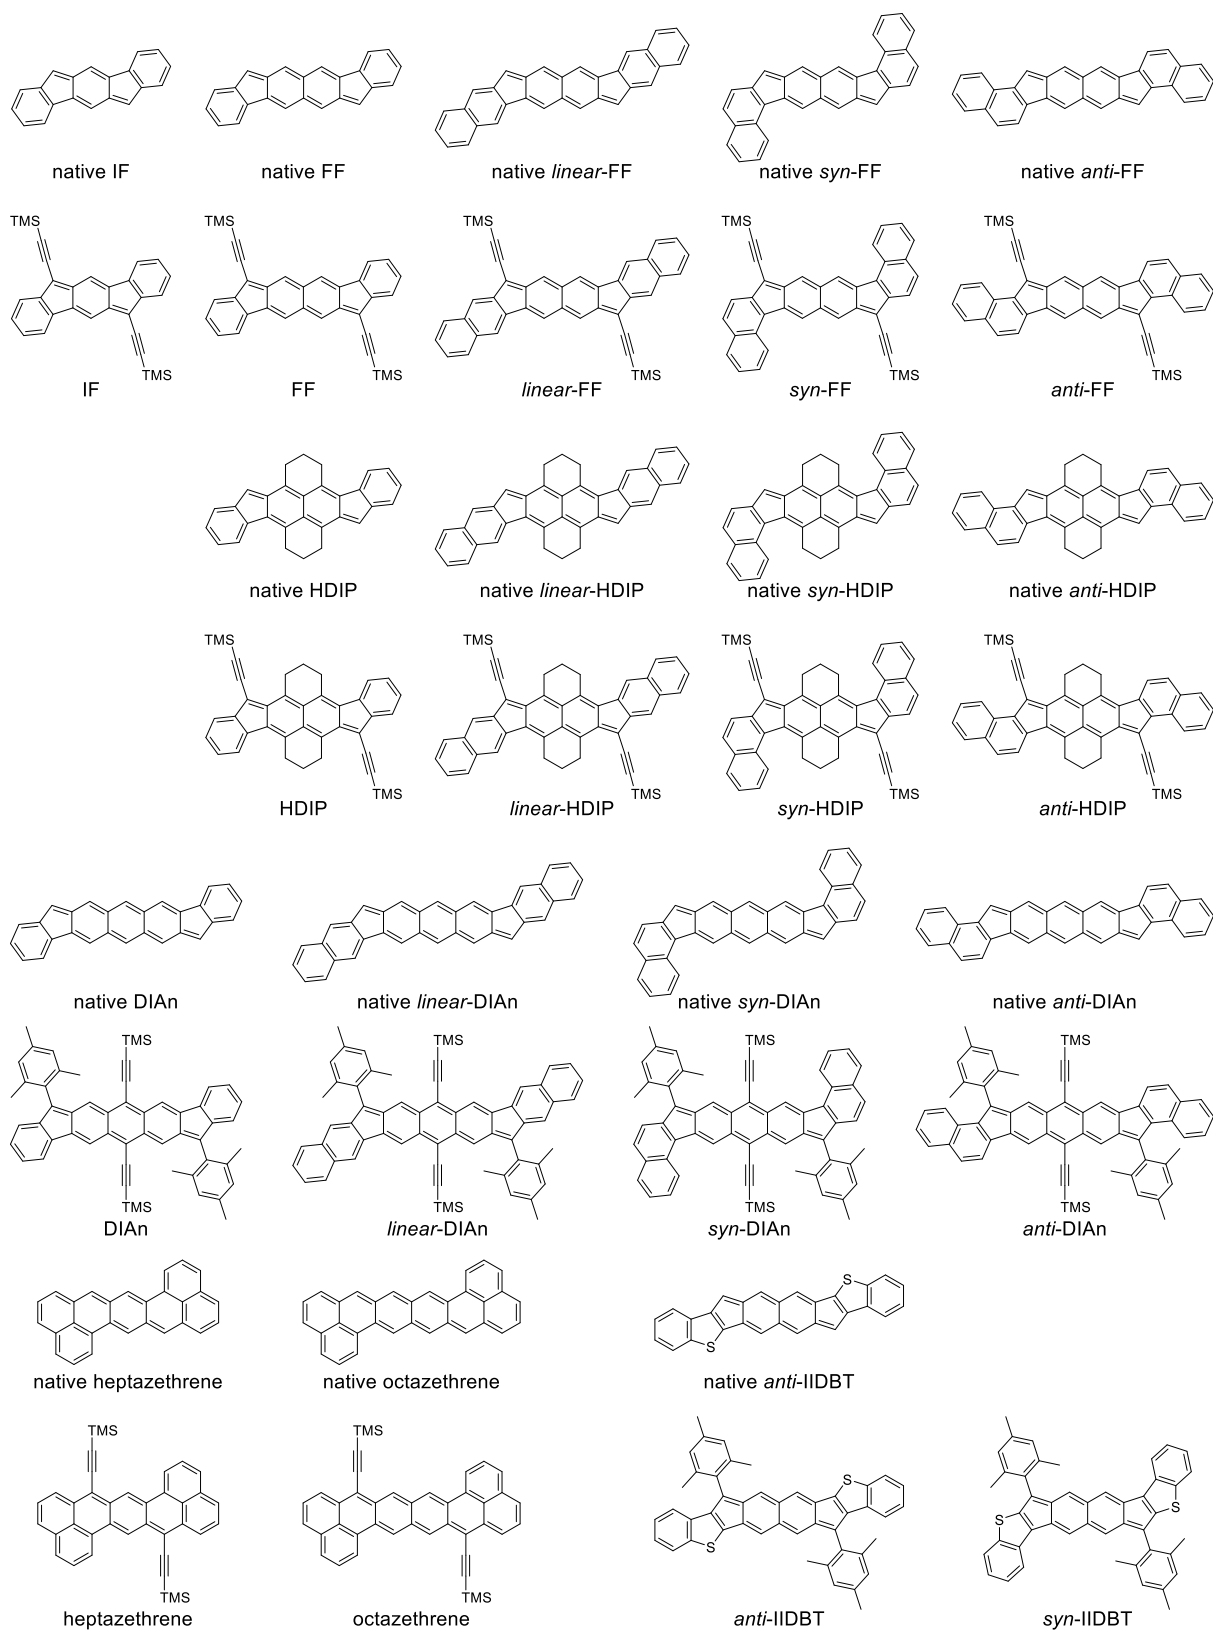

**Figure S3.** Chemical structures of the calculated molecules





| Bond     | X-ray            | RB3LYP       | RB3LYP – XR  | UB3LYP       |
|----------|------------------|--------------|--------------|--------------|
| a        | 1.454 (2)        | 1.455        | 0.001        | 1.453        |
| <b>b</b> | <b>1.406 (2)</b> | <b>1.409</b> | <b>0.003</b> | <b>1.419</b> |
| c        | 1.415 (2)        | 1.421        | 0.006        | 1.413        |
| d        | 1.391 (2)        | 1.399        | 0.008        | 1.407        |
| e        | 1.458 (2)        | 1.462        | 0.004        | 1.457        |
| f        | 1.451 (2)        | 1.453        | 0.002        | 1.449        |
| g        | 1.362 (2)        | 1.371        | 0.009        | 1.373        |
| h        | 1.447 (2)        | 1.454        | 0.007        | 1.451        |

|RB3LYP-XR| corresponds to the bond length difference between the structure optimized at RB3LYP and the X-ray structure.

| Bond     | X-ray            | RCAM-B3LYP   | UCAM-B3LYP   | <b>RUCAM</b><br>RCAM*0.45 +UCAM*0.55 | <b>RUCAM</b> –XR |
|----------|------------------|--------------|--------------|--------------------------------------|------------------|
| a        | 1.454 (2)        | 1.459        | 1.450        | 1.453                                | 0.001            |
| <b>b</b> | <b>1.406 (2)</b> | <b>1.384</b> | <b>1.424</b> | <b>1.406</b>                         | <b>0.000</b>     |
| c        | 1.415 (2)        | 1.431        | 1.399        | 1.413                                | 0.003            |
| d        | 1.391 (2)        | 1.378        | 1.411        | 1.396                                | 0.005            |
| e        | 1.458 (2)        | 1.465        | 1.442        | 1.452                                | 0.004            |
| f        | 1.451 (2)        | 1.459        | 1.443        | 1.450                                | 0.001            |
| g        | 1.362 (2)        | 1.356        | 1.365        | 1.361                                | 0.001            |
| h        | 1.447 (2)        | 1.456        | 1.442        | 1.448                                | 0.001            |

|**RUCAM**–XR| corresponds to the bond lengths difference between the resonance hybrid between CAM structures as RCAM\*0.45 +UCAM\*0.55 and the X-ray structure.

Accordingly,  $y_0$  is in the range of  $0.55 \pm 0.05$  by into account the standard deviation of the apical bond length.

$y_0$  is of 0.56 calculated at PUHF from R-BL3YP structure.

$y_0$  is of 0.54 calculated at PUHF from X-ray structure.

## Linear-HDIP: Bond length comparison of X-ray structure and calculations

---

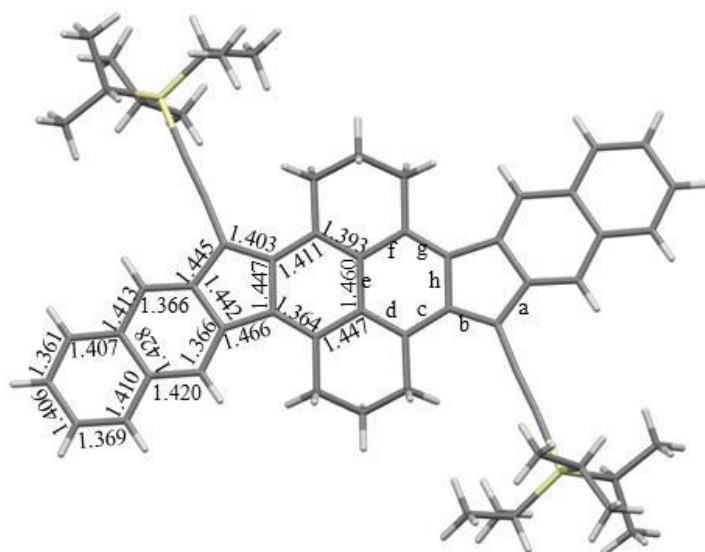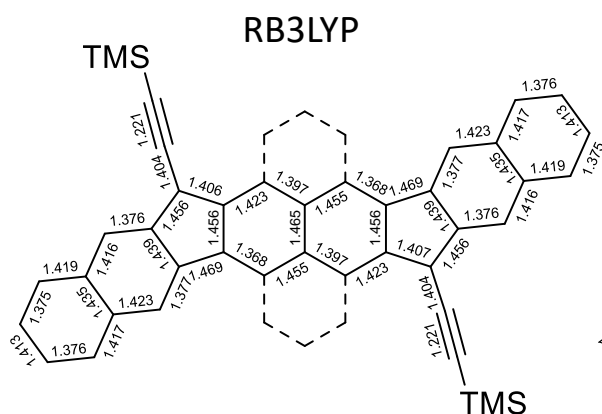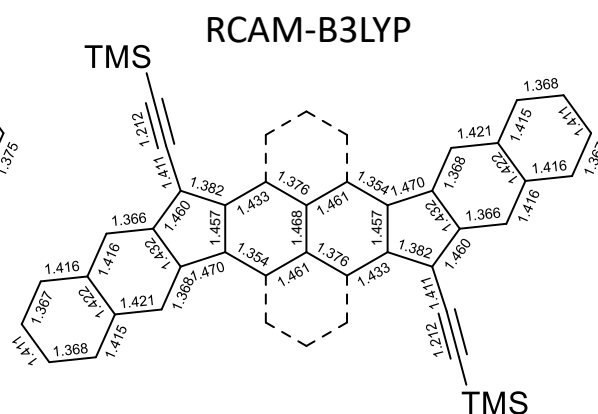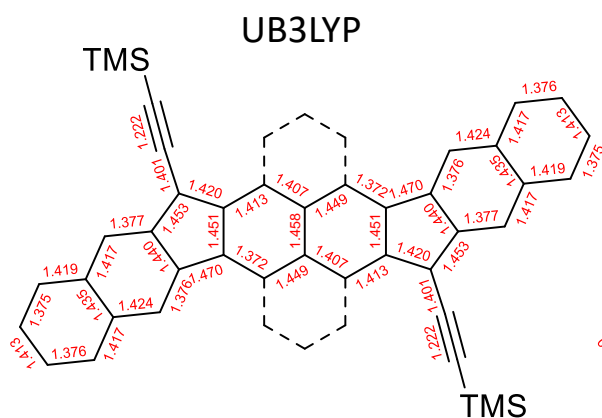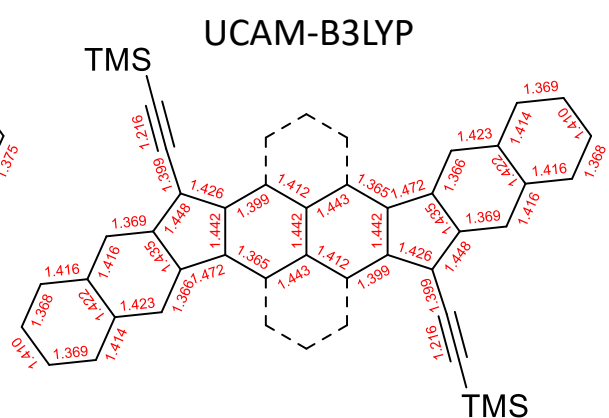

| Bond     | X-ray            | RB3LYP       | RB3LYP – XR  | UB3LYP       |
|----------|------------------|--------------|--------------|--------------|
| a        | 1.445 (3)        | 1.456        | 0.011        | 1.453        |
| <b>b</b> | <b>1.403 (3)</b> | <b>1.406</b> | <b>0.003</b> | <b>1.420</b> |
| c        | 1.411 (3)        | 1.423        | 0.012        | 1.413        |
| d        | 1.393 (3)        | 1.397        | 0.004        | 1.407        |
| e        | 1.460 (4)        | 1.465        | 0.005        | 1.458        |
| f        | 1.447 (3)        | 1.455        | 0.008        | 1.449        |
| g        | 1.364 (3)        | 1.368        | 0.004        | 1.372        |
| h        | 1.447 (3)        | 1.456        | 0.009        | 1.451        |

|RB3LYP-XR| corresponds to the bond length difference between the structure optimized at RB3LYP and the X-ray structure.

| Bond     | X-ray            | RCAM-B3LYP   | UCAM-B3LYP   | <b>RUCAM</b><br>RCAM*0.52 +UCAM*0.48 | RUCAM–XR     |
|----------|------------------|--------------|--------------|--------------------------------------|--------------|
| a        | 1.445 (3)        | 1.460        | 1.448        | 1.454                                | 0.009        |
| <b>b</b> | <b>1.403 (3)</b> | <b>1.382</b> | <b>1.426</b> | <b>1.403</b>                         | <b>0.000</b> |
| c        | 1.411 (3)        | 1.433        | 1.399        | 1.417                                | 0.006        |
| d        | 1.393 (3)        | 1.376        | 1.412        | 1.393                                | 0.000        |
| e        | 1.460 (4)        | 1.468        | 1.442        | 1.456                                | 0.004        |
| f        | 1.447 (3)        | 1.461        | 1.443        | 1.452                                | 0.005        |
| g        | 1.364 (3)        | 1.354        | 1.365        | 1.359                                | 0.005        |
| h        | 1.447 (3)        | 1.457        | 1.442        | 1.450                                | 0.003        |

|RUCAM–XR| corresponds to the bond lengths difference between the resonance hybrid between CAM structures as RCAM\*0.52 +UCAM\*0.48 and the X-ray structure.

Accordingly,  $y_0$  is in the range of  $0.48 \pm 0.07$  by into account the standard deviation of the apical bond length.

$y_0$  is of 0.58 calculated at PUHF from R-BL3YP structure.

$y_0$  is of 0.58 calculated at PUHF from X-ray structure.



| Bond     | X-ray            | RB3LYP       | RB3LYP – XR  | UB3LYP       |
|----------|------------------|--------------|--------------|--------------|
| a        | 1.443 (2)        | 1.446        | 0.003        | 1.445        |
| <b>b</b> | <b>1.400 (2)</b> | <b>1.407</b> | <b>0.007</b> | <b>1.409</b> |
| c        | 1.408 (2)        | 1.416        | 0.008        | 1.414        |
| d        | 1.394 (2)        | 1.400        | 0.006        | 1.402        |
| e        | 1.455 (2)        | 1.457        | 0.002        | 1.456        |
| f        | 1.449 (2)        | 1.454        | 0.005        | 1.453        |
| g        | 1.369 (2)        | 1.38         | 0.011        | 1.381        |
| h        | 1.456 (2)        | 1.458        | 0.002        | 1.457        |

|RB3LYP-XR| corresponds to the bond length difference between the structure optimized at RB3LYP and the X-ray structure.

| Bond     | X-ray            | RCAM-B3LYP   | UCAM-B3LYP   | <b>RUCAM</b><br>RCAM*0.47 +UCAM*0.53 | <b>RUCAM</b> –XR |
|----------|------------------|--------------|--------------|--------------------------------------|------------------|
| a        | 1.443 (2)        | 1.451        | 1.442        | 1.446                                | 0.003            |
| <b>b</b> | <b>1.400 (2)</b> | <b>1.382</b> | <b>1.416</b> | <b>1.400</b>                         | <b>0.000</b>     |
| c        | 1.408 (2)        | 1.427        | 1.399        | 1.412                                | 0.004            |
| d        | 1.394 (2)        | 1.377        | 1.407        | 1.393                                | 0.001            |
| e        | 1.455 (2)        | 1.46         | 1.44         | 1.449                                | 0.005            |
| f        | 1.449 (2)        | 1.462        | 1.449        | 1.455                                | 0.006            |
| g        | 1.369 (2)        | 1.364        | 1.371        | 1.368                                | 0.001            |
| h        | 1.456 (2)        | 1.459        | 1.447        | 1.452                                | 0.004            |

|**RUCAM**–XR| corresponds to the bond lengths difference between the resonance hybrid between CAM structures as RCAM\*0.47 +UCAM\*0.53 and the X-ray structure.

Accordingly,  $y_0$  is in the range of  $0.53 \pm 0.05$  by into account the standard deviation of the apical bond length.

$y_0$  is of 0.59 calculated at PUHF from R-BL3YP structure.

$y_0$  is of 0.56 calculated at PUHF from X-ray structure.

## Anti-HDIP: Bond length comparison of X-ray structure and calculations

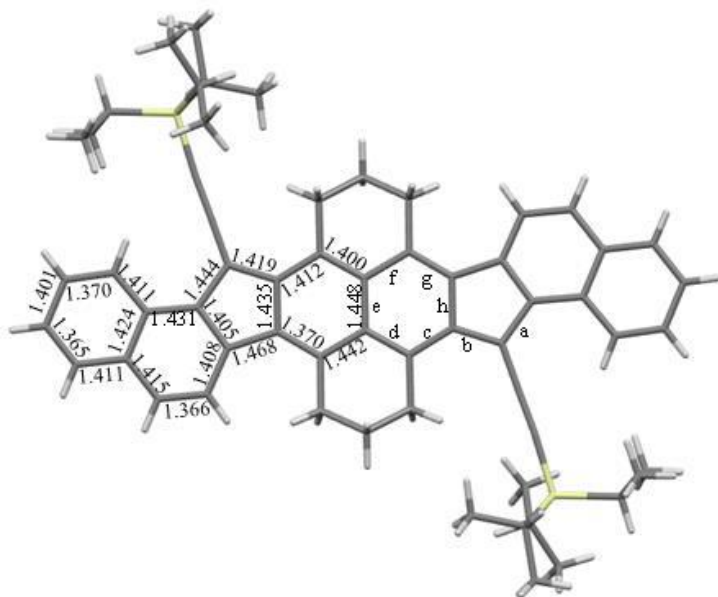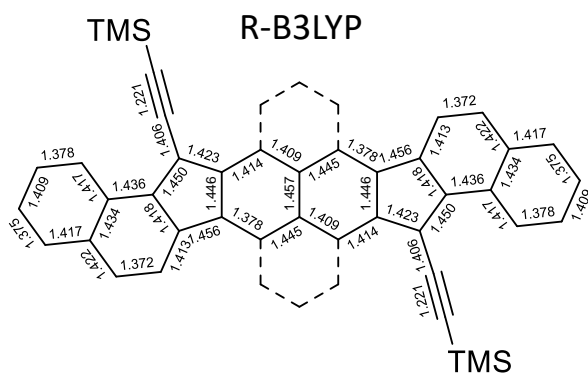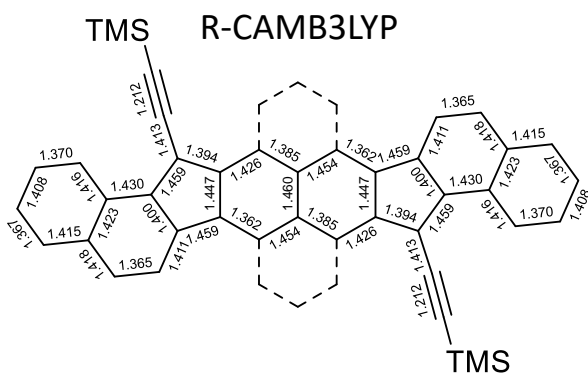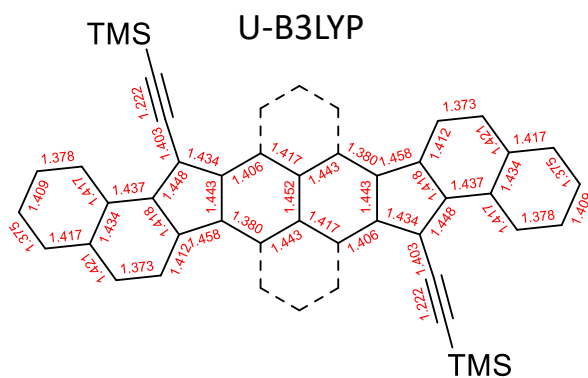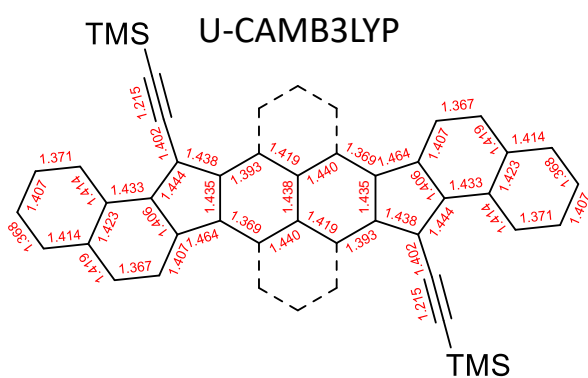

| Bond | X-ray     | RB3LYP | RB3LYP – XR | UB3LYP |
|------|-----------|--------|-------------|--------|
| a    | 1.444 (2) | 1.45   | 0.006       | 1.448  |

|          |           |       |       |       |
|----------|-----------|-------|-------|-------|
| <b>b</b> | 1.419 (2) | 1.423 | 0.004 | 1.434 |
| c        | 1.412 (2) | 1.414 | 0.002 | 1.406 |
| d        | 1.400 (2) | 1.409 | 0.009 | 1.417 |
| e        | 1.448 (2) | 1.457 | 0.009 | 1.452 |
| f        | 1.442 (2) | 1.445 | 0.003 | 1.443 |
| g        | 1.370 (2) | 1.378 | 0.008 | 1.38  |
| h        | 1.435 (2) | 1.446 | 0.011 | 1.443 |

|RB3LYP-XR| corresponds to the bond length difference between the structure optimized at RB3LYP and the X-ray structure.

| Bond     | X-ray     | RCAM-B3LYP | UCAM-B3LYP | RUCAM<br>RCAM*0.43 +UCAM*0.57 | RUCAM-XR |
|----------|-----------|------------|------------|-------------------------------|----------|
| a        | 1.444 (2) | 1.459      | 1.444      | 1.450                         | 0.006    |
| <b>b</b> | 1.419 (2) | 1.394      | 1.438      | 1.419                         | 0.000    |
| c        | 1.412 (2) | 1.426      | 1.393      | 1.407                         | 0.005    |
| d        | 1.400 (2) | 1.385      | 1.419      | 1.404                         | 0.004    |
| e        | 1.448 (2) | 1.46       | 1.438      | 1.447                         | 0.001    |
| f        | 1.442 (2) | 1.454      | 1.44       | 1.446                         | 0.004    |
| g        | 1.370 (2) | 1.362      | 1.369      | 1.366                         | 0.004    |
| h        | 1.435 (2) | 1.447      | 1.435      | 1.440                         | 0.005    |

|RUCAM-XR| corresponds to the bond lengths difference between the resonance hybrid between CAM structures as RCAM\*0.43 +UCAM\*0.57 and the X-ray structure.

Accordingly,  $y_0$  is in the range of  $0.57 \pm 0.05$  by taking into account the standard deviation of the apical bond length.

$y_0$  is of 0.65 calculated at PUHF from R-BL3YP structure.

$y_0$  is of 0.62 calculated at PUHF from X-ray structure.

# TIPS-octazethrene: Bond length comparison of X-ray structure and calculations

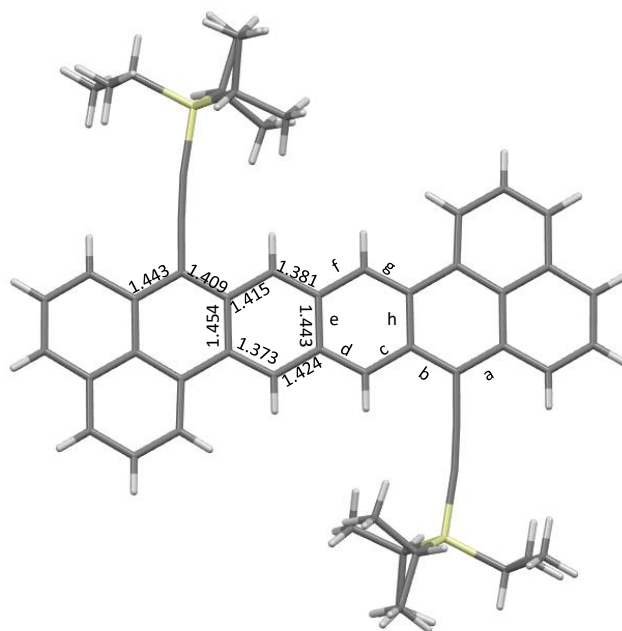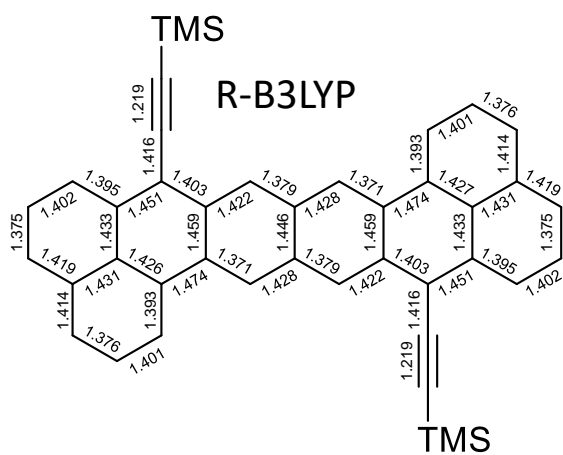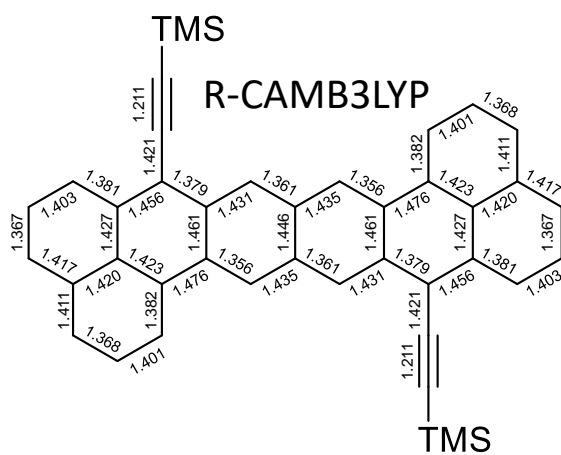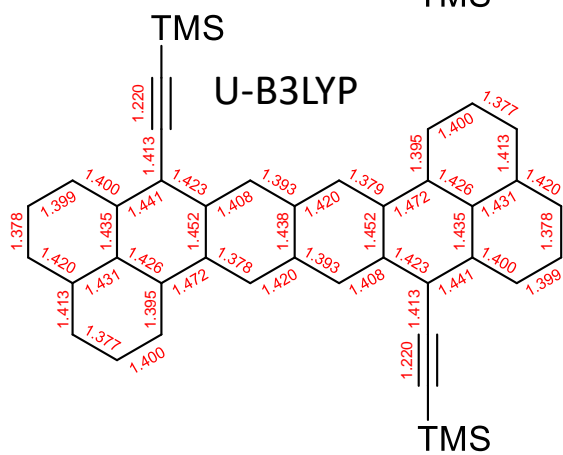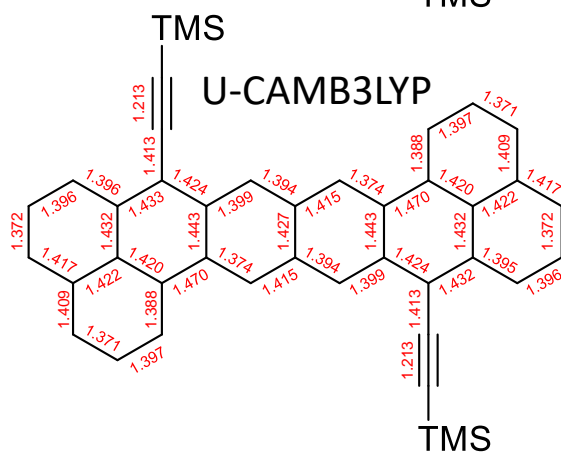



| Bond     | X-ray            | RB3LYP       | RB3LYP – XR  | UB3LYP       |
|----------|------------------|--------------|--------------|--------------|
| a        | 1.443 (2)        | 1.451        | 0.008        | 1.441        |
| <b>b</b> | <b>1.409 (2)</b> | <b>1.403</b> | <b>0.006</b> | <b>1.423</b> |
| c        | 1.415 (2)        | 1.422        | 0.007        | 1.408        |
| d        | 1.381 (2)        | 1.379        | 0.002        | 1.393        |
| e        | 1.443 (2)        | 1.446        | 0.003        | 1.438        |
| f        | 1.424 (2)        | 1.428        | 0.004        | 1.42         |
| g        | 1.373 (2)        | 1.371        | 0.002        | 1.378        |
| h        | 1.454 (2)        | 1.459        | 0.005        | 1.452        |

|RB3LYP-XR| corresponds to the bond length difference between the structure optimized at RB3LYP and the X-ray structure.

| Bond     | X-ray            | RCAM-B3LYP   | UCAM-B3LYP   | <b>RUCAM</b><br>RCAM*0.33 +UCAM*0.67 | <b>RUCAM</b> –XR |
|----------|------------------|--------------|--------------|--------------------------------------|------------------|
| a        | 1.443 (2)        | 1.456        | 1.433        | 1.440                                | 0.003            |
| <b>b</b> | <b>1.409 (2)</b> | <b>1.379</b> | <b>1.424</b> | <b>1.409</b>                         | <b>0.000</b>     |
| c        | 1.415 (2)        | 1.431        | 1.399        | 1.410                                | 0.005            |
| d        | 1.381 (2)        | 1.361        | 1.394        | 1.383                                | 0.002            |
| e        | 1.443 (2)        | 1.446        | 1.427        | 1.433                                | 0.010            |
| f        | 1.424 (2)        | 1.435        | 1.415        | 1.422                                | 0.002            |
| g        | 1.373 (2)        | 1.356        | 1.374        | 1.368                                | 0.005            |
| h        | 1.454 (2)        | 1.461        | 1.443        | 1.449                                | 0.005            |

|**RUCAM**–XR| corresponds to the bond lengths difference between the resonance hybrid between CAM structures as RCAM\*0.33 +UCAM\*0.67 and the X-ray structure.

Accordingly,  $y_0$  is in the range of  $0.67 \pm 0.05$  by taking into account the standard deviation of the apical bond length.

$y_0$  is of 0.68 calculated at PUHF from R-BL3YP structure.

# TIPS-heptazethrene: Bond length comparison of X-ray structure and calculations

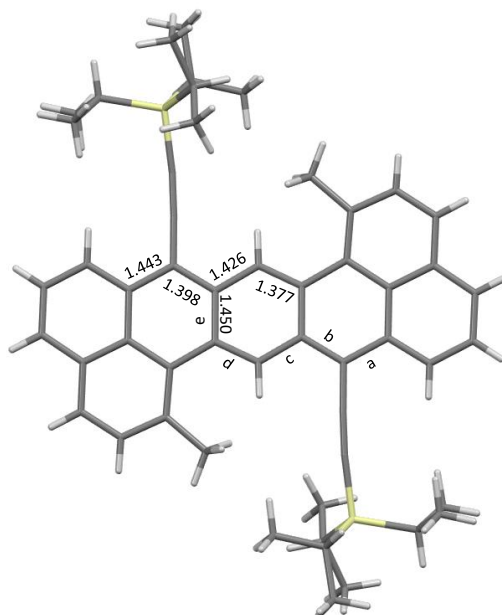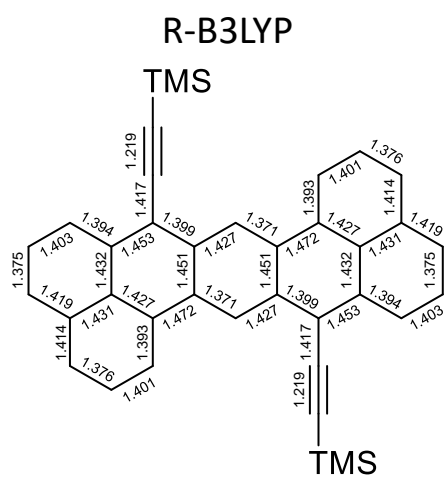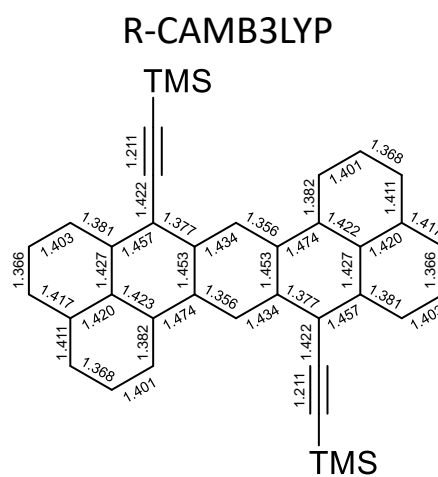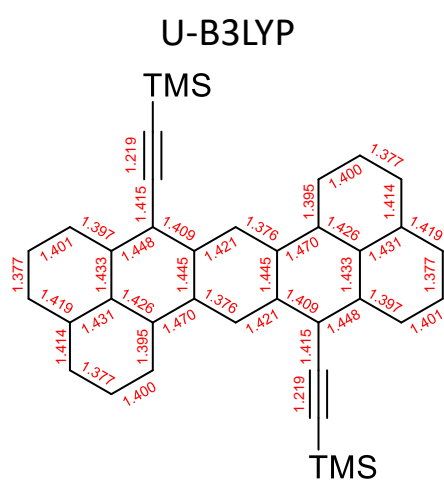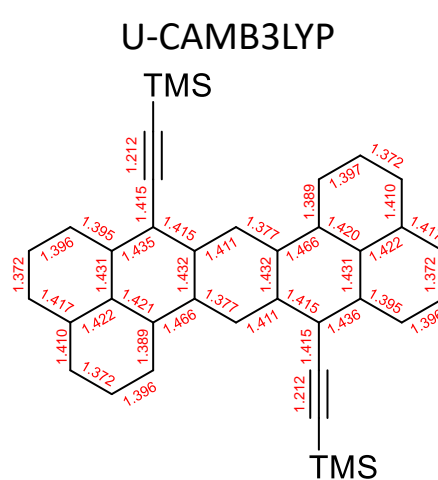

| Bond     | X-ray            | RB3LYP       | RB3LYP – XR  | UB3LYP       |
|----------|------------------|--------------|--------------|--------------|
| a        | 1.443 (2)        | 1.453        | 0.010        | 1.448        |
| <b>b</b> | <b>1.398 (2)</b> | <b>1.399</b> | <b>0.001</b> | <b>1.409</b> |
| c        | 1.426 (2)        | 1.427        | 0.001        | 1.421        |
| d        | 1.377 (2)        | 1.371        | 0.006        | 1.376        |
| e        | 1.450 (2)        | 1.451        | 0.001        | 1.445        |

|RB3LYP-XR| corresponds to the bond length difference between the structure optimized at RB3LYP and the X-ray structure.

| Bond     | X-ray            | RCAM-B3LYP   | UCAM-B3LYP   | <b>RUCAM</b><br>RCAM*0.44 +UCAM*0.56 | RUCAM–XR     |
|----------|------------------|--------------|--------------|--------------------------------------|--------------|
| a        | 1.443 (2)        | 1.457        | 1.435        | 1.445                                | 0.002        |
| <b>b</b> | <b>1.398 (2)</b> | <b>1.377</b> | <b>1.415</b> | <b>1.398</b>                         | <b>0.000</b> |
| c        | 1.426 (2)        | 1.434        | 1.411        | 1.421                                | 0.005        |
| d        | 1.377 (2)        | 1.356        | 1.377        | 1.368                                | 0.009        |
| e        | 1.450 (2)        | 1.453        | 1.432        | 1.440                                | 0.01         |

|RUCAM–XR| corresponds to the bond lengths difference between the resonance hybrid between CAM structures as RCAM\*0.44 +UCAM\*0.56 and the X-ray structure.

Accordingly,  $y_0$  is in the range of  $0.56 \pm 0.05$  by taking into account the standard deviation of the apical bond length.

$y_0$  is of 0.58 calculated at PUHF from R-BL3YP structure.

# Linear-DIAN: Bond length comparison of X-ray structure and calculations

---

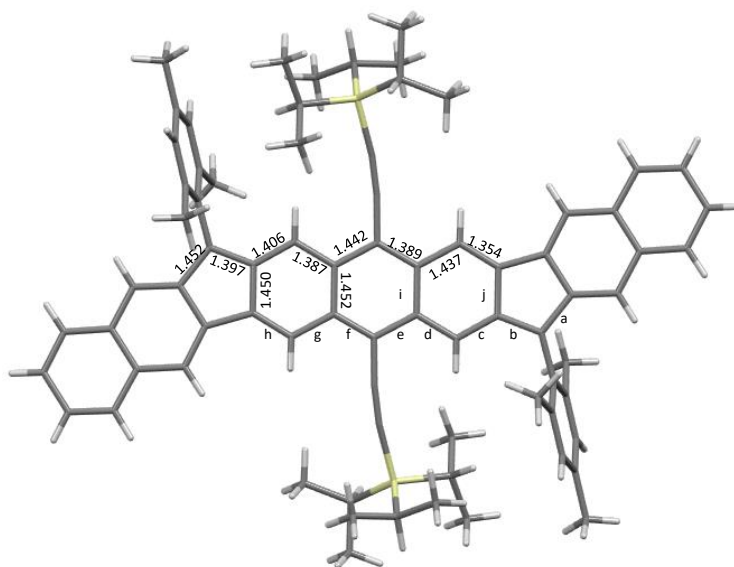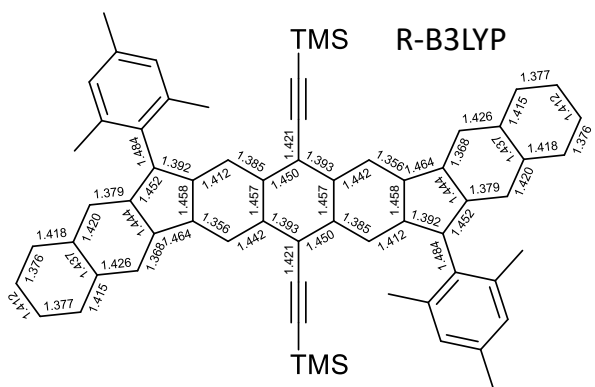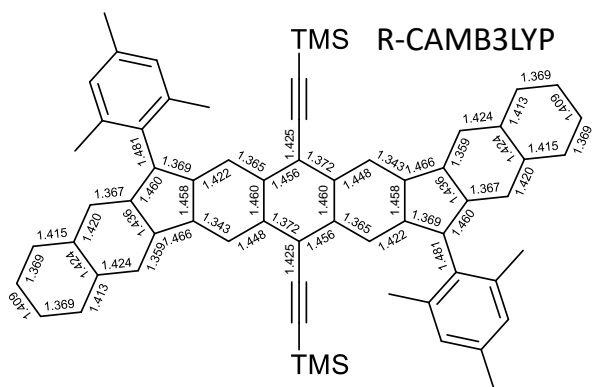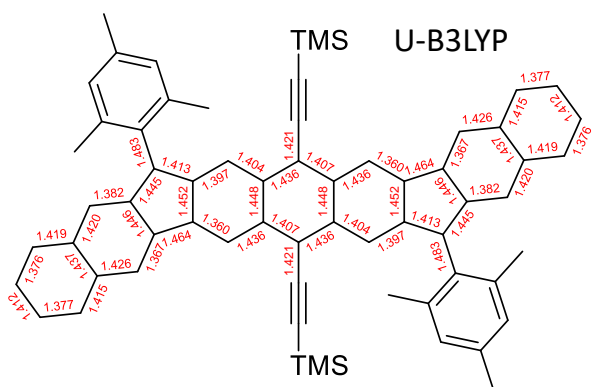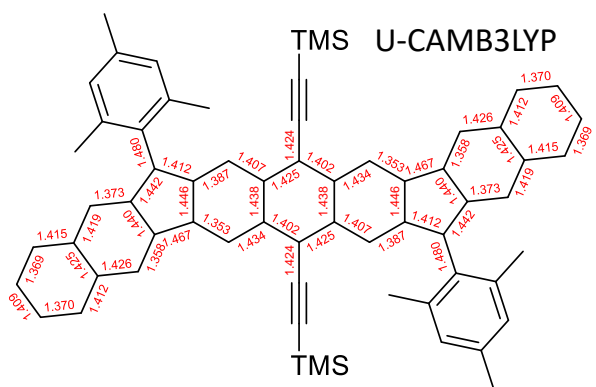

| Bond     | X-ray            | RB3LYP       | RB3LYP – XR  | UB3LYP       |
|----------|------------------|--------------|--------------|--------------|
| a        | 1.452 (2)        | 1.452        | 0.000        | 1.445        |
| <b>b</b> | <b>1.397 (2)</b> | <b>1.392</b> | <b>0.005</b> | <b>1.413</b> |
| c        | 1.406 (2)        | 1.412        | 0.006        | 1.397        |
| d        | 1.387 (2)        | 1.385        | 0.002        | 1.404        |
| e        | 1.442 (2)        | 1.450        | 0.008        | 1.436        |
| f        | 1.389 (2)        | 1.393        | 0.004        | 1.407        |
| g        | 1.437 (2)        | 1.442        | 0.005        | 1.436        |
| h        | 1.354 (2)        | 1.356        | 0.002        | 1.360        |
| i        | 1.452 (2)        | 1.457        | 0.005        | 1.448        |
| j        | 1.450 (2)        | 1.458        | 0.008        | 1.452        |

|RB3LYP-XR| corresponds to the bond length difference between the structure optimized at RB3LYP and the X-ray structure.

| Bond     | X-ray            | RCAM-B3LYP   | UCAM-B3LYP   | RUCAM                | RUCAM–XR     |
|----------|------------------|--------------|--------------|----------------------|--------------|
|          |                  |              |              | RCAM*0.35 +UCAM*0.65 |              |
| a        | 1.452 (2)        | 1.460        | 1.442        | 1.448                | 0.004        |
| <b>b</b> | <b>1.397 (2)</b> | <b>1.369</b> | <b>1.412</b> | <b>1.397</b>         | <b>0.000</b> |
| c        | 1.406 (2)        | 1.422        | 1.387        | 1.399                | 0.007        |
| d        | 1.387 (2)        | 1.365        | 1.407        | 1.392                | 0.005        |
| e        | 1.442 (2)        | 1.456        | 1.425        | 1.436                | 0.006        |
| f        | 1.389 (2)        | 1.372        | 1.402        | 1.392                | 0.004        |
| g        | 1.437 (2)        | 1.448        | 1.434        | 1.439                | 0.002        |
| h        | 1.354 (2)        | 1.343        | 1.353        | 1.350                | 0.004        |
| i        | 1.452 (2)        | 1.460        | 1.438        | 1.446                | 0.006        |
| j        | 1.450 (2))       | 1.458        | 1.446        | 1.450                | 0.000        |

|RUCAM–XR| corresponds to the bond lengths difference between the resonance hybrid between CAM structures as RCAM\*0.33 +UCAM\*0.65 and the X-ray structure.

Accordingly,  $y_0$  is in the range of  $0.65 \pm 0.05$  by taking into account the standard deviation of the apical bond length.

$y_0$  is of 0.64 calculated at PUHF from R-BL3YP structure.

**Table S1.** Energies of converged wavefunctions (hartrees) and relative energies (kcal/mol) at the B3LYP/6-311G(d,p) and the biradical character ( $y_0$ ) at the PUHF/6-31+G(d,p)

| Compound                   | Closed-shell singlet (CS) | Open-shell singlet (OS) | Triplet        | $\Delta E_{(os-cs)^a}$ | $\Delta E_{s-T}^{b)}$ | $y_0$             |
|----------------------------|---------------------------|-------------------------|----------------|------------------------|-----------------------|-------------------|
| native IF                  | -769.52124942             | -769.52124942           | -769.49034105  | 0.00                   | 19.40                 | 0.28              |
| IF                         | -1739.38280622            | -1739.38280622          | -1739.36320050 | 0.00                   | 12.30                 | 0.40              |
| native FF                  | -923.18888752             | -923.18900444           | -923.17356793  | 0.07                   | 9.69                  | 0.48              |
| native <i>linear</i> -FF   | -1230.54513905            | -1230.54529985          | -1230.53075353 | 0.10                   | 9.13                  | 0.50              |
| native <i>syn</i> -FF      | -1230.53704651            | -1230.53721199          | -1230.52296173 | 0.10                   | 8.94                  | 0.55              |
| native <i>anti</i> -FF     | -1230.54382220            | -1230.54431377          | -1230.53183541 | 0.31                   | 7.83                  | 0.57              |
| FF                         | -1893.05249659            | -1893.05398597          | -1893.04440163 | 0.93                   | 6.01                  | 0.58              |
| <i>linear</i> -FF          | -2200.40810469            | -2200.40968699          | -2200.40055400 | 0.99                   | 5.73                  | 0.59              |
| <i>syn</i> -FF             | -2200.40066681            | -2200.40204899          | -2200.39274993 | 0.87                   | 5.84                  | 0.64              |
| <i>anti</i> -FF            | -2200.40335095            | -2200.40534341          | -2200.39719645 | 1.25                   | 5.11                  | 0.67              |
| native HDIP                | -1156.72854260            | -1156.72854260          | -1156.70989822 | 0.00                   | 11.70                 | 0.46              |
| native <i>linear</i> -HDIP | -1464.08405566            | -1464.08405566          | -1464.06713677 | 0.00                   | 10.62                 | 0.48              |
| native <i>syn</i> -HDIP    | -1464.05798717            | -1464.05798734          | -1464.03842845 | 0.00                   | 12.27                 | 0.51              |
| native <i>anti</i> -HDIP   | -1464.08311923            | -1464.08311923          | -1464.06734824 | 0.00                   | 9.90                  | 0.55              |
| HDIP                       | -2126.58486864            | -2126.58531503          | -2126.57374924 | 0.28                   | 7.26                  | 0.56              |
| <i>linear</i> -HDIP        | -2433.93942087            | -2433.94014249          | -2433.92975057 | 0.45                   | 6.52                  | 0.58              |
| <i>syn</i> -HDIP           | -2433.91450704            | -2433.91452257          | -2433.90098567 | 0.01                   | 8.49                  | 0.59              |
| <i>anti</i> -HDIP          | -2433.93072698            | -2433.93136220          | -2433.92102161 | 0.40                   | 6.49                  | 0.65              |
| native DIAn                | -1076.85624712            | -1076.85881937          | -1076.84994738 | 1.61                   | 5.57                  | 0.61              |
| native <i>linear</i> -DIAn | -1384.21210192            | -1384.21484025          | -1384.20626624 | 1.72                   | 5.38                  | 0.62              |
| native <i>syn</i> -DIAn    | -1384.20526975            | -1384.20777358          | -1384.19965657 | 1.57                   | 5.09                  | 0.67              |
| native <i>anti</i> -DIAn   | -1384.21222328            | -1384.21536122          | -1384.20815568 | 1.97                   | 4.52                  | 0.69              |
| DIAn                       | -2744.88104284            | -2744.88448685          | -2744.87707957 | 2.16                   | 4.65                  | 0.62              |
| <i>linear</i> -DIAn        | -3052.23793645            | -3052.24124909          | -3052.23363228 | 2.08                   | 4.78                  | 0.64              |
| <i>syn</i> -DIAn           | -3052.22960530            | -3052.23323423          | -3052.22684354 | 2.28                   | 4.01                  | 0.68              |
| <i>anti</i> -DIAn          | -3052.23233266            | -3052.23685485          | -3052.23137688 | 2.84                   | 3.44                  | 0.71              |
| native                     | -1076.90444272            | -1076.90445862          | -1076.88826202 | 0.01                   | 10.16                 | 0.53              |
| heptazethrene              |                           |                         |                |                        |                       |                   |
| heptazethrene              | -2046.75379628            | -2046.75425773          | -2046.74198270 | 0.29                   | 7.70                  | 0.58              |
| native                     | -1230.57027544            | -1230.57212751          | -1230.56185401 | 1.16                   | 6.45                  | 0.62              |
| octazethrene               |                           |                         |                |                        |                       |                   |
| octazethrene               | -2200.41998699            | -2200.42299252          | -2200.41526878 | 1.89                   | 4.85                  | 0.67              |
| native <i>anti</i> -IIDBT  | -1872.06835017            | -1872.06930443          | -1872.05661519 | 0.60                   | 7.96                  | 0.60              |
| <i>anti</i> -IIDBT         | -2570.24747191            | -2570.24864296          | -2570.23672709 | 0.73                   | 7.48                  | 0.61              |
| <i>syn</i> -IIDBT          | -2570.24854268            | -2570.24961174          | -2570.23871638 | 0.67                   | 6.84                  | 0.66 <sup>b</sup> |

<sup>a</sup> CS singlet energy minus OS broken symmetry singlet energy. <sup>b</sup> Unrestricted triplet energy minus singlet energy. <sup>b</sup>Taken from ref. 10k

**Table S2.** Energies of converged wavefunctions (hartrees) and relative energies (kcal/mol) at the CAM-B3LYP/6-311+G(d,p) and the biradical character ( $\gamma_0$ ) at the PUHF/6-31+G(d,p)

| Compound                   | Closed-shell singlet (CS) | Open-shell singlet (OS) | Triplet        | $\Delta E_{(OS-CS)^a}$ | $\Delta E_{S-T}^b$ |
|----------------------------|---------------------------|-------------------------|----------------|------------------------|--------------------|
| native IF                  | -769.0732628              | -769.0732627            | -769.0462274   | 0                      | 16.96              |
| IF                         | -1738.658809              | -1738.660159            | -1738.645013   | 0.85                   | 9.50               |
| native FF                  | -922.6489708              | -922.6533314            | -922.6413541   | 2.74                   | 7.52               |
| native <i>linear</i> -FF   | -1229.829566              | -1229.834487            | -1229.82282    | 3.09                   | 7.32               |
| native <i>syn</i> -FF      | -1229.821737              | -1229.826584            | -1229.81644    | 3.04                   | 6.37               |
| native <i>anti</i> -FF     | -1229.827648              | -1229.83387             | -1229.825152   | 3.90                   | 5.47               |
| FF                         | -1892.23608               | -1892.245729            | -1892.238296   | 6.05                   | 4.66               |
| <i>linear</i> -FF          | -2199.416364              | -2199.42643             | -2199.419002   | 6.32                   | 4.66               |
| <i>syn</i> -FF             | -2199.408936              | -2199.418743            | -2199.412107   | 6.15                   | 4.16               |
| <i>anti</i> -FF            | -2199.410665              | -2199.422277            | -2199.416573   | 7.29                   | 3.58               |
| native HDIP                | -1156.058067              | -1156.060068            | -1156.045713   | 1.26                   | 9.01               |
| native <i>linear</i> -HDIP | -1463.237932              | -1463.240735            | -1463.227422   | 1.76                   | 8.35               |
| native <i>syn</i> -HDIP    | -1463.213241              | -1463.214228            | -1463.199956   | 0.62                   | 8.96               |
| native <i>anti</i> -HDIP   | -1463.236667              | -1463.239675            | -1463.228596   | 1.89                   | 6.95               |
| HDIP                       | -2125.638655              | -2125.645083            | -2125.636268   | 4.03                   | 5.53               |
| <i>linear</i> -HDIP        | -2432.817853              | -2432.825374            | -2432.817051   | 4.72                   | 5.22               |
| <i>syn</i> -HDIP           | -2432.794826              | -2432.798787            | -2432.789178   | 2.49                   | 6.03               |
| <i>anti</i> -HDIP          | -2432.808872              | -2432.816412            | -2432.809202   | 4.73                   | 4.52               |
| native DIAn                | -1076.22458672            | -1076.23645822          | -1076.22907545 | 7.45                   | 4.63               |
| native <i>linear</i> -DIAn | -1383.40488855            | -1383.41747022          | -1383.4099442  | 7.90                   | 4.72               |
| native <i>syn</i> -DIAn    | -1383.3977314             | -1383.41009682          | -1383.40422381 | 7.76                   | 3.69               |
| native <i>anti</i> -DIAn   | -1383.40385572            | -1383.41773781          | -1383.41261766 | 8.71                   | 3.21               |
| DIAn                       | -2743.56490649            | -2743.57857523          | -2743.57166282 | 8.58                   | 4.34               |
| <i>linear</i> -DIAn        | -3050.74633106            | -3050.7602359           | -3050.75286788 | 8.73                   | 4.62               |
| <i>syn</i> -DIAn           | -3050.73839664            | -3050.75294294          | -3050.74782001 | 9.13                   | 3.21               |
| <i>anti</i> -DIAn          | -3050.74004091            | -3050.75651663          | -3050.75227925 | 10.34                  | 2.66               |
| native heptazethrene       | -1076.28030160            | -1076.28430459          | -1076.26995009 | 2.51                   | 9.01               |
| heptazethrene              | -2045.85629974            | -2045.86299689          | -2045.85162679 | 4.20                   | 7.13               |
| native octazethrene        | -1229.85484398            | -1229.86571016          | -1229.85556919 | 6.82                   | 6.36               |
| octazethrene               | -2199.43087659            | -2199.44492911          | -2199.43706064 | 8.82                   | 4.94               |
| native <i>anti</i> -IIBDT  | -1871.43545589            | -1871.44431405          | -1871.43599431 | 5.56                   | 5.22               |
| <i>anti</i> -IIBDT         | -2569.20275724            | -2569.21238289          | -2569.20456691 | 6.04                   | 4.90               |
| <i>syn</i> -IIBDT          | -2569.20334655            | -2569.21264788          | -2569.20578774 | 5.84                   | 4.30               |

<sup>a</sup> CS singlet energy minus OS broken symmetry singlet energy. <sup>b</sup> Unrestricted triplet energy minus singlet energy

**Table S3.** Molecular orbitals at the B3LYP/6-311+G(d,p)

| Compound                                                                                                |                | HOMO                                                                                             | LUMO                                                                                               |
|---------------------------------------------------------------------------------------------------------|----------------|--------------------------------------------------------------------------------------------------|----------------------------------------------------------------------------------------------------|
| 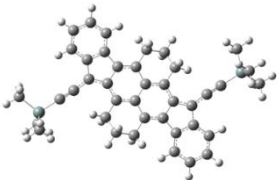<br><b>HDIP</b>        | $\alpha$ -spin |                 |                 |
|                                                                                                         | $\beta$ -spin  | <br>-4.952 eV   | <br>-3.260 eV   |
| <br><i>linear-HDIP</i> | $\alpha$ -spin |                 |                 |
|                                                                                                         | $\beta$ -spin  | <br>-4.863 eV  | <br>-3.211 eV  |
| <br><i>syn-HDIP</i>  | $\alpha$ -spin |               |               |
|                                                                                                         | $\beta$ -spin  | <br>-4.933 eV | <br>-3.348 eV |
| <br><i>anti-HDIP</i> | $\alpha$ -spin |               |               |
|                                                                                                         | $\beta$ -spin  | <br>-4.896 eV | <br>-3.349 eV |



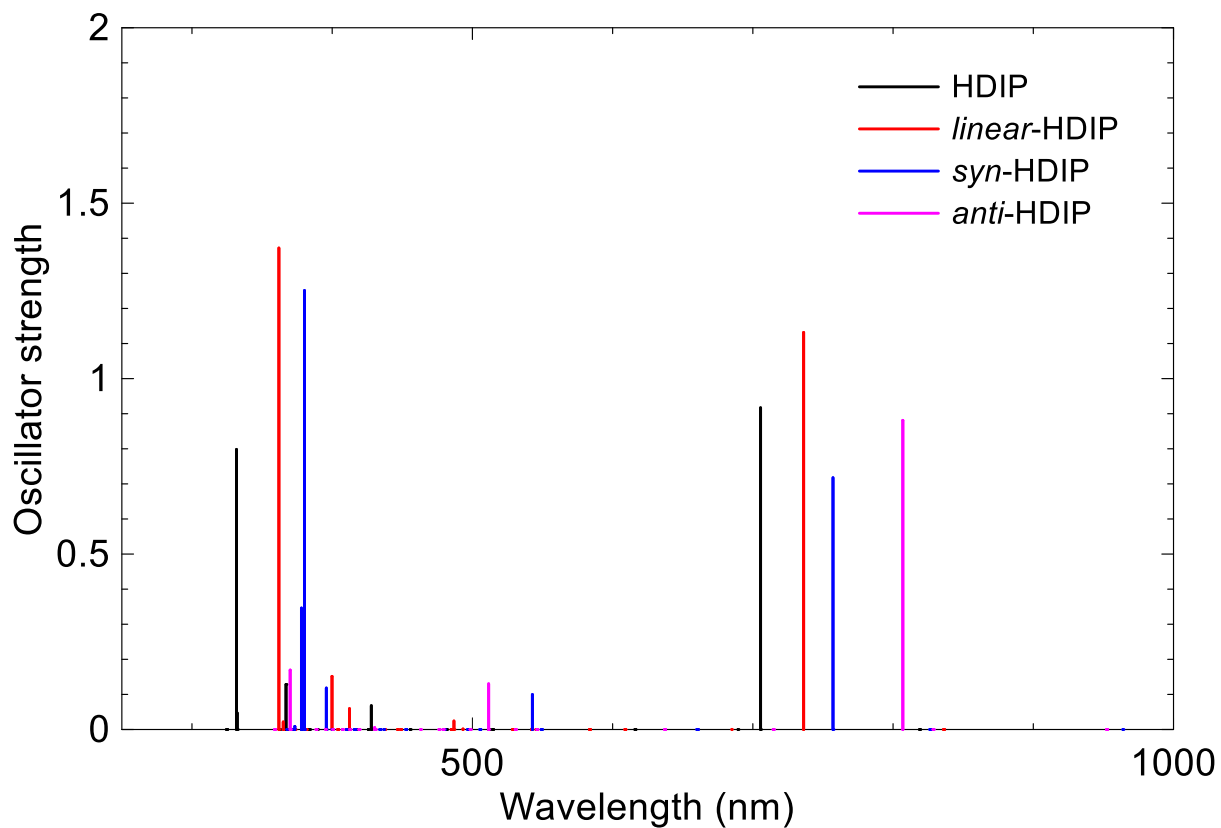

**Figure S4.** Simulated absorption spectra for HDIP derivatives at the TD-B3LYP/6-311+G(d,p)

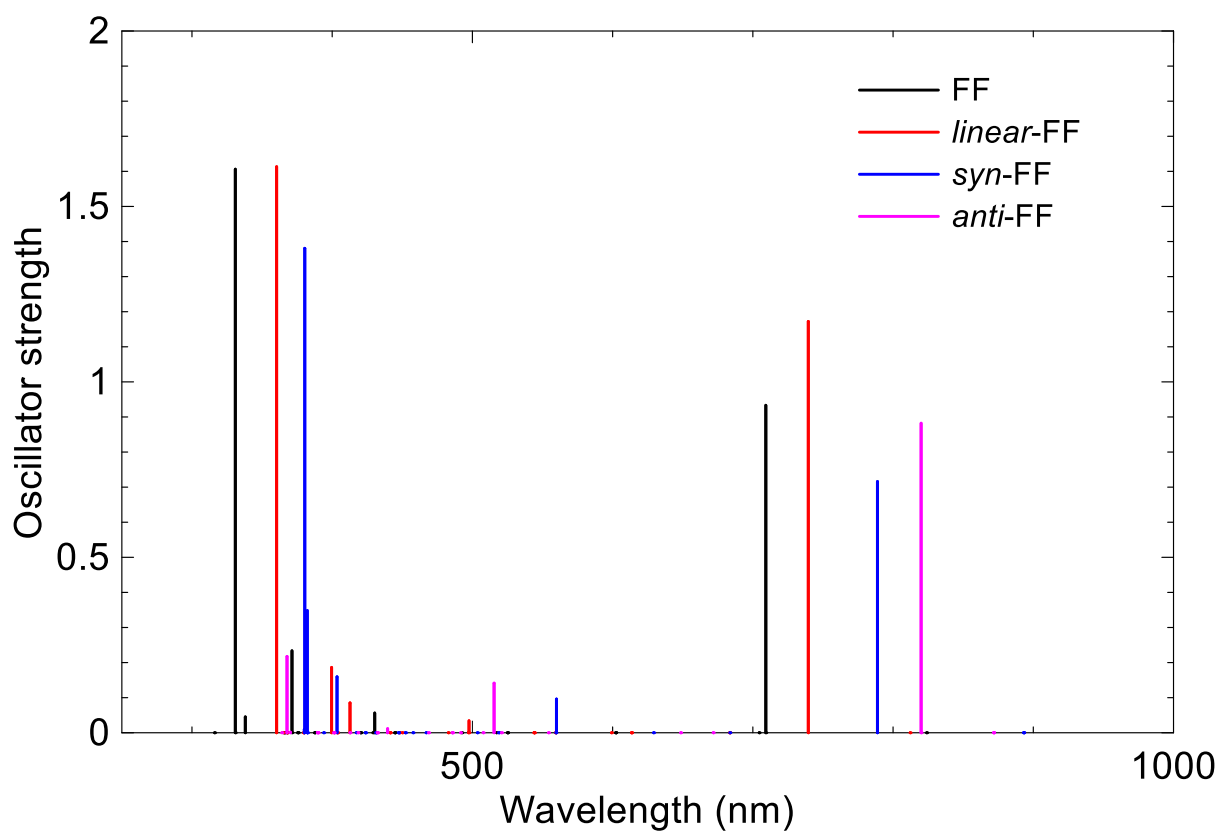

**Figure S5.** Simulated absorption spectra for FF derivatives at the TD-B3LYP/6-311+G(d,p)

**Table S4.** Calculated vertical excitation energies (VEE) for singlet excited states, wavelength, and oscillator strength ( $f$ ) at the B3LYP/6-311+G(d,p) level

| Compound        | Excited states | VEE (eV) | wavelength (nm) | $f$    | Compound           | Excited states | VEE (eV) | wavelength (nm) | $f$    |
|-----------------|----------------|----------|-----------------|--------|--------------------|----------------|----------|-----------------|--------|
| HDIP            | 1              | 1.757    | 705.49          | 0.9171 | <i>linear</i> HDIP | 1              | 1.685    | 735.88          | 1.1411 |
|                 | 2              | 1.798    | 689.45          | 0.0001 |                    | 2              | 1.815    | 683.20          | 0      |
|                 | 3              | 2.576    | 481.36          | 0      |                    | 3              | 2.343    | 529.08          | 0      |
|                 | 4              | 2.721    | 455.70          | 0      |                    | 4              | 2.514    | 493.14          | 0      |
|                 | 5              | 2.897    | 427.94          | 0.0679 |                    | 5              | 2.546    | 486.95          | 0.0244 |
|                 | 6              | 3.278    | 378.22          | 0.0263 |                    | 6              | 3.007    | 412.31          | 0.0038 |
|                 | 7              | 3.344    | 370.75          | 0.0002 |                    | 7              | 3.009    | 412.08          | 0.0565 |
|                 | 8              | 3.378    | 367.07          | 0.1284 |                    | 8              | 3.103    | 399.53          | 0.1550 |
|                 | 9              | 3.422    | 362.34          | 0.0001 |                    | 9              | 3.324    | 372.97          | 0      |
|                 | 10             | 3.731    | 332.32          | 0.0470 |                    | 10             | 3.350    | 370.13          | 0.0013 |
|                 | 11             | 3.737    | 331.75          | 0      |                    | 11             | 3.400    | 364.71          | 0.0002 |
|                 | 12             | 3.819    | 324.67          | 0      |                    | 12             | 3.427    | 361.82          | 1.4020 |
| <i>syn</i> HDIP | 1              | 1.501    | 826.25          | 0      | <i>anti</i> HDIP   | 1              | 1.496    | 828.53          | 0      |
|                 | 2              | 1.637    | 757.19          | 0.7178 |                    | 2              | 1.537    | 806.95          | 0.8811 |
|                 | 3              | 2.284    | 542.80          | 0.0994 |                    | 3              | 2.337    | 530.57          | 0      |
|                 | 4              | 2.453    | 505.36          | 0      |                    | 4              | 2.424    | 511.60          | 0.1304 |
|                 | 5              | 2.584    | 479.82          | 0      |                    | 5              | 2.488    | 498.36          | 0      |
|                 | 6              | 2.976    | 416.55          | 0      |                    | 6              | 2.881    | 430.30          | 0.0054 |
|                 | 7              | 3.132    | 395.83          | 0.1182 |                    | 7              | 3.005    | 412.60          | 0      |
|                 | 8              | 3.260    | 380.28          | 1.2512 |                    | 8              | 3.136    | 395.36          | 0.0005 |
|                 | 9              | 3.279    | 378.11          | 0.3462 |                    | 9              | 3.191    | 388.53          | 0      |
|                 | 10             | 3.321    | 373.37          | 0.0086 |                    | 10             | 3.348    | 370.30          | 0      |
|                 | 11             | 3.336    | 371.70          | 0.0002 |                    | 11             | 3.351    | 370.04          | 0.1694 |
|                 | 12             | 3.371    | 367.77          | 0.0002 |                    | 12             | 3.454    | 358.92          | 0      |
| FF              | 1              | 1.748    | 709.26          | 0.9332 | <i>linear</i> FF   | 1              | 1.677    | 739.42          | 1.1720 |
|                 | 2              | 1.760    | 704.55          | 0.0001 |                    | 2              | 1.814    | 683.41          | 0      |
|                 | 3              | 2.517    | 492.55          | 0      |                    | 3              | 2.278    | 544.21          | 0      |
|                 | 4              | 2.788    | 444.67          | 0      |                    | 4              | 2.492    | 497.59          | 0.0344 |
|                 | 5              | 2.881    | 430.34          | 0.0564 |                    | 5              | 2.494    | 497.19          | 0.0011 |
|                 | 6              | 3.300    | 375.77          | 0      |                    | 6              | 3.004    | 412.70          | 0.0850 |
|                 | 7              | 3.302    | 375.50          | 0.0003 |                    | 7              | 3.072    | 403.67          | 0.0001 |
|                 | 8              | 3.339    | 371.34          | 0.2338 |                    | 8              | 3.103    | 399.57          | 0.1865 |
|                 | 9              | 3.384    | 366.36          | 0.0001 |                    | 9              | 3.368    | 368.11          | 0      |
|                 | 10             | 3.668    | 338.02          | 0.0451 |                    | 10             | 3.371    | 367.75          | 0.0003 |
|                 | 11             | 3.747    | 330.92          | 1.6062 |                    | 11             | 3.393    | 365.38          | 0      |
|                 | 12             | 3.921    | 316.19          | 0      |                    | 12             | 3.440    | 360.40          | 1.6131 |
| <i>syn</i> FF   | 1              | 1.388    | 893.09          | 0      | <i>anti</i> FF     | 1              | 1.422    | 871.66          | 0      |
|                 | 2              | 1.572    | 788.89          | 0.7156 |                    | 2              | 1.512    | 820.01          | 0.8825 |
|                 | 3              | 2.214    | 559.96          | 0.0961 |                    | 3              | 2.380    | 520.85          | 0      |
|                 | 4              | 2.390    | 518.87          | 0      |                    | 4              | 2.405    | 515.46          | 0.1412 |
|                 | 5              | 2.655    | 467.06          | 0      |                    | 5              | 2.442    | 507.73          | 0      |
|                 | 6              | 2.876    | 431.17          | 0      |                    | 6              | 2.821    | 439.52          | 0.0115 |
|                 | 7              | 3.073    | 403.46          | 0.1594 |                    | 7              | 3.004    | 412.78          | 0      |
|                 | 8              | 3.242    | 382.42          | 0.0006 |                    | 8              | 3.180    | 389.84          | 0      |
|                 | 9              | 3.243    | 382.30          | 0.0029 |                    | 9              | 3.184    | 389.46          | 0.0003 |
|                 | 10             | 3.244    | 382.25          | 0.3482 |                    | 10             | 3.350    | 370.15          | 0.0016 |
|                 | 11             | 3.259    | 380.48          | 1.3806 |                    | 11             | 3.371    | 367.80          | 0.2174 |
|                 | 12             | 3.262    | 380.12          | 0.0098 |                    | 12             | 3.405    | 364.18          | 0.0002 |

**Table S5.** NICS(0) $\pi_{ZZ}$ , NICS(1) $\pi_{ZZ}$ , and NICS(1.7) $\pi_{ZZ}$  values at the GIAO-B3LYP/6-311+G(d,p) for native aromatic cores<sup>a</sup>

| CS singlet              |            |            | OS singlet |          |            | Triplet    |            |          |            |            |            |
|-------------------------|------------|------------|------------|----------|------------|------------|------------|----------|------------|------------|------------|
| Ring                    | NICS(0)    | NICS(1)    | NICS(1.7)  | Ring     | NICS(0)    | NICS(1)    | NICS(1.7)  | Ring     | NICS(0)    | NICS(1)    | NICS(1.7)  |
|                         | $\pi_{ZZ}$ | $\pi_{ZZ}$ | $\pi_{ZZ}$ |          | $\pi_{ZZ}$ | $\pi_{ZZ}$ | $\pi_{ZZ}$ |          | $\pi_{ZZ}$ | $\pi_{ZZ}$ | $\pi_{ZZ}$ |
| <b>native FF</b>        |            |            |            |          |            |            |            |          |            |            |            |
| <b>A</b>                | 2.35       | 1.61       | -0.12      | <b>A</b> | 1.32       | 0.69       | -0.59      | <b>A</b> | -11.13     | -11.38     | -6.09      |
| <b>B</b>                | 15.37      | 11.06      | 3.31       | <b>B</b> | 15.03      | 10.75      | 3.16       | <b>B</b> | 9.90       | 7.83       | 2.20       |
| <b>C</b>                | -23.94     | -19.55     | -10.82     | <b>C</b> | -24.10     | -19.69     | -10.90     | <b>C</b> | -19.40     | -16.73     | -9.50      |
| <b>native linear-FF</b> |            |            |            |          |            |            |            |          |            |            |            |
| <b>A</b>                | -1.42      | -1.78      | -1.72      | <b>A</b> | -2.45      | -2.68      | -2.19      | <b>A</b> | -13.25     | -13.11     | -6.99      |
| <b>B</b>                | 12.49      | 8.15       | 2.02       | <b>B</b> | 12.26      | 7.94       | 1.92       | <b>B</b> | 9.02       | 6.51       | 1.65       |
| <b>C</b>                | -22.95     | -20.34     | -11.66     | <b>C</b> | -23.02     | -20.40     | -11.70     | <b>C</b> | -16.29     | -15.73     | -9.26      |
| <b>D</b>                | -32.06     | -27.23     | -15.66     | <b>D</b> | -32.14     | -27.30     | -15.69     | <b>D</b> | -29.74     | -25.23     | -14.42     |
| <b>native syn-FF</b>    |            |            |            |          |            |            |            |          |            |            |            |
| <b>A</b>                | 7.80       | 6.28       | 2.37       | <b>A</b> | 6.04       | 4.72       | 1.57       | <b>A</b> | -14.80     | -13.71     | -7.80      |
| <b>B</b>                | 25.66      | 19.79      | 7.23       | <b>B</b> | 24.66      | 18.91      | 6.81       | <b>B</b> | 14.68      | 11.36      | 3.53       |
| <b>C</b>                | -21.05     | -18.58     | -10.51     | <b>C</b> | -21.27     | -18.77     | -10.64     | <b>C</b> | -12.49     | -12.55     | -7.41      |
| <b>D</b>                | -30.70     | -25.89     | -14.93     | <b>D</b> | -30.83     | -26.00     | -14.99     | <b>D</b> | -26.91     | -23.29     | -13.24     |
| <b>native anti-FF</b>   |            |            |            |          |            |            |            |          |            |            |            |
| <b>A</b>                | 7.02       | 6.01       | 2.22       | <b>A</b> | 3.84       | 3.20       | 0.78       | <b>A</b> | -8.64      | -10.34     | -5.75      |
| <b>B</b>                | 22.02      | 17.20      | 6.08       | <b>B</b> | 20.43      | 15.80      | 5.42       | <b>B</b> | 11.15      | 7.95       | 2.17       |
| <b>C</b>                | -21.28     | -18.50     | -10.52     | <b>C</b> | -21.54     | -18.73     | -10.68     | <b>C</b> | -13.70     | -13.70     | -8.25      |
| <b>D</b>                | -32.79     | -27.56     | -15.86     | <b>D</b> | -32.90     | -27.66     | -15.91     | <b>D</b> | -31.42     | -25.93     | -14.83     |
| <b>FF</b>               |            |            |            |          |            |            |            |          |            |            |            |
| <b>A</b>                | -0.61      | -0.73      | -1.45      | <b>A</b> | -5.19      | -4.76      | -3.50      | <b>A</b> | -13.20     | -12.99     | -7.04      |
| <b>B</b>                | 14.61      | 10.52      | 3.00       | <b>B</b> | 13.28      | 9.32       | 2.38       | <b>B</b> | 9.24       | 7.24       | 1.77       |
| <b>C</b>                | -24.67     | -20.00     | -11.09     | <b>C</b> | -25.43     | -20.65     | -11.46     | <b>C</b> | -22.56     | -19.27     | -10.84     |
| <b>linear-FF</b>        |            |            |            |          |            |            |            |          |            |            |            |
| <b>A</b>                | -4.01      | -3.74      | -2.89      | <b>A</b> | -7.85      | -7.11      | -4.61      | <b>A</b> | -14.76     | -14.24     | -7.67      |
| <b>B</b>                | 12.24      | 8.11       | 1.89       | <b>B</b> | 11.50      | 7.41       | 1.52       | <b>B</b> | 9.39       | 6.81       | 1.64       |
| <b>C</b>                | -23.54     | -20.68     | -11.89     | <b>C</b> | -23.98     | -21.06     | -12.11     | <b>C</b> | -19.54     | -18.34     | -10.65     |
| <b>D</b>                | -31.97     | -27.12     | -15.64     | <b>D</b> | -32.33     | -27.43     | -15.81     | <b>D</b> | -30.98     | -26.27     | -15.08     |
| <b>syn-FF</b>           |            |            |            |          |            |            |            |          |            |            |            |
| <b>A</b>                | 4.36       | 3.54       | 0.84       | <b>A</b> | -1.49      | -1.65      | -1.81      | <b>A</b> | -17.35     | -15.67     | -8.95      |
| <b>B</b>                | 23.92      | 18.39      | 6.51       | <b>B</b> | 20.92      | 15.75      | 5.23       | <b>B</b> | 13.45      | 10.27      | 2.84       |
| <b>C</b>                | -21.62     | -18.93     | -10.79     | <b>C</b> | -22.51     | -19.71     | -11.29     | <b>C</b> | -16.66     | -15.82     | -9.22      |
| <b>D</b>                | -31.32     | -26.41     | -15.24     | <b>D</b> | -31.83     | -26.85     | -15.49     | <b>D</b> | -28.75     | -24.91     | -14.20     |
| <b>anti-FF</b>          |            |            |            |          |            |            |            |          |            |            |            |
| <b>A</b>                | 3.66       | 3.40       | 0.75       | <b>A</b> | -3.44      | -2.89      | -2.45      | <b>A</b> | -11.01     | -11.43     | -6.16      |
| <b>B</b>                | 21.86      | 16.98      | 5.90       | <b>B</b> | 18.56      | 14.05      | 4.50       | <b>B</b> | 13.56      | 10.24      | 3.13       |
| <b>C</b>                | -20.65     | -17.94     | -10.27     | <b>C</b> | -21.56     | -18.74     | -10.77     | <b>C</b> | -17.48     | -16.56     | -9.72      |
| <b>D</b>                | -32.63     | -27.46     | -15.73     | <b>D</b> | -32.99     | -27.78     | -15.90     | <b>D</b> | -32.25     | -26.93     | -15.37     |

<sup>a</sup> Ring positions are shown in the following drawings

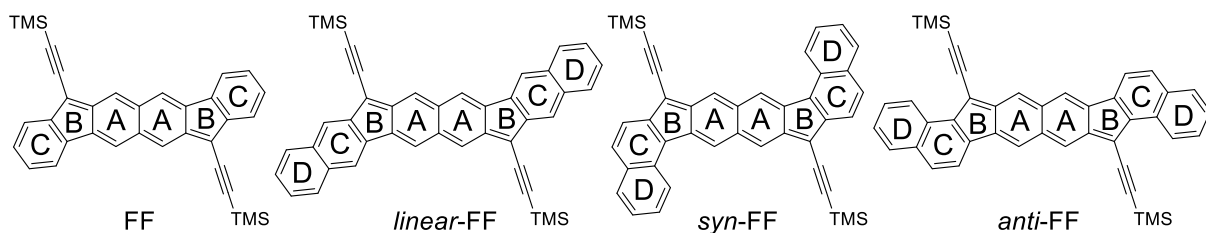

**Table S6.** NICS(0) $\pi_{ZZ}$ , NICS(1) $\pi_{ZZ}$ , and NICS(1.7) $\pi_{ZZ}$  values at the GIAO-CAM-B3LYP/6-311+G(d,p) for aromatic cores<sup>a</sup>

| CS singlet              |                       |                       | OS singlet              |          |                       | Triplet               |                         |          |                       |                       |                         |
|-------------------------|-----------------------|-----------------------|-------------------------|----------|-----------------------|-----------------------|-------------------------|----------|-----------------------|-----------------------|-------------------------|
| Ring                    | NICS(0)<br>$\pi_{ZZ}$ | NICS(1)<br>$\pi_{ZZ}$ | NICS(1.7)<br>$\pi_{ZZ}$ | Ring     | NICS(0)<br>$\pi_{ZZ}$ | NICS(1)<br>$\pi_{ZZ}$ | NICS(1.7)<br>$\pi_{ZZ}$ | Ring     | NICS(0)<br>$\pi_{ZZ}$ | NICS(1)<br>$\pi_{ZZ}$ | NICS(1.7)<br>$\pi_{ZZ}$ |
| <b>native FF</b>        |                       |                       |                         |          |                       |                       |                         |          |                       |                       |                         |
| <b>A</b>                | 1.69                  | 0.90                  | -0.48                   | <b>A</b> | -9.81                 | -8.98                 | -5.66                   | <b>A</b> | -14.97                | -14.48                | -7.75                   |
| <b>B</b>                | 11.97                 | 8.14                  | 1.82                    | <b>B</b> | 11.72                 | 7.87                  | 1.59                    | <b>B</b> | 9.60                  | 7.92                  | 2.08                    |
| <b>C</b>                | -29.55                | -24.25                | -13.35                  | <b>C</b> | -27.85                | -22.86                | -12.64                  | <b>C</b> | -23.10                | -19.44                | -10.91                  |
| <b>native linear-FF</b> |                       |                       |                         |          |                       |                       |                         |          |                       |                       |                         |
| <b>A</b>                | -0.57                 | -1.21                 | -1.31                   | <b>A</b> | -11.82                | -10.78                | -6.42                   | <b>A</b> | -16.55                | -15.80                | -8.43                   |
| <b>B</b>                | 10.84                 | 6.75                  | 1.37                    | <b>B</b> | 10.81                 | 6.65                  | 1.18                    | <b>B</b> | 8.30                  | 6.37                  | 1.47                    |
| <b>C</b>                | -27.26                | -23.93                | -13.63                  | <b>C</b> | -24.75                | -21.85                | -12.54                  | <b>C</b> | -19.74                | -18.15                | -10.61                  |
| <b>D</b>                | -34.69                | -29.46                | -16.92                  | <b>D</b> | -33.93                | -28.80                | -16.49                  | <b>D</b> | -31.84                | -27.03                | -15.44                  |
| <b>native syn-FF</b>    |                       |                       |                         |          |                       |                       |                         |          |                       |                       |                         |
| <b>A</b>                | 5.18                  | 3.93                  | 1.07                    | <b>A</b> | -8.55                 | -8.01                 | -5.15                   | <b>A</b> | -19.83                | -17.93                | -10.32                  |
| <b>B</b>                | 19.69                 | 14.72                 | 4.68                    | <b>B</b> | 17.41                 | 12.74                 | 3.72                    | <b>B</b> | 13.41                 | 11.36                 | 3.63                    |
| <b>C</b>                | -27.15                | -23.66                | -13.34                  | <b>C</b> | -24.15                | -21.23                | -12.12                  | <b>C</b> | -13.53                | -13.68                | -7.95                   |
| <b>D</b>                | -33.47                | -28.27                | -16.29                  | <b>D</b> | -32.91                | -27.80                | -15.97                  | <b>D</b> | -31.70                | -26.78                | -15.33                  |
| <b>native anti-FF</b>   |                       |                       |                         |          |                       |                       |                         |          |                       |                       |                         |
| <b>A</b>                | 5.14                  | 4.27                  | 1.24                    | <b>A</b> | -10.66                | -9.41                 | -5.88                   | <b>A</b> | -13.53                | -13.20                | -6.96                   |
| <b>B</b>                | 16.72                 | 12.65                 | 3.78                    | <b>B</b> | 14.64                 | 10.80                 | 2.90                    | <b>B</b> | 11.47                 | 9.87                  | 3.10                    |
| <b>C</b>                | -27.61                | -23.81                | -13.47                  | <b>C</b> | -23.32                | -20.30                | -11.65                  | <b>C</b> | -17.57                | -16.04                | -9.48                   |
| <b>D</b>                | -34.93                | -29.45                | -16.98                  | <b>D</b> | -34.32                | -28.84                | -16.51                  | <b>D</b> | -33.45                | -28.02                | -15.97                  |
| <b>FF</b>               |                       |                       |                         |          |                       |                       |                         |          |                       |                       |                         |
| <b>A</b>                | -0.11                 | -0.41                 | -1.29                   | <b>A</b> | -16.02                | -14.12                | -8.42                   | <b>A</b> | -16.74                | -15.86                | -8.55                   |
| <b>B</b>                | 11.78                 | 8.12                  | 1.76                    | <b>B</b> | 11.08                 | 7.38                  | 1.24                    | <b>B</b> | 8.85                  | 7.17                  | 1.59                    |
| <b>C</b>                | -29.72                | -24.27                | -13.40                  | <b>C</b> | -28.57                | -23.33                | -12.90                  | <b>C</b> | -26.28                | -21.93                | -12.22                  |
| <b>linear-FF</b>        |                       |                       |                         |          |                       |                       |                         |          |                       |                       |                         |
| <b>A</b>                | -2.42                 | -2.55                 | -2.18                   | <b>A</b> | -17.17                | -15.12                | -8.82                   | <b>A</b> | -17.72                | -16.65                | -8.92                   |
| <b>B</b>                | 10.75                 | 6.84                  | 1.31                    | <b>B</b> | 10.63                 | 6.60                  | 1.00                    | <b>B</b> | 8.32                  | 6.32                  | 1.29                    |
| <b>C</b>                | -27.51                | -24.01                | -13.72                  | <b>C</b> | -25.64                | -22.45                | -12.88                  | <b>C</b> | -23.21                | -20.90                | -12.09                  |
| <b>D</b>                | -34.56                | -29.32                | -16.88                  | <b>D</b> | -34.03                | -28.85                | -16.56                  | <b>D</b> | -33.03                | -28.02                | -16.08                  |
| <b>syn-FF</b>           |                       |                       |                         |          |                       |                       |                         |          |                       |                       |                         |
| <b>A</b>                | 3.46                  | 2.72                  | 0.33                    | <b>A</b> | -14.56                | -13.00                | -7.79                   | <b>A</b> | -18.63                | -17.07                | -9.41                   |
| <b>B</b>                | 19.45                 | 14.64                 | 4.60                    | <b>B</b> | 15.61                 | 11.22                 | 2.91                    | <b>B</b> | 13.53                 | 10.33                 | 2.73                    |
| <b>C</b>                | -27.14                | -23.54                | -13.33                  | <b>C</b> | -25.18                | -21.98                | -12.60                  | <b>C</b> | -17.70                | -16.96                | -9.74                   |
| <b>D</b>                | -33.74                | -28.51                | -16.43                  | <b>D</b> | -33.60                | -28.41                | -16.32                  | <b>D</b> | -26.53                | -23.72                | -13.22                  |
| <b>anti-FF</b>          |                       |                       |                         |          |                       |                       |                         |          |                       |                       |                         |
| <b>A</b>                | 3.61                  | 3.26                  | 0.56                    | <b>A</b> | -16.11                | -13.89                | -8.24                   | <b>A</b> | -15.24                | -14.45                | -7.66                   |
| <b>B</b>                | 17.96                 | 13.68                 | 4.18                    | <b>B</b> | 14.26                 | 10.30                 | 2.55                    | <b>B</b> | 11.54                 | 9.55                  | 2.73                    |
| <b>C</b>                | -26.70                | -23.01                | -13.05                  | <b>C</b> | -23.72                | -20.61                | -11.85                  | <b>C</b> | -21.07                | -18.92                | -11.05                  |
| <b>D</b>                | -34.92                | -29.46                | -16.88                  | <b>D</b> | -34.51                | -29.07                | -16.58                  | <b>D</b> | -34.11                | -28.69                | -16.35                  |

<sup>a</sup> Ring positions are shown in the following drawings



## ODD-ELECTRON DENSITY MAPS FOR FF DERIVATIVES

---

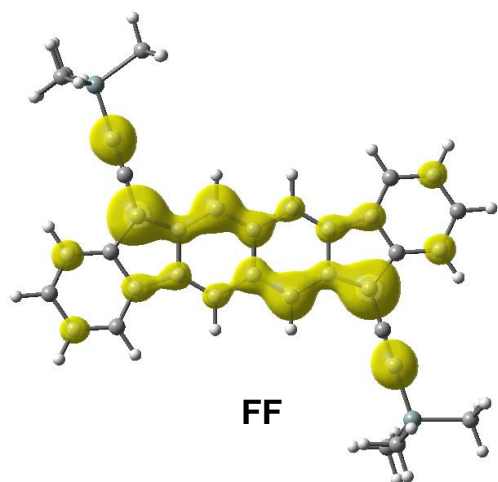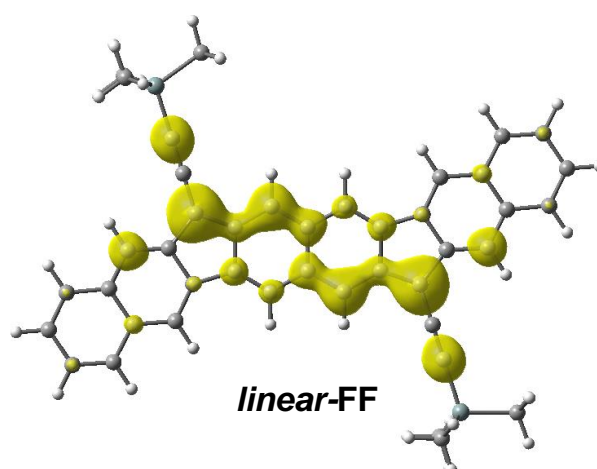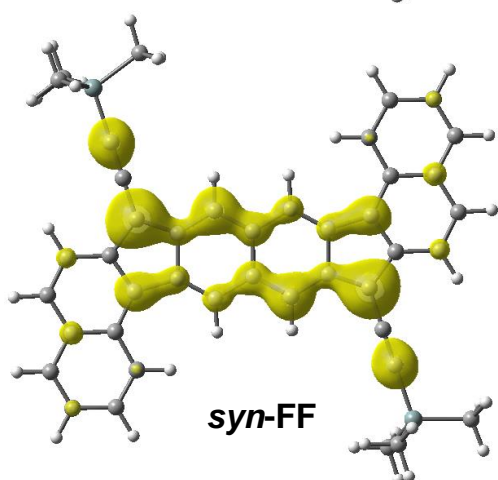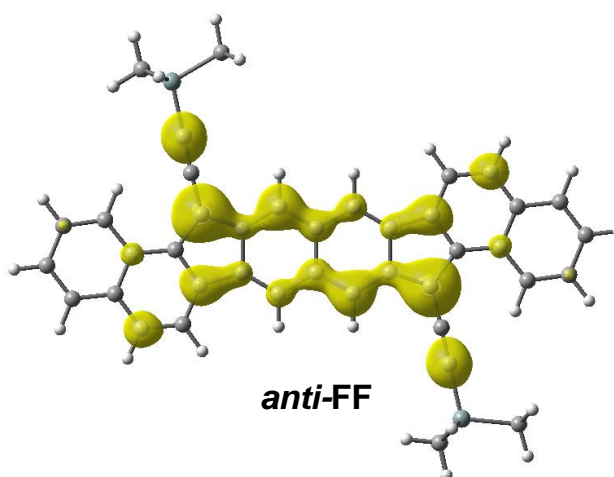

## OFET DEVICES

Bottom-gate/top-contact (BG/TC) OFETs were constructed on heavily doped n-type silicon wafers covered with thermally grown silicon dioxide (300 nm) which was cleaned by piranha solution. The silicon dioxide acts as a gate dielectric layer, and the silicon wafer serves as a gate electrode. The cross-linked PVP (poly-4-vinylphenol) was prepared by spin-coating from a solution of PVP (Aldrich 436224, Mw ~25,000, 1.0 wt%) and poly(melamine-co-formaldehyde) (Mn ~432, 1.0 wt%) in propylene glycol monomethyl ether acetate (PGMEA) at the rotational speed of 500 rpm for 5 s and then 4000 rpm for 60 s, followed by the cross-linkage at temperatures of 150 °C for 60 min under nitrogen atmosphere. Organic semiconductor layers were formed by drop-casting (see Figure S5) from a 0.1~0.2 wt% solution of HDIP derivatives with 1/4 wt% polystyrene (PS) in *o*-dichlorobenzene at 60 °C, followed by thermal annealing at 60 °C for ca. 30 min. Top-contact gold source-drain electrodes (50 nm) were deposited on PVP through a shadow mask with  $L = 50, 100, 150$  and  $200 \mu\text{m}$ , and  $W = 2000 \mu\text{m}$ .

Bottom-contact/top-gate (BC/TG) OFETs were constructed on Corning's EAGLE glass substrates with the cross-linked PVP, which was prepared by spin-coating from a solution of PVP (10.0 wt%) and poly(melamine-co-formaldehyde) (10.0 wt%) in PGMEA at the rotational speed of 500 rpm for 5 s and then 4000 rpm for 60 s, followed by the cross-linkage at temperatures of 150 °C for 60 min under nitrogen atmosphere. Bottom-contact gold source-drain electrodes (50 nm) were deposited on PVP through a shadow mask with  $L = 50, 100, 150$  and  $200 \mu\text{m}$ , and  $W = 2000 \mu\text{m}$ . Organic semiconductor layers were formed by drop-casting from a 0.05–0.1 wt% solution of HDIP derivatives with 1/4 wt% PS in *o*-dichlorobenzene at 60 °C, followed by thermal annealing at 60 °C for ca. 30 min. The CYTOP dielectric layer (450 nm measured by DektakXT™ Stylus Profiler) was spin-coated from a solution of CYTOP™ CTL-809M in CT-solv 180 from Asahi Glass at the rotational speed of 500 rpm for 5 s and then 1800 rpm for 120 s on top of the organic layer and then was dried at room temperature for 2 h. The Al gate electrode (50 nm) was formed by vacuum evaporation through a shadow mask.

The FET measurements were carried out at room temperature in a glovebox without exposure to air with a semiconductor parameter analyzer (B1500, Agilent). Mobilities ( $\mu$ ) were calculated in the saturation regime by the relationship:  $\mu_{\text{sat}} = (2I_{\text{D}}L)/[WC_i(V_{\text{G}} - V_{\text{th}})^2]$  where  $I_{\text{D}}$  is the source-drain saturation current;  $C_i$  is the capacitance of the insulating layer;  $V_{\text{G}}$  is the gate voltage and  $V_{\text{th}}$  is the threshold voltage. The latter can be estimated as the intercept of the linear section of the plot of  $V_{\text{G}}$  ( $I_{\text{D}})^{1/2}$ . The reproducibility of the device performance of the presented devices was confirmed by measuring different samples fabricated on different days.

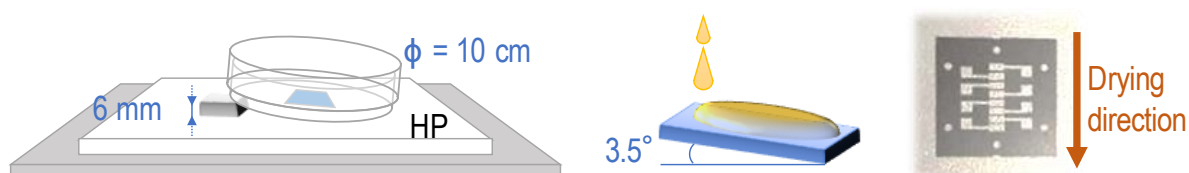

**Figure S6.** Schematic image of the drop-casting procedure. The substrates were placed inside the petri-dish with the saturated solvent vapor at 60 °C, then 30  $\mu\text{L}$  of the semiconductor solution was drop-casted.

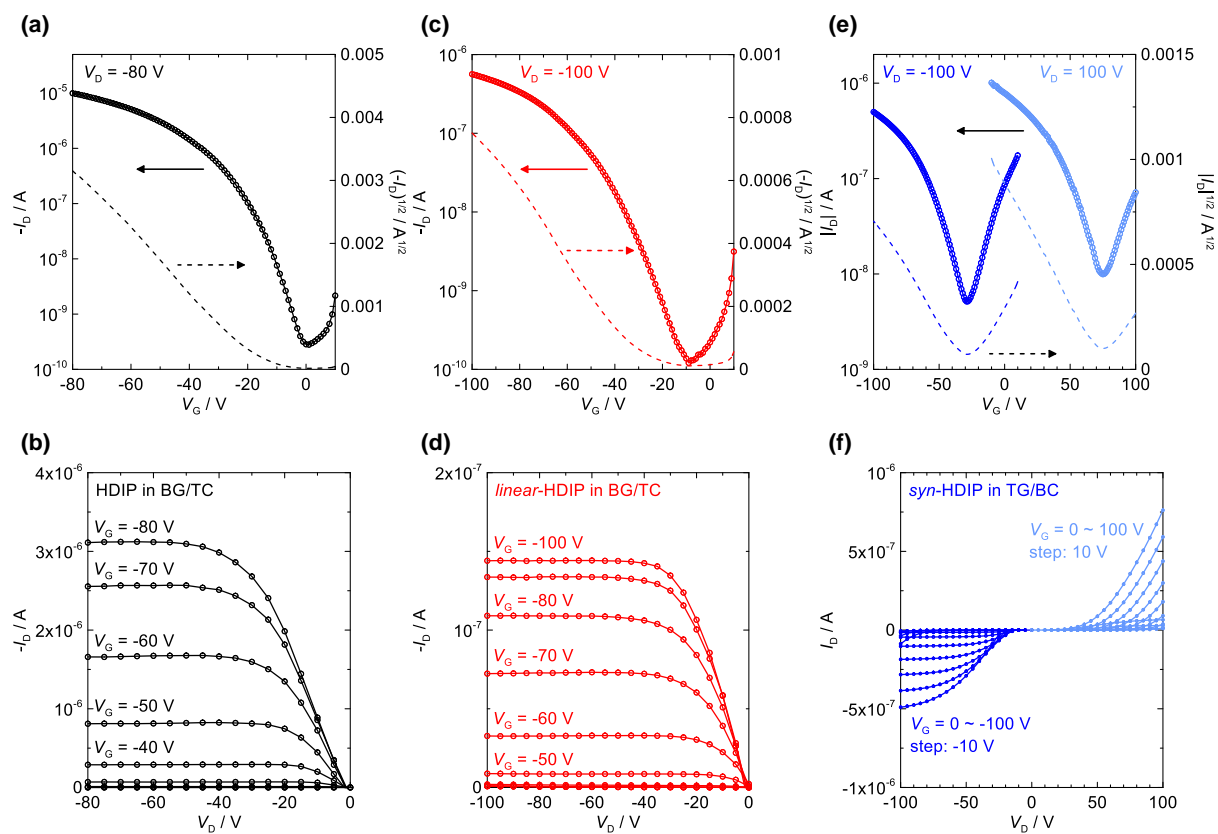

**Figure S7.** OFET devices of HDIP derivatives. (a) Transfer and (b) output characteristics of the BG/TC device with a drop-casted HDIP layer. (c) Transfer and (d) output characteristics of the BG/TC device with a drop-casted *linear*-HDIP layer. (e) Transfer and (f) output characteristics of the TG/BC device with a drop-casted *syn*-HDIP layer.

# RMN SPECTRA

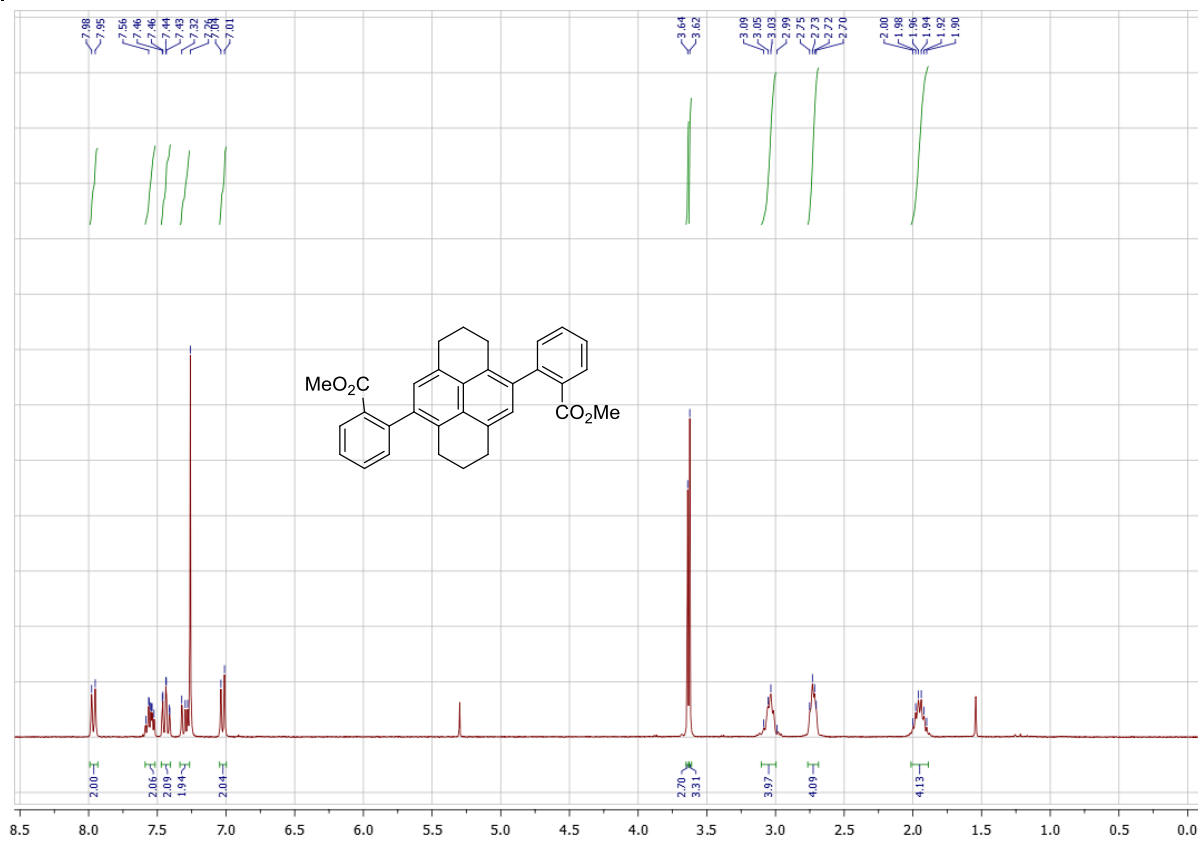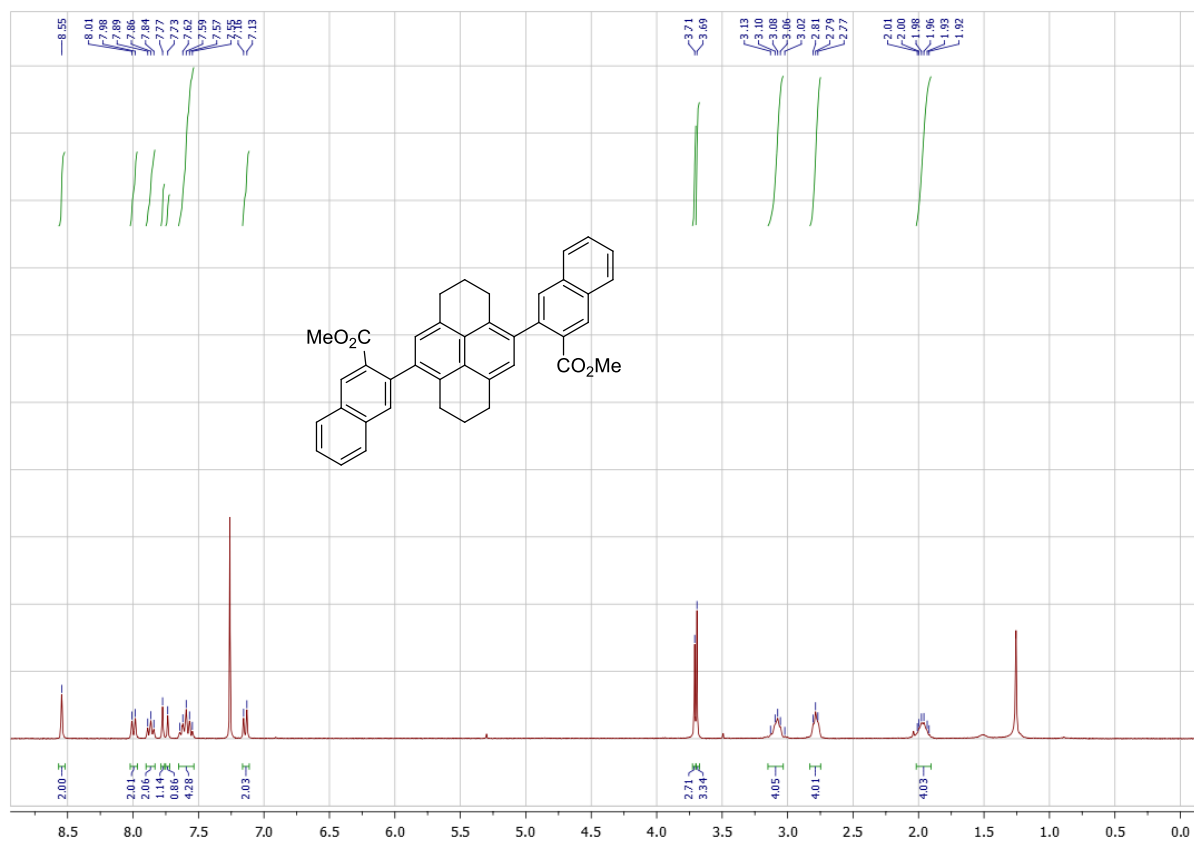



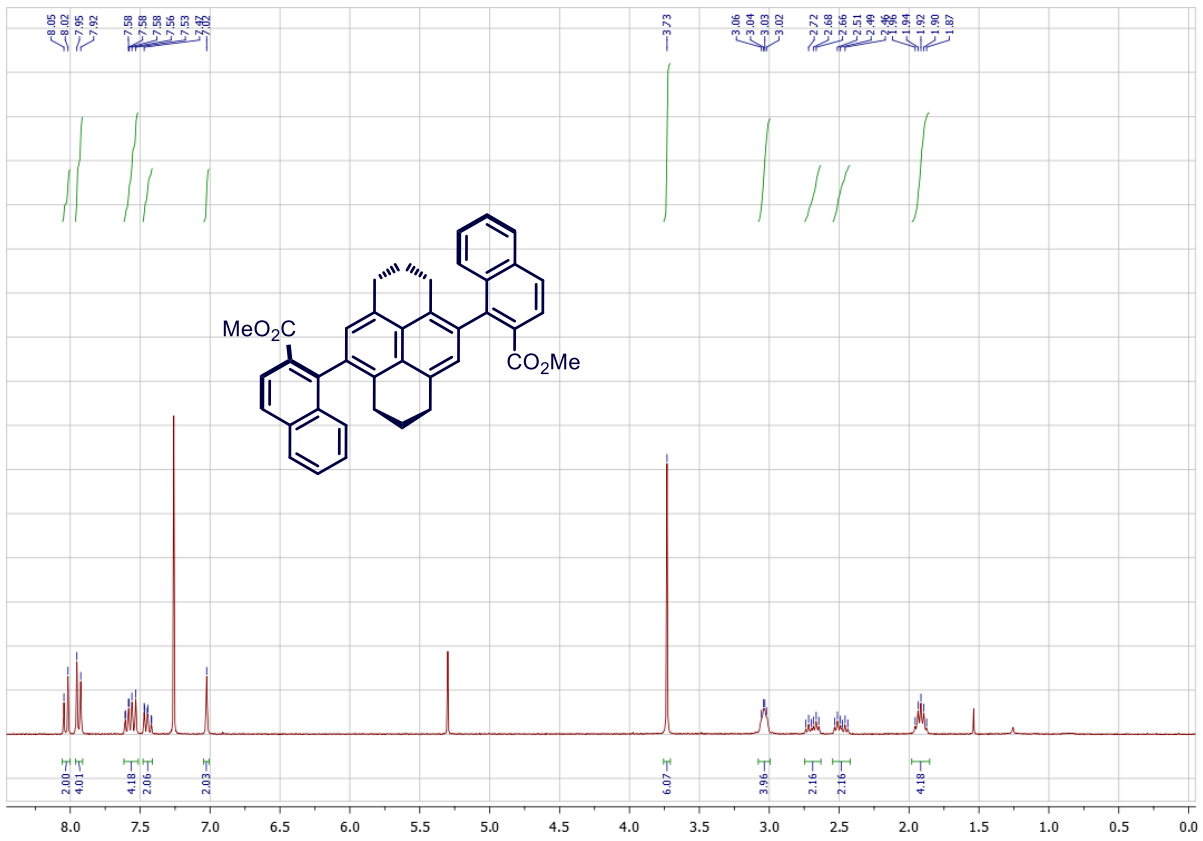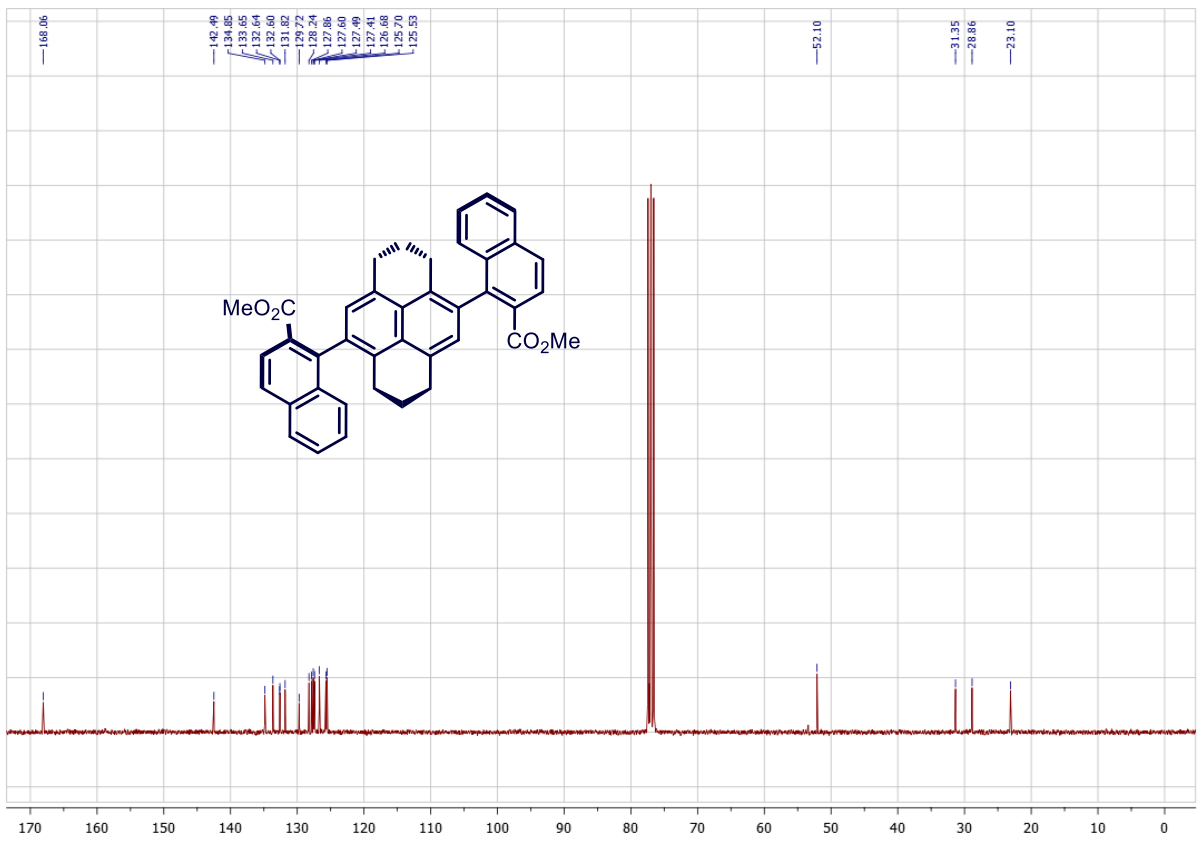

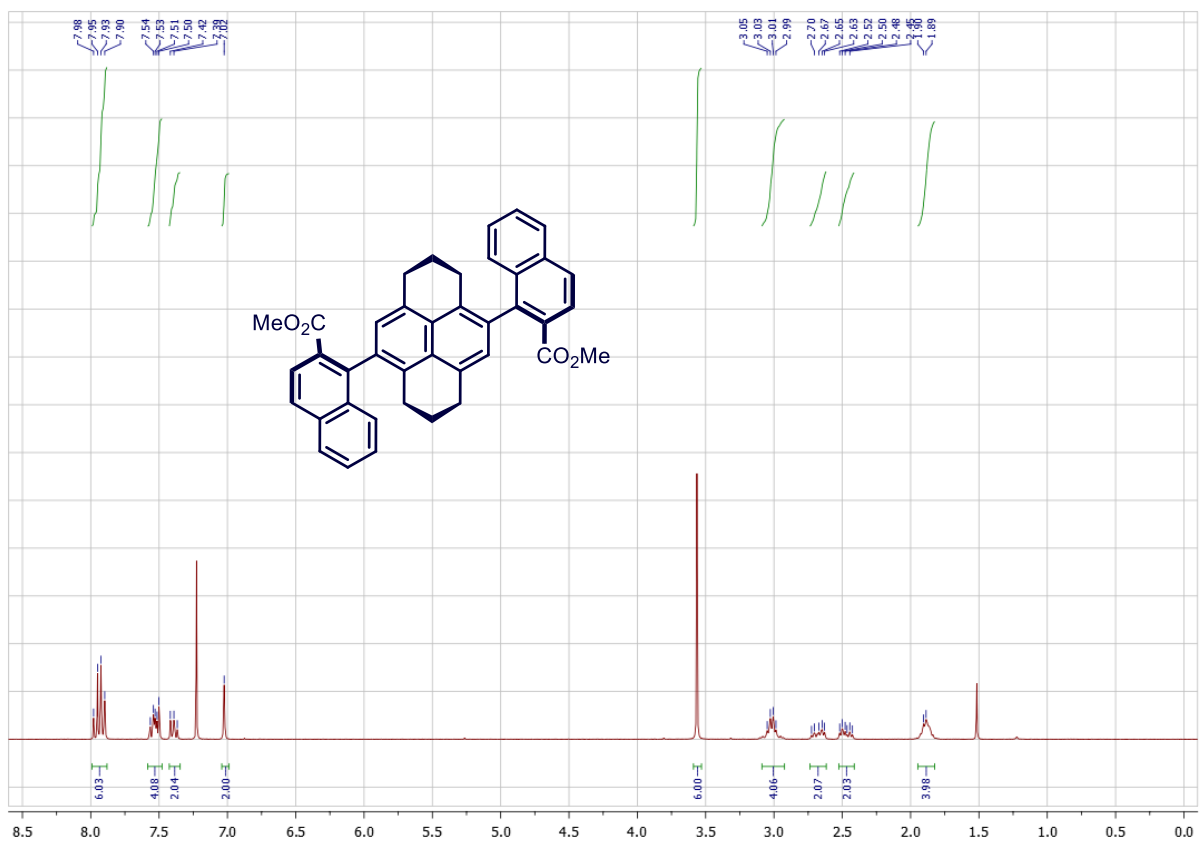

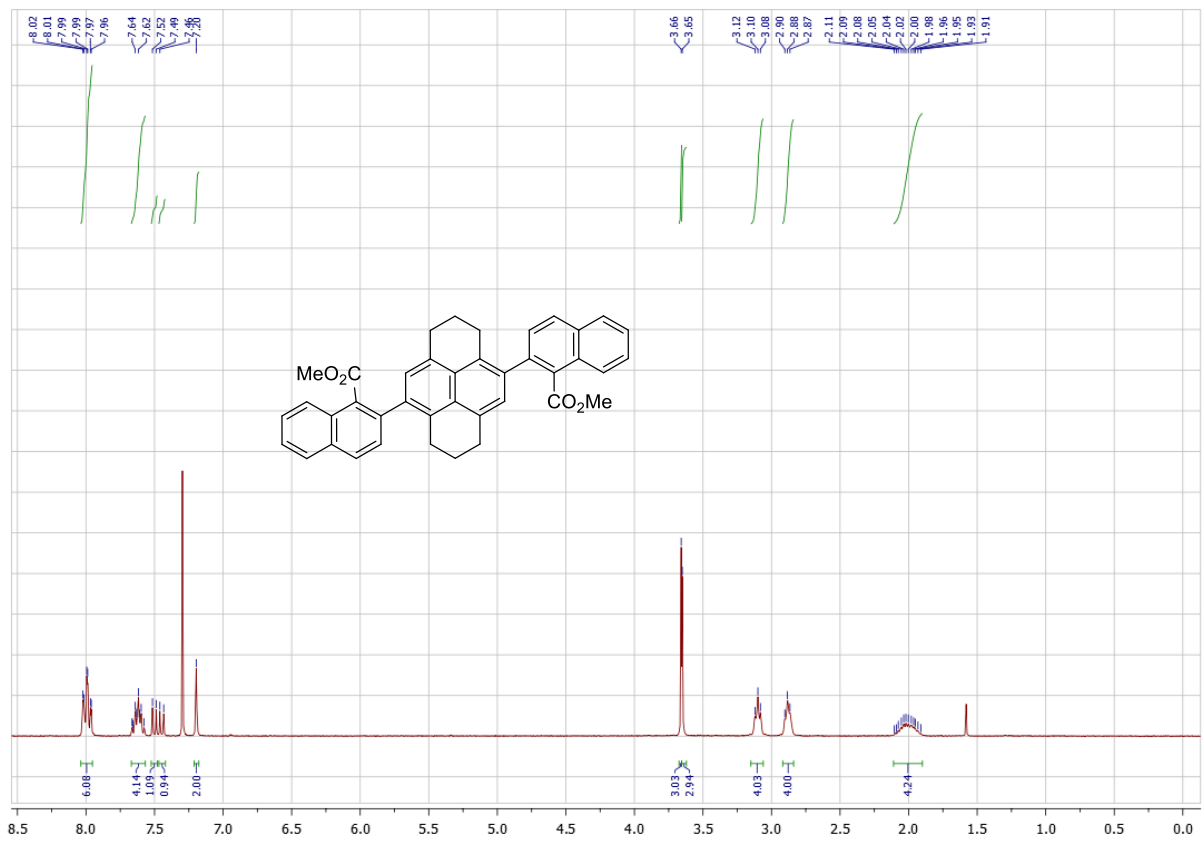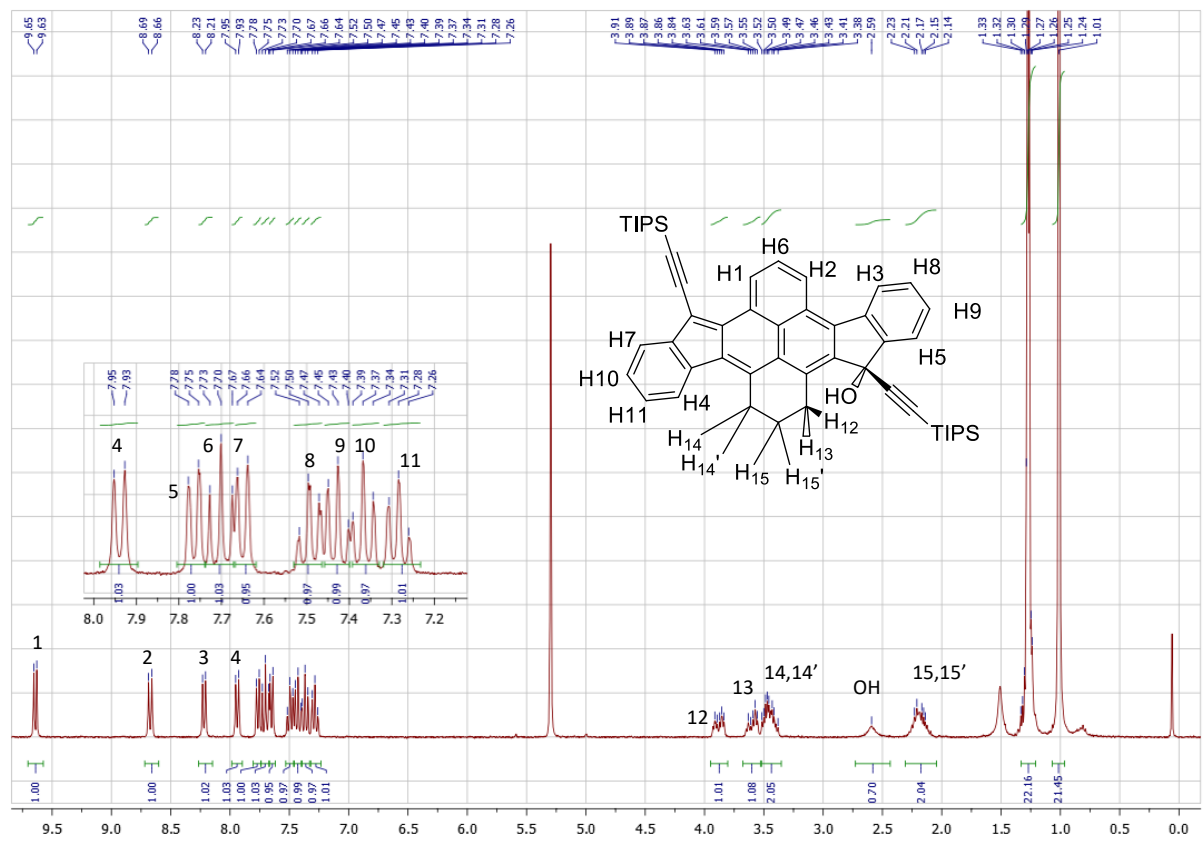

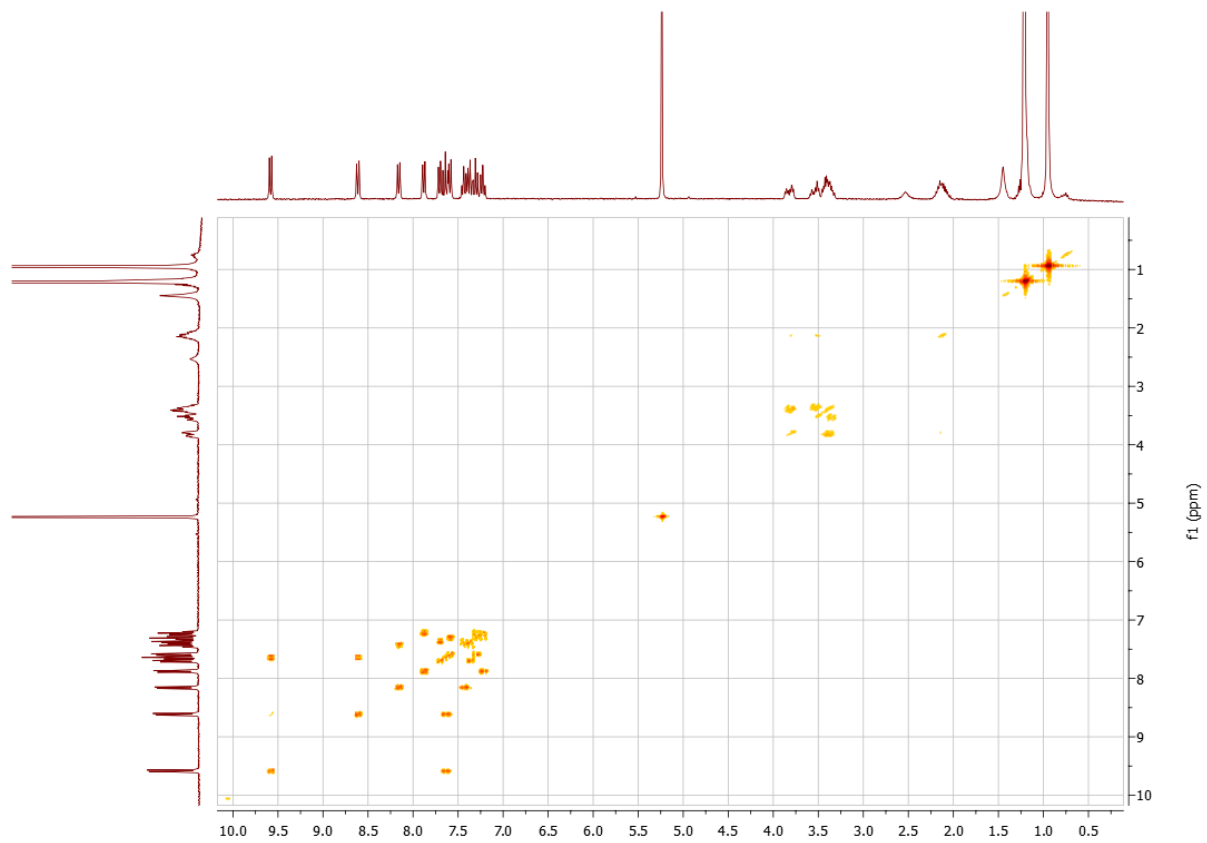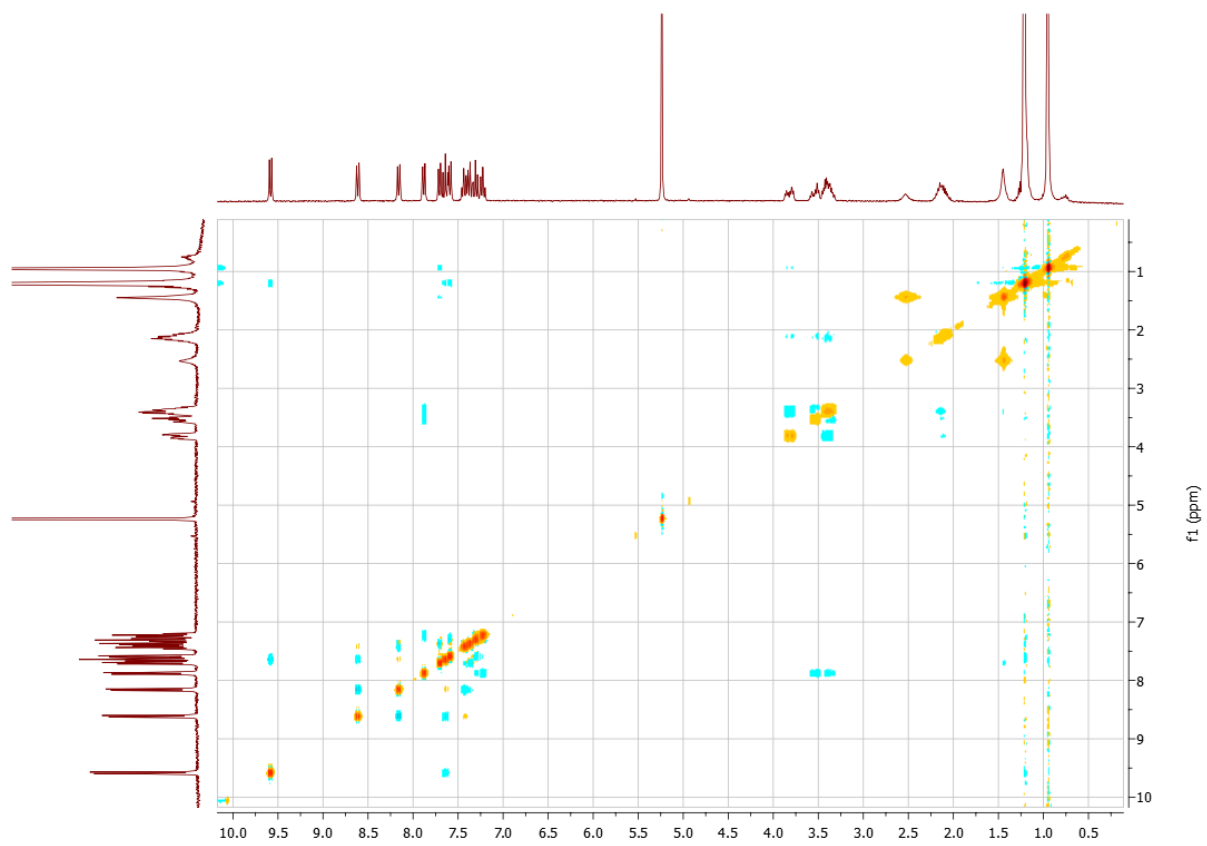

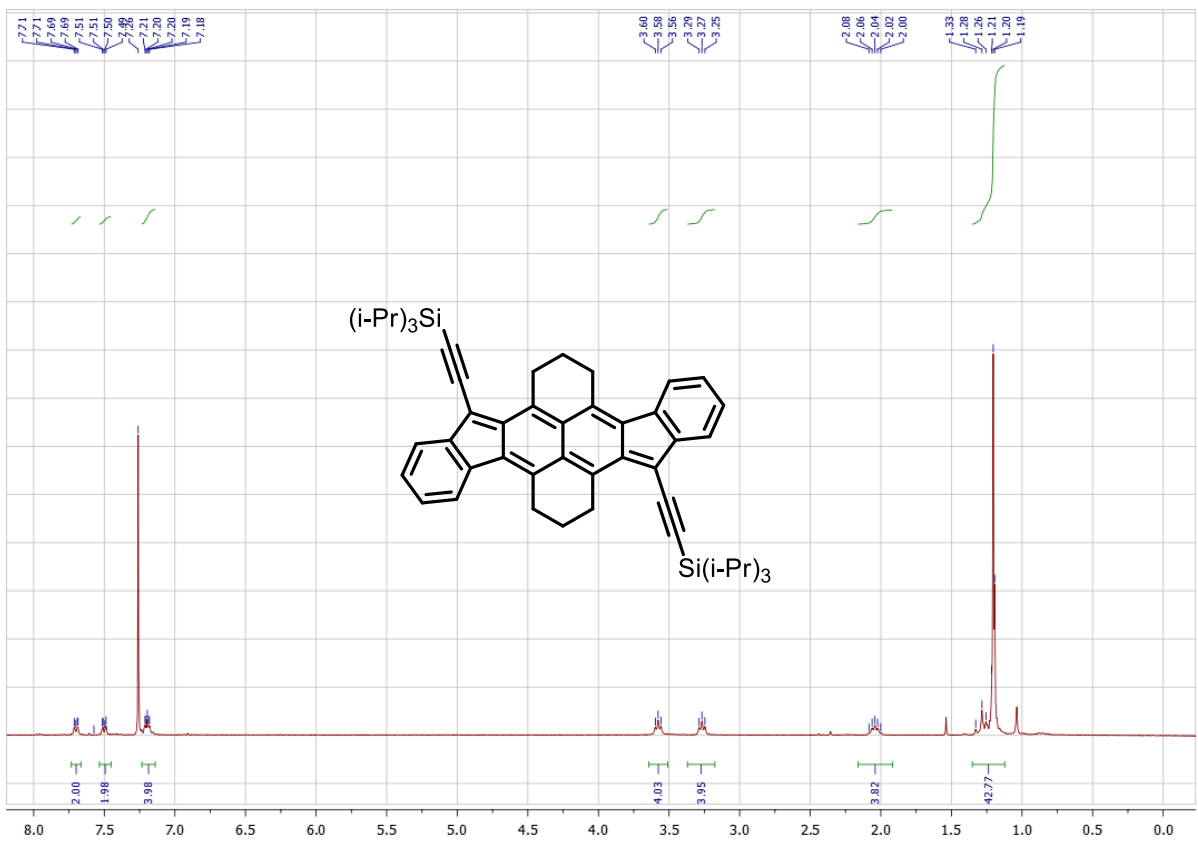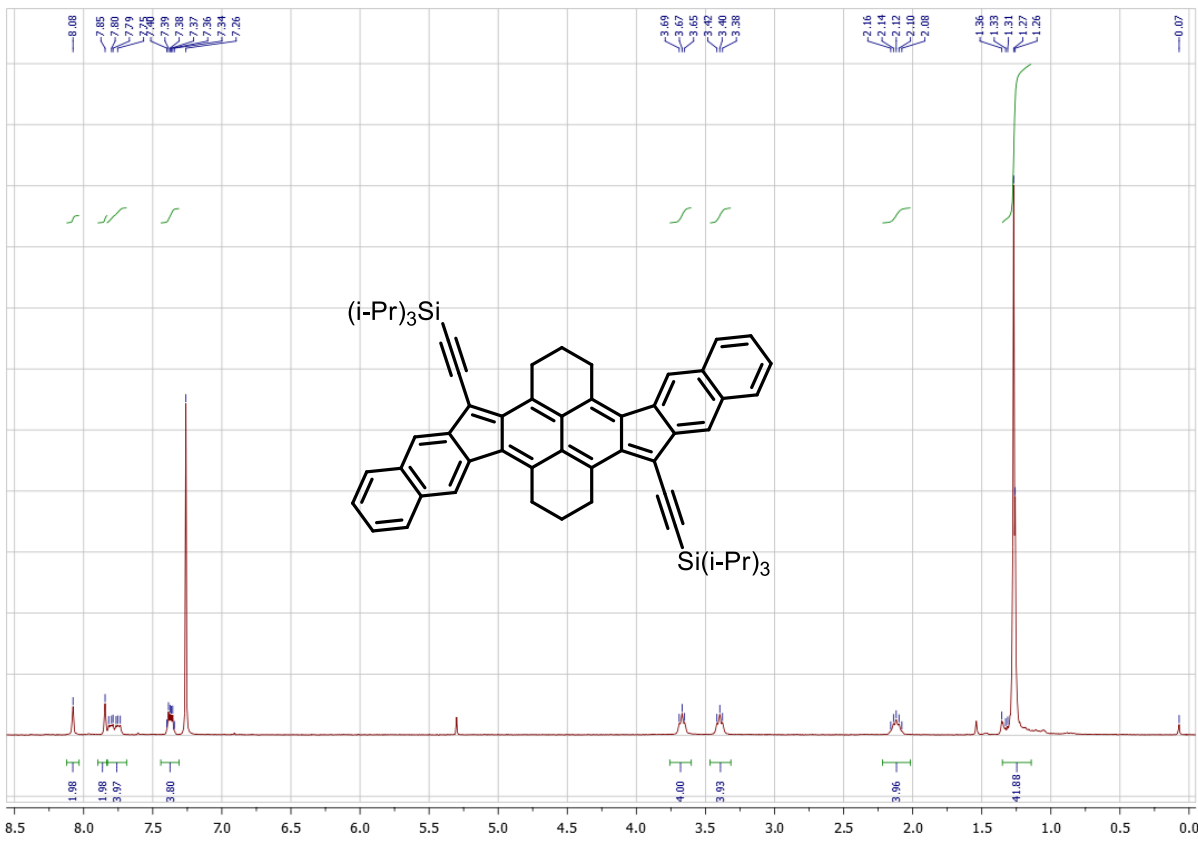

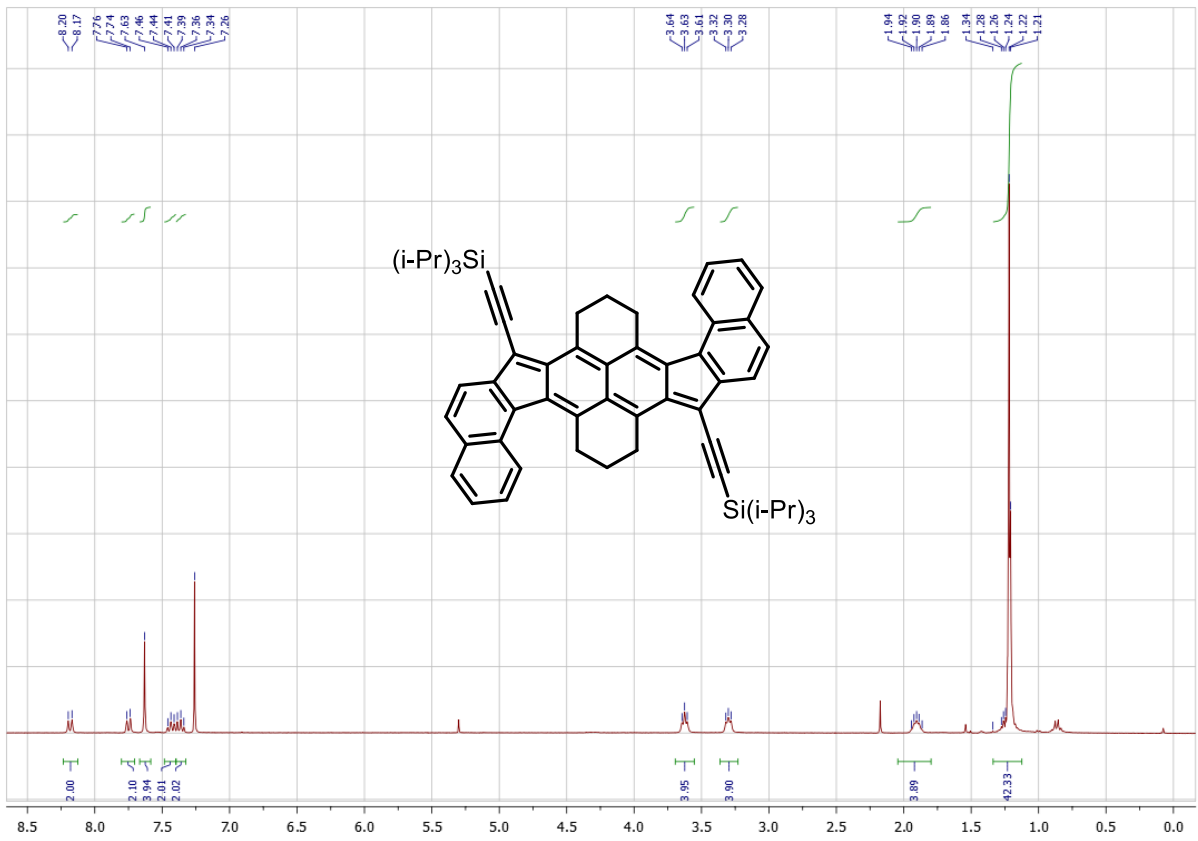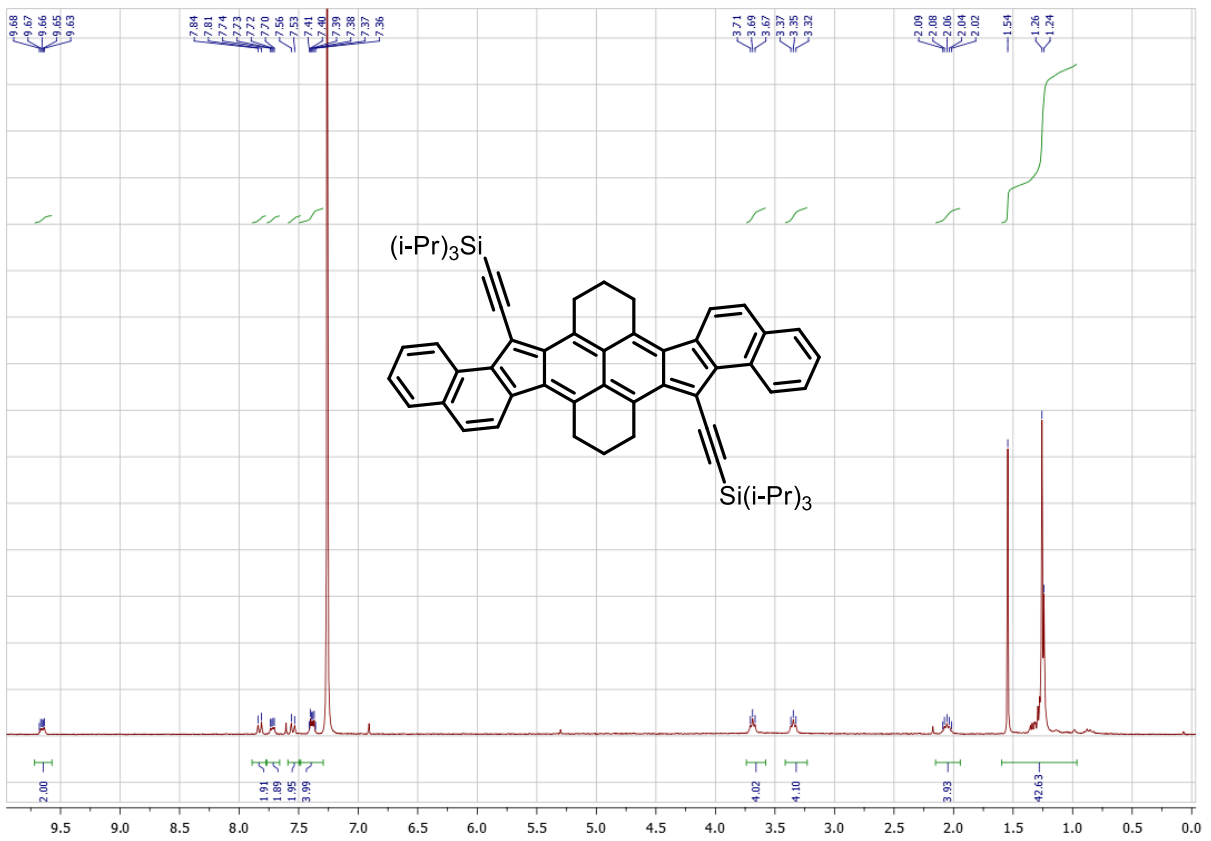

# INFRARED SPECTRA

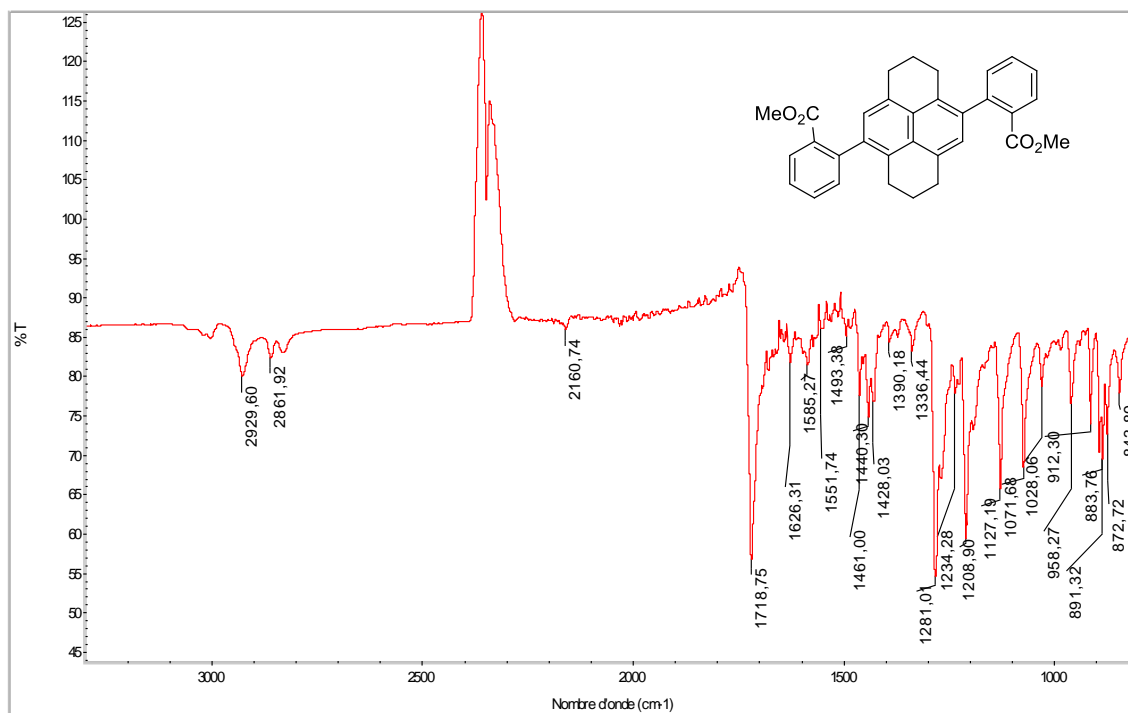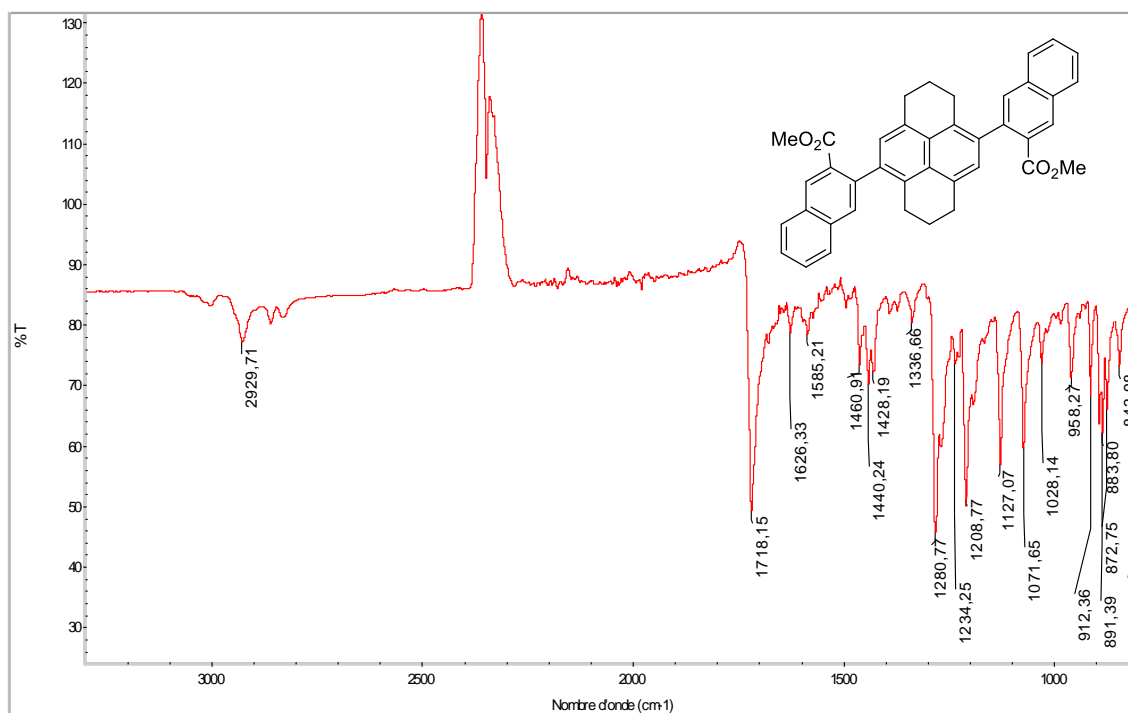

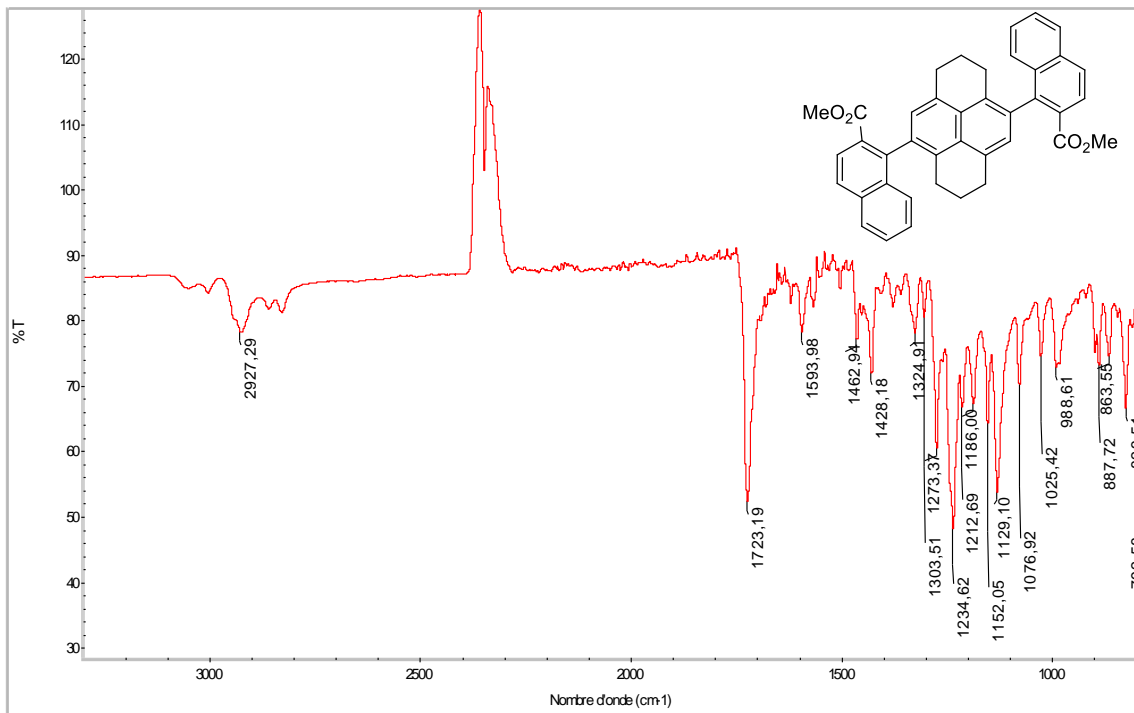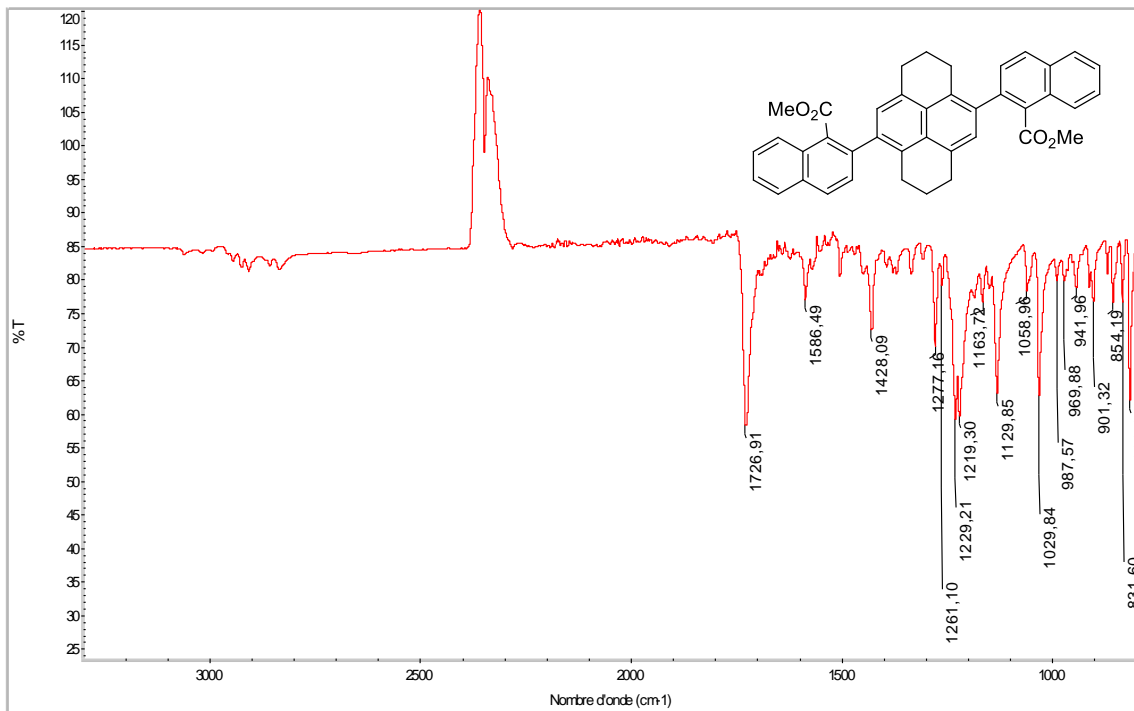



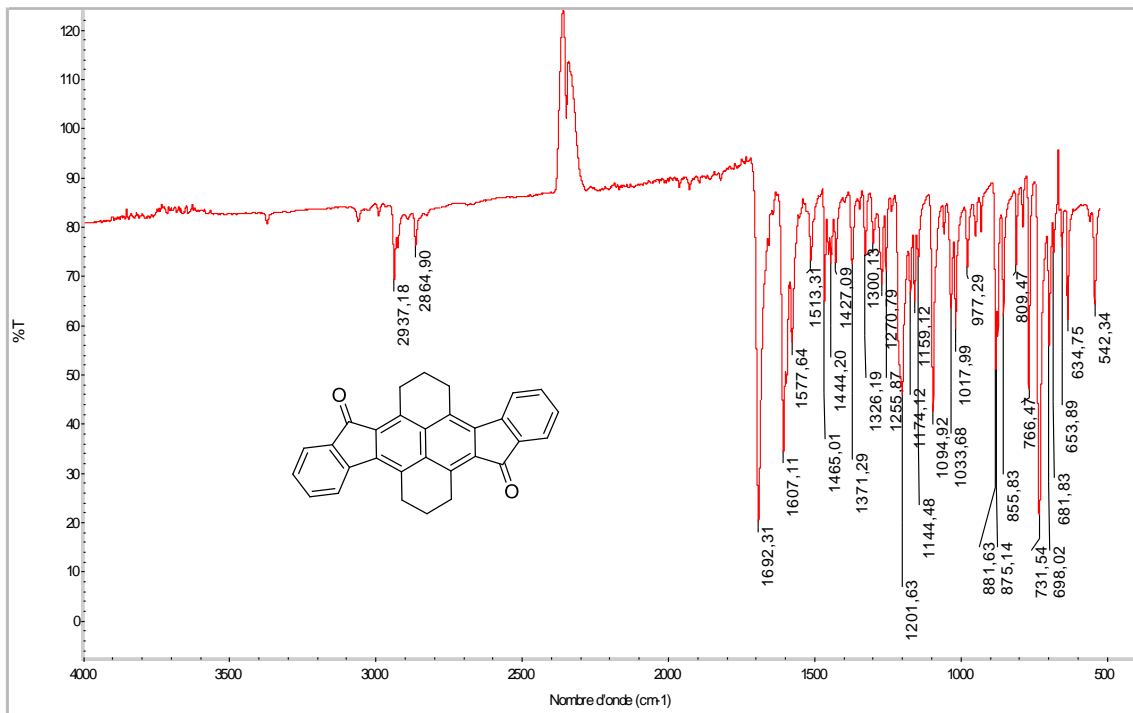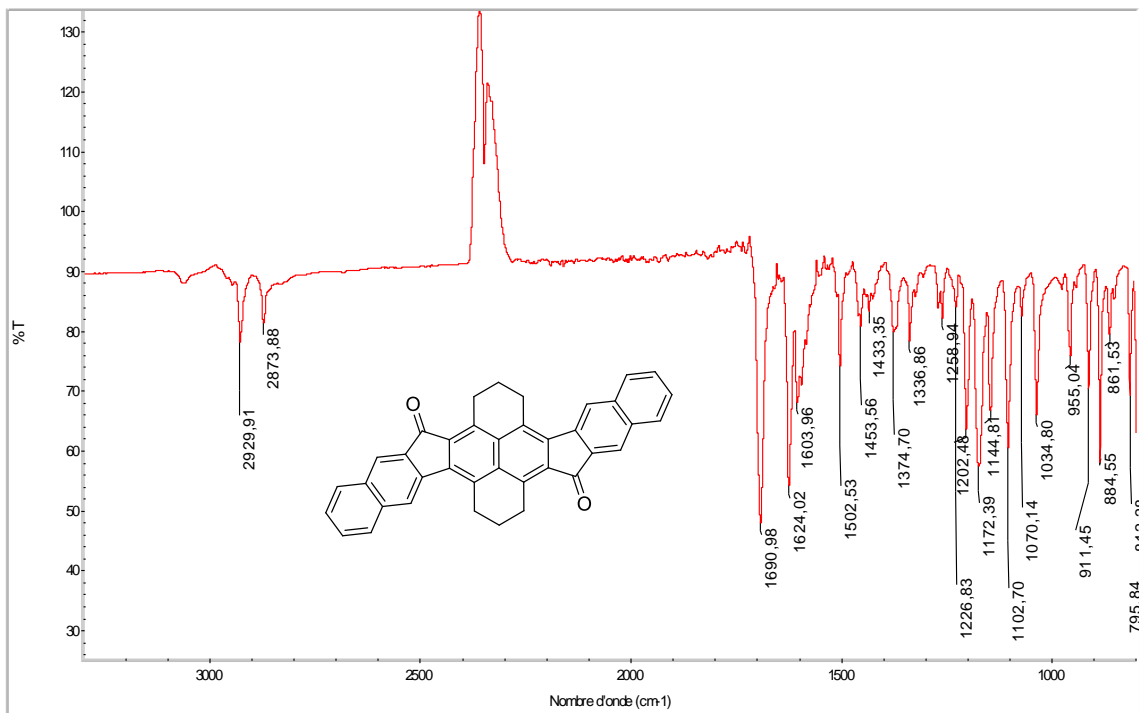

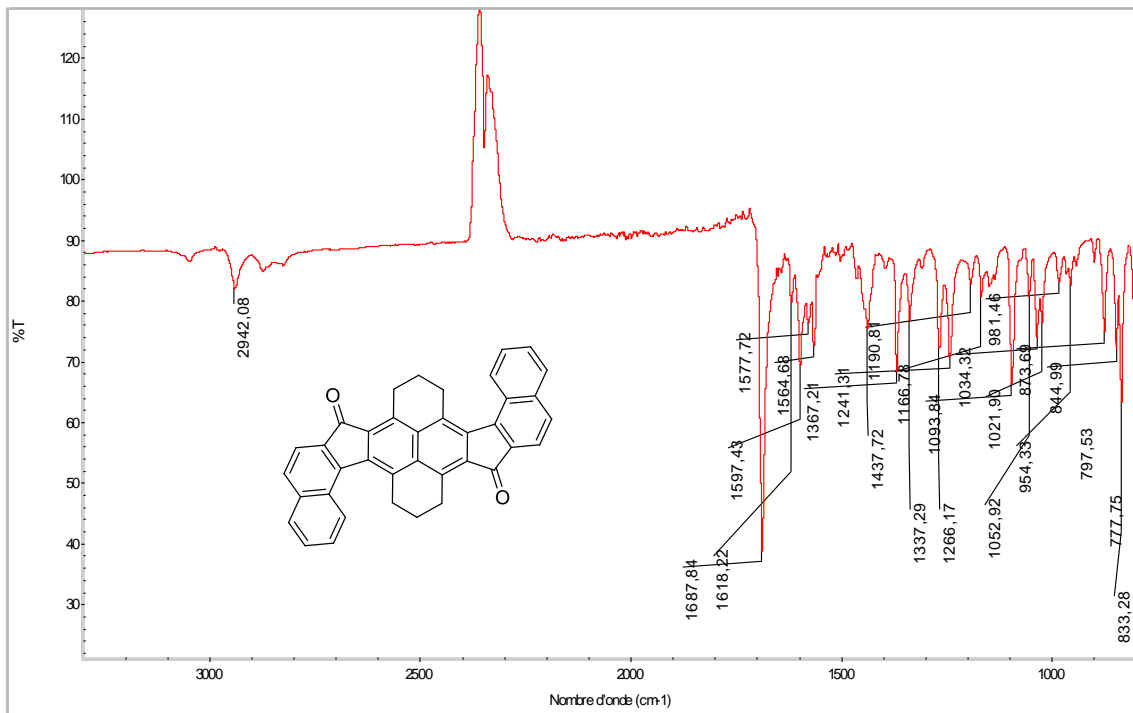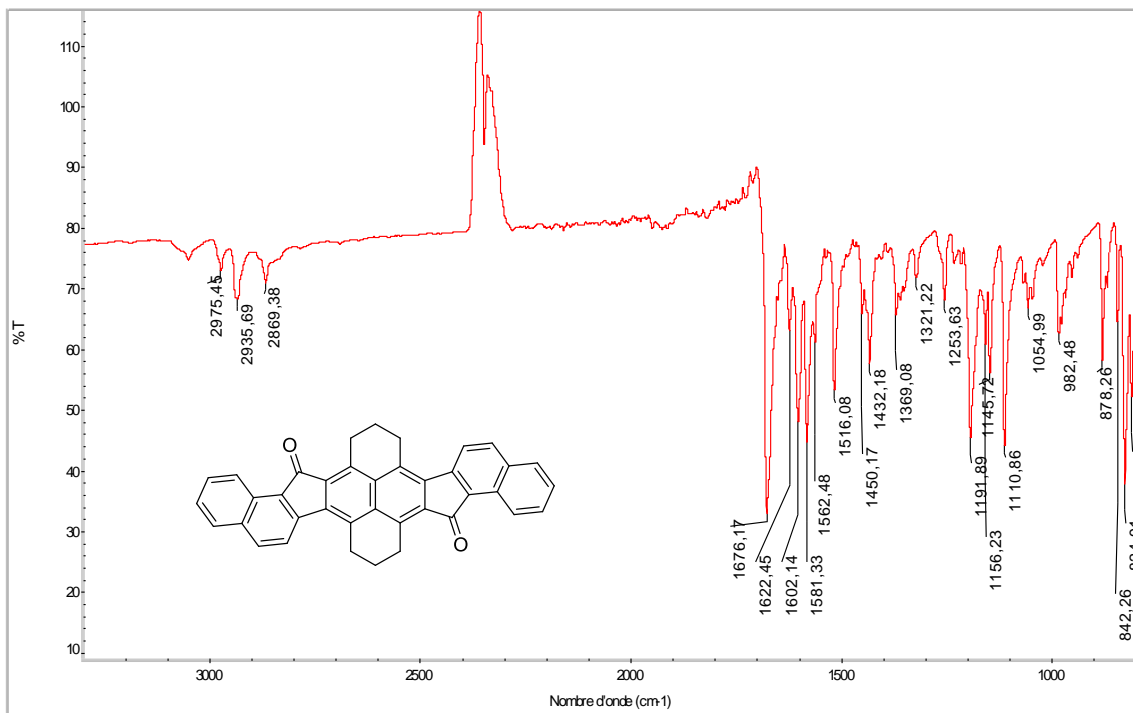

## MALDI (TOF) of HDIP derivatives

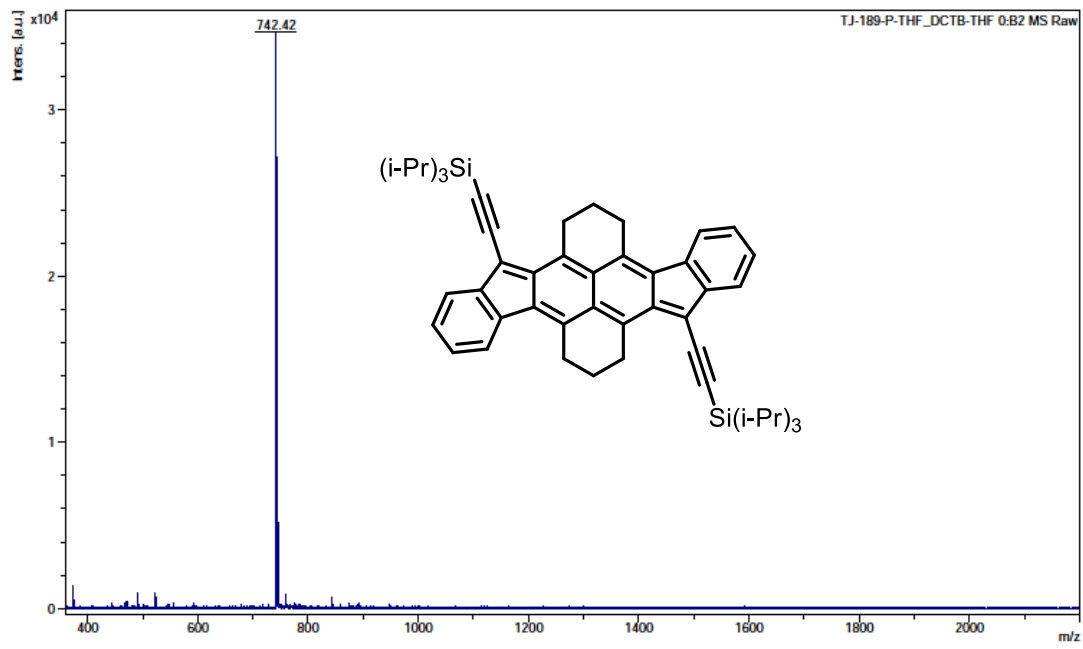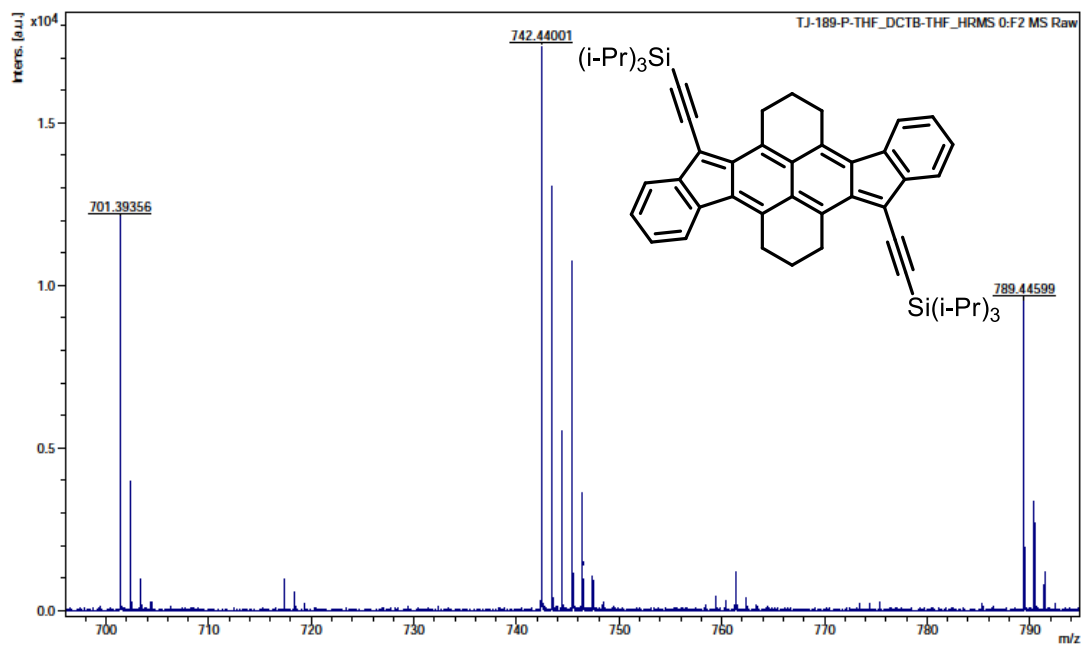

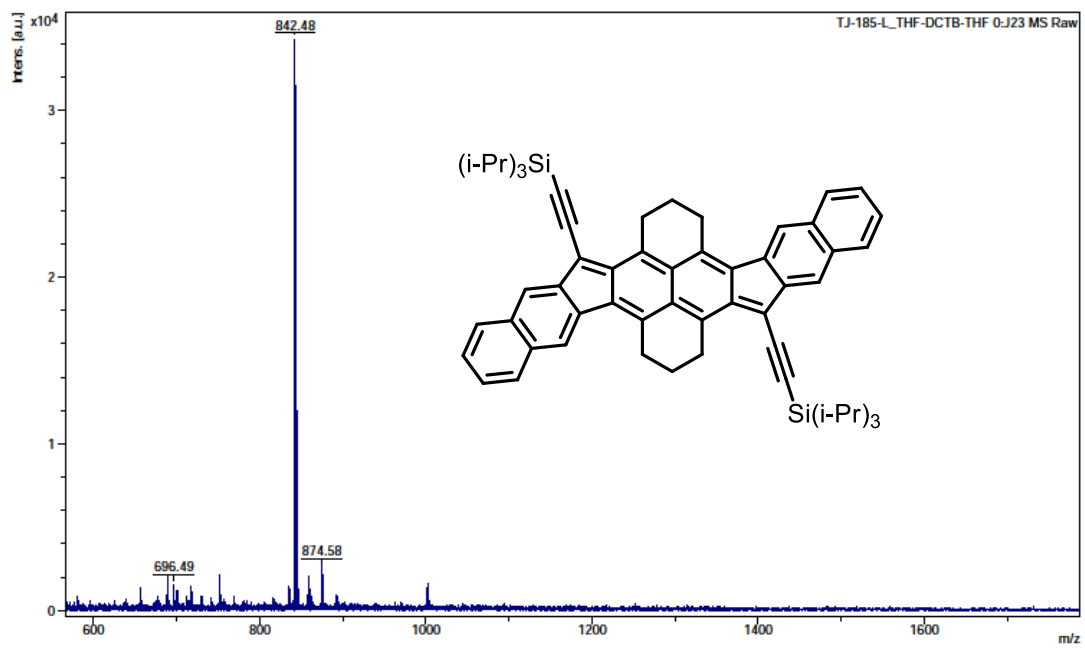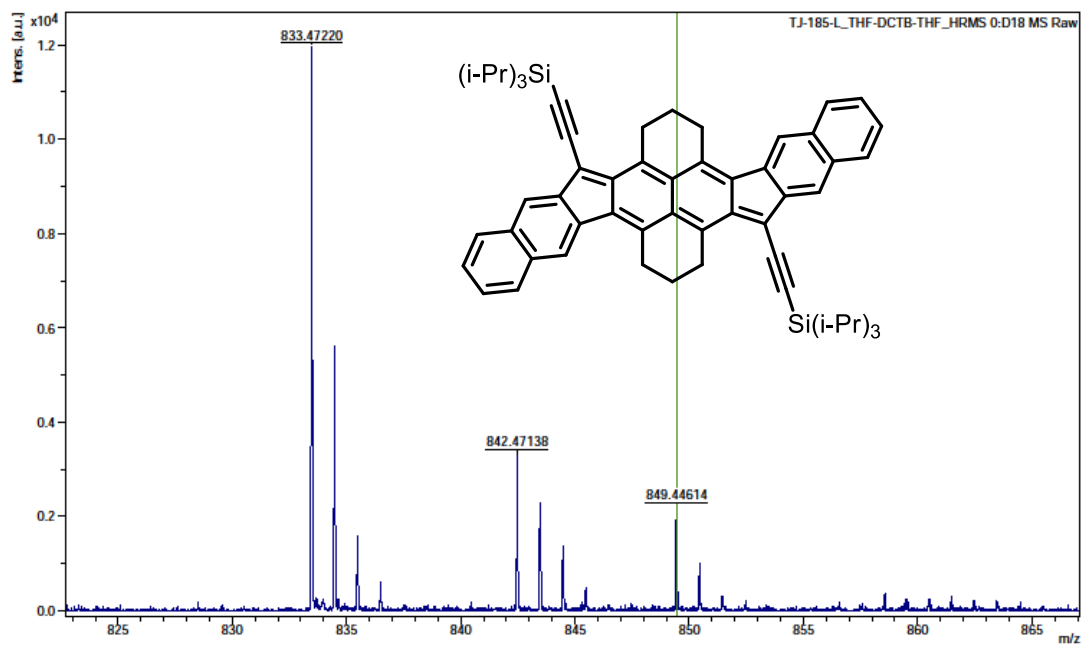

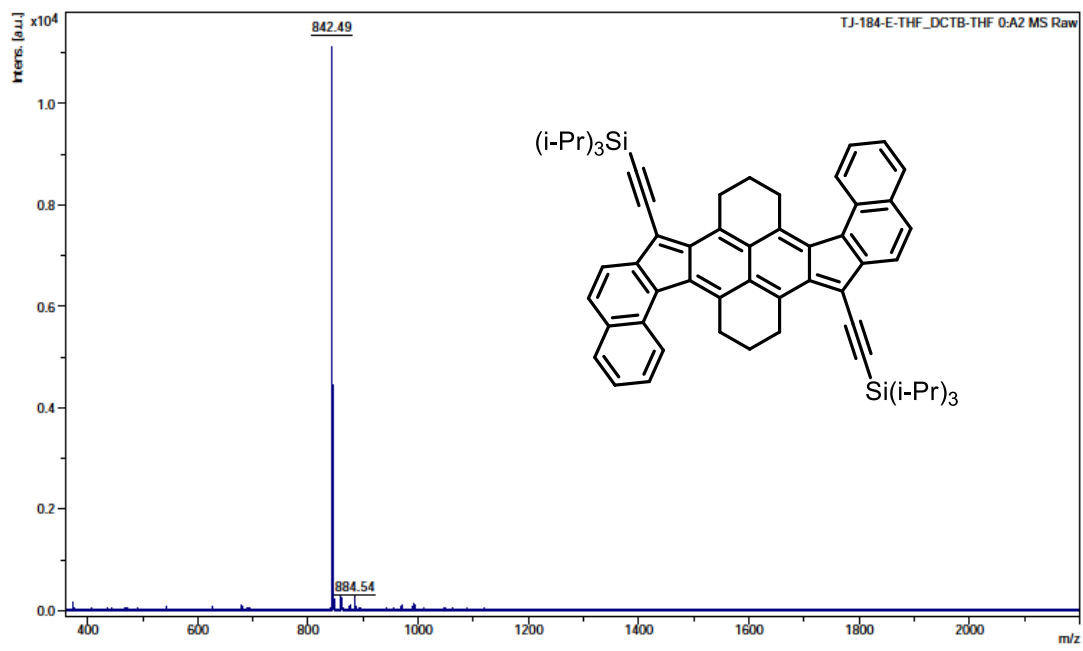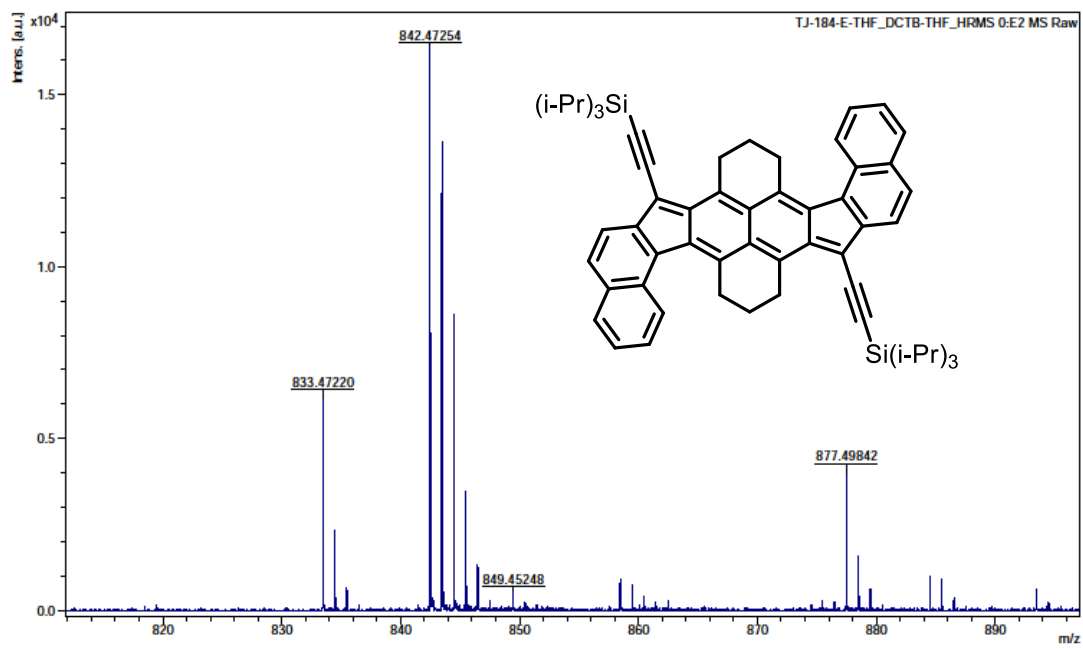

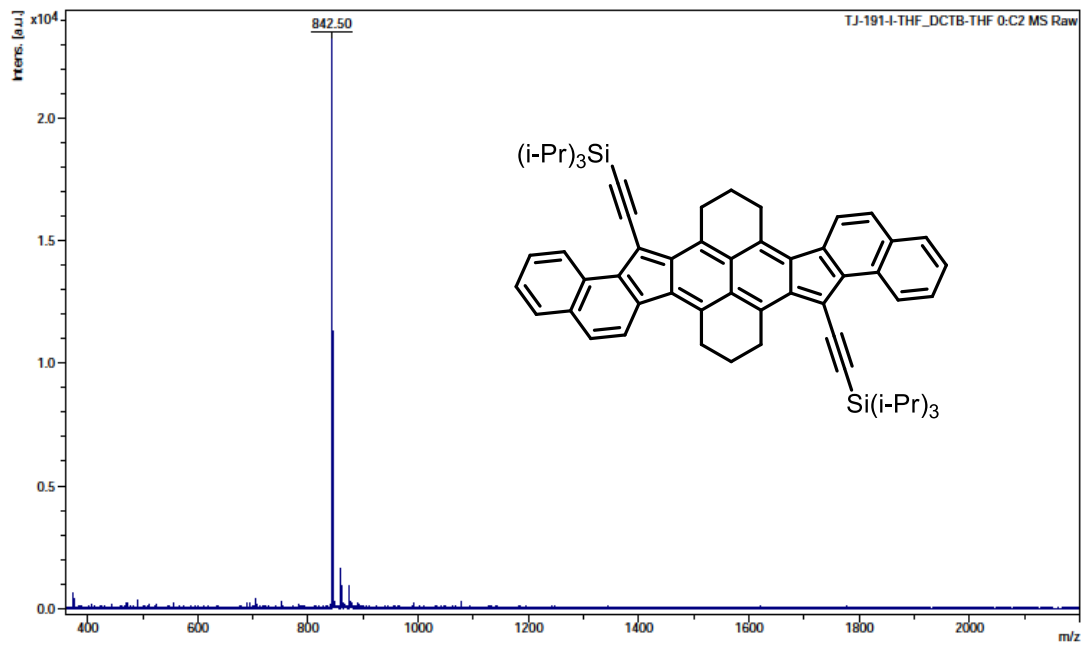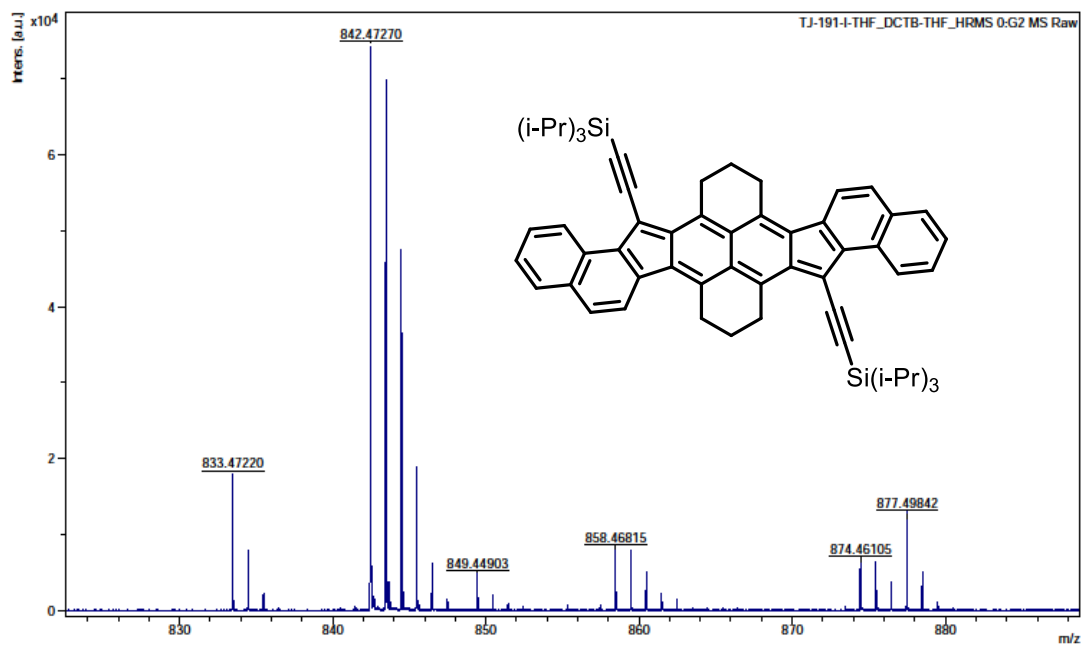

## REFERENCES

---

- <sup>i</sup> J. Lee and J. Park, *Org. Lett.*, 2015, **17**, 3960–3963.
- <sup>ii</sup> L. Ling, Y. He, X. Zhang, M. Luo and X. Zeng, *Angew. Chem. Int. Ed.*, 2019, **58**, 6554–6558.
- <sup>iii</sup> Y. Xia, Z. Liu, Q. Xiao, P. Qu, R. Ge, Y. Zhang and J. Wang, *Angew. Chem. Int. Ed.*, 2012, **51**, 5714–5717.
- <sup>iv</sup> F. Krätzschar, M. Kaßel, D. Delony and A. Breder, *Chem. Eur. J.*, 2015, **21**, 7030–7034.
- <sup>v</sup> B. Ghaffari, S. M. Preshlock, D. L. Plattner, R. J. Staples, P. E. Maligres, S. W. Krska, R. E. Maleczka and M. R. Smith, *J. Am. Chem. Soc.*, 2014, **136**, 14345–14348.
- <sup>vi</sup> G. P. Eyer, K. R. Kittilstved and T. L. Andrew, *J. Phys. Chem. C* 2017, **121**, 24929–24935.
- <sup>vii</sup> Gaussian 16, Revision A.03, M. J. Frisch, G. W. Trucks, H. B. Schlegel, G. E. Scuseria, M. A. Robb, J. R. Cheeseman, G. Scalmani, V. Barone, G. A. Petersson, H. Nakatsuji, X. Li, M. Caricato, A. V. Marenich, J. Bloino, B. G. Janesko, R. Gomperts, B. Mennucci, H. P. Hratchian, J. V. Ortiz, A. F. Izmaylov, J. L. Sonnenberg, D. Williams-Young, F. Ding, F. Lipparini, F. Egidi, J. Goings, B. Peng, A. Petrone, T. Henderson, D. Ranasinghe, V. G. Zakrzewski, J. Gao, N. Rega, G. Zheng, W. Liang, M. Hada, M. Ehara, K. Toyota, R. Fukuda, J. Hasegawa, M. Ishida, T. Nakajima, Y. Honda, O. Kitao, H. Nakai, T. Vreven, K. Throssell, J. A. Montgomery, Jr., J. E. Peralta, F. Ogliaro, M. J. Bearpark, J. J. Heyd, E. N. Brothers, K. N. Kudin, V. N. Staroverov, T. A. Keith, R. Kobayashi, J. Normand, K. Raghavachari, A. P. Rendell, J. C. Burant, S. S. Iyengar, J. Tomasi, M. Cossi, J. M. Millam, M. Klene, C. Adamo, R. Cammi, J. W. Ochterski, R. L. Martin, K. Morokuma, O. Farkas, J. B. Foresman, and D. J. Fox, Gaussian, Inc., Wallingford CT, 2016.
- <sup>viii</sup> G. E. Rudebusch, J. L. Zafra, K. Jorner, K. Fukuda, J. L. Marshall, I. Arrechea-Marcos, G. L. Espejo, R. P. Ortiz, C. J. Gómez-García, L. N. Zakharov, M. Nakano, H. Ottosson, J. Casado and M. M. Haley, *Nat. Chem.*, 2016, **8**, 753–759.
- <sup>ix</sup> D. D. Dohnert and J. Koutecký, *J. Am. Chem. Soc.*, 1980, **102**, 1789–1796.
- <sup>x</sup> K. Yamaguchi, *Chem. Phys. Lett.*, 1975, **33**, 330–335.
- <sup>xi</sup> T. Lu and F. Chen, Multiwfn: A multifunctional wavefunction analyzer. *J. Comput. Chem.*, 2012, **33**, 580–592.
- <sup>xii</sup> A. Rahalkar, A. Stanger, Aroma: <http://chemistry.technion.ac.il/members/amnon-stanger/>; (b) A. Stanger, *J. Org. Chem.*, 2006, **71**, 883–893; (c) A. Stanger, *J. Org. Chem.*, 2010, **75**, 2281–2288; (d) R. Gershoni-Poranne and A. Stanger, *Chem. Eur. J.*, 2014, **20**, 5673–5688.
